# Supplementary material for: Synthesis of lipo-chitooligosaccharide analogues and their interaction with LYR3, a high affinity binding protein for Nod factors and Myc-LCOs
Source: Royal Society of Chemistry journal article supplement (doi:10.1039/c7ob01201b), 2017-01-01

## Supporting Information

### **Synthesis of lipo-chitooligosaccharide analogues and evaluation of their ability to interact with the LysM receptor-like kinase LYR3, a high affinity binding protein for Nod factors and Myc-LCOs**

**Nathan Berthelot,<sup>a</sup> Antoine Brossay,<sup>a,b</sup> Virginie Gascioli,<sup>c</sup> Jean-Jacques Bono,<sup>c</sup> Aurélie Baron,<sup>a</sup> Jean-Marie Beau,<sup>a,b</sup> Dominique Urban,<sup>b</sup> François-Didier Boyer,<sup>a,d\*</sup> Boris Vauzeilles<sup>a,b\*</sup>**

[a] Institut de Chimie des Substances Naturelles, CNRS UPR2301, Univ. Paris-Sud, Université Paris-Saclay, 1 av. de la Terrasse, F-91198 Gif-sur-Yvette, France

[b] Laboratoire de Synthèse de Biomolécules, Institut de Chimie Moléculaire et des Matériaux d'Orsay, Univ. Paris-Sud, CNRS, Université Paris-Saclay, F-91405 Orsay, France

[c] LIPM, Université de Toulouse, INRA, CNRS, Castanet-Tolosan, France

[d] Institut Jean-Pierre Bourgin, INRA, AgroParisTech, CNRS, Université Paris-Saclay, RD10, F-78026 Versailles, France

Experimental procedures for the preparation of compounds **10-14, 16**

and intermediates **S1-S4**

S2-S9

NMR spectra (<sup>1</sup>H, <sup>13</sup>C) of compounds **3-8, 15-20, 3S, 4S** and intermediates **S1-S3**

S10-S77

## Products preparations and descriptions:

### Benzyl 2-acetamido-3,4,6-tri-O-acetyl-2-deoxy-β-D-glucopyranoside<sup>1</sup> (**10**).

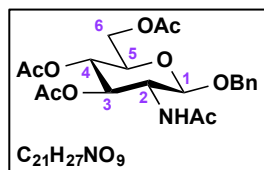

To a mixture of **9**<sup>2†</sup> (1.00 g, 2.57 mmol, 1.00 equiv.) and benzyl alcohol (347 μL, 3.35 mmol, 1.30 equiv.) in anhydrous CH<sub>2</sub>Cl<sub>2</sub> (19 mL) was added Fe(OTf)<sub>3</sub> (194 mg, 0.39 mmol, 0.15 equiv.) under an argon atmosphere. The reaction mixture was stirred at room temperature for 24 hours. The mixture was diluted in CH<sub>2</sub>Cl<sub>2</sub> (30 mL), and washed with a saturated NaHCO<sub>3</sub> solution (100 mL). The aqueous layer was extracted with CH<sub>2</sub>Cl<sub>2</sub> (5 x 30 mL). The organic layers were washed with H<sub>2</sub>O (200 mL), dried over Na<sub>2</sub>SO<sub>4</sub>, filtered and concentrated. The residue was purified by silica gel column chromatography (cyclohexane/EtOAc 25:75) to give product **10** (1.01 g, 93%) as a white amorphous solid. **Rf**: 0.53 (EtOAc). <sup>1</sup>H NMR (500 MHz, CDCl<sub>3</sub>) δ: 7.35-7.15 (m, 5H, CH arom.); 5.35 (d, 1H, *J*<sub>NH,2</sub> 8.7 Hz, NH); 5.18 (dd, 1H, *J*<sub>2,3</sub> 10.5, *J*<sub>3,4</sub> 9.7 Hz, **H-3**); 5.07 (dd, 1H, *J*<sub>4,5</sub> 9.6, *J*<sub>3,4</sub> 9.7 Hz, **H-4**); 4.87 (d, 1H, <sup>2</sup>*J*<sub>HCH</sub> 12.2 Hz, CHHPH); 4.61 (d, 1H, *J*<sub>1,2</sub> 8.5 Hz, **H-1**); 4.58 (d, 1H, <sup>2</sup>*J*<sub>HCH</sub> 12.2 Hz, CHHPH); 4.25 (dd, 1H, <sup>2</sup>*J*<sub>6a,6b</sub> 12.2, *J*<sub>5,6a</sub> 4.6 Hz, **H-6a**); 4.15 (dd, 1H, <sup>2</sup>*J*<sub>6a,6b</sub> 12.2, *J*<sub>5,6b</sub> 245 Hz, **H-6b**); 3.95 (ddd, 1H, *J*<sub>2,3</sub> 10.5, *J*<sub>2,NH</sub> 8.7, *J*<sub>2,1</sub> 8.5 Hz, **H-2**); 3.65 (ddd, 1H, *J*<sub>4,5</sub> 9.6, *J*<sub>5,6a</sub> 4.6, *J*<sub>5,6b</sub> 2.4 Hz, **H-5**); 2.08, 1.99, 1.88 (4 s, 12H, 4 Ac). <sup>13</sup>C NMR (125 MHz, CDCl<sub>3</sub>) δ: 171.2, 171.0, 170.3, 169.6 (4 COCH<sub>3</sub>); 137.1, 128.7, 128.3 (C arom.); 99.6 (C-1); 72.6 (C-3); 72.1 (C-5); 70.9 (CH<sub>2</sub>Ph); 68.8 (C-4); 62.3 (C-6); 54.8 (C-2); 23.5 (NCOCH<sub>3</sub>); 21.0, 20.9, 20.8 (OCOCH<sub>3</sub>). Analyses are in accordance with the literature.<sup>1</sup>

### Benzyl 2-acetamido-2-deoxy-β-D-glucopyranoside<sup>3</sup> (**11**).

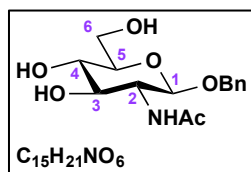

To a mixture of **10** (500 mg, 1.18 mmol, 1.0 equiv.) in dry CH<sub>3</sub>OH (7.3 mL) was added NaOCH<sub>3</sub> (590 μL, 0.2 mol/L in CH<sub>3</sub>OH, 0.12 mmol, 0.1 equiv.) under an argon atmosphere. The reaction mixture was stirred at room temperature for 30 min. A white precipitate formed rapidly within 10 min. The mixture was diluted in CH<sub>2</sub>Cl<sub>2</sub>/CH<sub>3</sub>OH until dissolution of the precipitate, neutralized with Dowex<sup>®</sup> 50WX8 H<sup>+</sup> resin, filtrated and concentrated to give product **11** (339 mg, 92%) as a white amorphous solid. **Rf**: 0.08 (CH<sub>2</sub>Cl<sub>2</sub>/CH<sub>3</sub>OH 9:1). <sup>1</sup>H NMR (500 MHz, CD<sub>3</sub>OD) δ: 7.36-7.23 (m, 5H, CH arom.); 4.88 (d, 1H, <sup>2</sup>*J*<sub>HCH</sub> 12.3 Hz, CHHPH); 4.61 (d, 1H, <sup>2</sup>*J*<sub>HCH</sub> 12.3 Hz, CHHPH); 5.33 (d, 1H, *J*<sub>1,2</sub> 8.4 Hz, **H-1**); 3.91 (dd, 1H, <sup>2</sup>*J*<sub>6a,6b</sub> 12.0, *J*<sub>5,6a</sub> 1.9 Hz, **H-6a**); 3.72 (dd, 1H, *J*<sub>2,3</sub> 10.0, *J*<sub>2,1</sub> 8.4 Hz, **H-2**); 3.71 (dd, 1H, <sup>2</sup>*J*<sub>6a,6b</sub> 12.0, *J*<sub>5,6b</sub> 5.7 Hz, **H-6b**); 3.45 (dd, 1H, *J*<sub>2,3</sub> 10.0, *J*<sub>3,4</sub> 8.9 Hz, **H-3**); 3.34 (dd, 1H, *J*<sub>4,5</sub> 9.7, *J*<sub>3,4</sub> 8.9 Hz, **H-4**); 3.27 (ddd, 1H, *J*<sub>4,5</sub> 9.7, *J*<sub>5,6b</sub> 5.7, *J*<sub>5,6a</sub> 1.9 Hz, **H-5**); 1.95 (s, 3H, Ac). <sup>13</sup>C NMR (125 MHz, CD<sub>3</sub>OD) δ:

<sup>†</sup> Commercially available.



173.9 (COCH<sub>3</sub>); 139.4, 129.5, 129.0, 128.8 (C arom.); 102.0 (C-1); 78.2 (C-5); 76.1 (C-3); 72.4 (C-4); 71.7 (CH<sub>2</sub>Ph); 63.0 (C-6); 57.5 (C-2); 23.1 (COCH<sub>3</sub>). Analyses are in accordance with the literature.<sup>3</sup>

#### Benzyl 2-acetamido-2-deoxy-4,6-O-isopropylidene-β-D-glucopyranoside<sup>4</sup> (**12**).

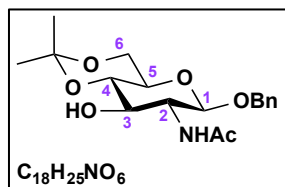

To a solution of **11** (1.61 g, 5.16 mmol, 1.0 equiv.) and 2,2-dimethoxypropane (9.5 mL, 77.4 mmol, 25.0 equiv.) in dry DMF (20.6 mL) was added PTSA (98 mg, 0.52 mmol, 0.1 equiv.) under an argon atmosphere. The reaction mixture was stirred at 40 °C and 250 mbar for 1 hour, and the acid was then quenched with triethylamine and the mixture concentrated to give crude isopropylidene product **12** as a yellowish solid used in the next step without further purification. An analytical sample of pure product **12**, as a white amorphous solid, was obtained by silica gel column chromatography of an aliquot (CH<sub>2</sub>Cl<sub>2</sub>/CH<sub>3</sub>OH 100:0 to 90:10) and characterized. **Rf**: 0.30 (CH<sub>2</sub>Cl<sub>2</sub>/CH<sub>3</sub>OH 95:5).  $[\alpha]_D^{20} = -103.40$  ( $c = 1.00$ , CHCl<sub>3</sub>) ( $-110.2$  ( $c = 1$ , CHCl<sub>3</sub>) in literature<sup>4</sup>). **<sup>1</sup>H NMR (500 MHz, CDCl<sub>3</sub>)**  $\delta$ : 7.40-7.22 (m, 5H, CH arom.); 5.65 (d, 1H,  $J_{\text{NH},2}$  5.3 Hz, NH); 4.86 (d, 1H,  $^2J_{\text{HCH}}$  12.0 Hz, CHHPh); 4.59 (d, 1H,  $J_{1,2}$  8.3 Hz, H-1); 4.55 (d, 1H,  $^2J_{\text{HCH}}$  12.0 Hz, CHHPh); 4.27 (s, 1H, OH); 3.93 (dd, 1H,  $^2J_{6a,6b}$  10.8,  $J_{5,6a}$  5.3 Hz, H-6a); 3.83 (dd, 1H,  $J_{2,3}$  9.6,  $J_{3,4}$  9.0 Hz, H-3); 3.80 (dd, 1H,  $^2J_{6a,6b}$  10.8,  $J_{5,6b}$  10.5 Hz, H-6b); 3.58 (dd, 1H,  $J_{4,5}$  9.8,  $J_{3,4}$  9.0 Hz, H-4); 3.51 (ddd, 1H,  $J_{2,3}$  9.6,  $J_{1,2}$  8.3,  $J_{\text{NH},2}$  5.3 Hz, H-2); 3.27 (ddd, 1H,  $J_{5,6b}$  10.5,  $J_{4,5}$  9.8,  $J_{5,6a}$  5.3 Hz, H-5); 1.93 (s, 3H, Ac); 1.50 (s, 3H, CH<sub>3</sub>CCH<sub>3</sub>); 1.41 (s, 3H, CH<sub>3</sub>CCH<sub>3</sub>). **<sup>13</sup>C NMR (125 MHz, CDCl<sub>3</sub>)**  $\delta$ : 172.1 (COCH<sub>3</sub>); 137.1, 128.9, 128.5, 128.4 (C arom.); 100.1 (CH<sub>3</sub>CCH<sub>3</sub>); 99.8 (C-1); 74.5 (C-4); 72.3 (C-3); 71.2 (CH<sub>2</sub>Ph); 67.5 (C-5); 62.2 (C-6); 59.1 (C-2); 29.3 (CH<sub>3</sub>CCH<sub>3</sub>); 23.7 (COCH<sub>3</sub>); 19.3 (CH<sub>3</sub>CCH<sub>3</sub>). **HRMS (ESI<sup>+</sup>)**: calculated for C<sub>18</sub>H<sub>26</sub>NO<sub>6</sub><sup>+</sup> 352.1755 [M+H<sup>+</sup>]; found 352.1740. **IR**:  $\nu$  (cm<sup>-1</sup>) = 3600-3100, 2881, 1652, 1554, 1374, 1200, 1118, 1082, 1042, 857, 754. Analyses are in accordance with the literature.<sup>4</sup>

#### Benzyl 2-acetamido-3-O-benzyl-2-deoxy-4,6-O-isopropylidene-β-D-glucopyranoside<sup>5</sup> (**13**).

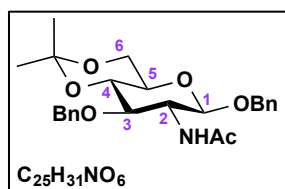

To a solution of crude **12** in dry DMF (25 mL) were added BaO (2.38 g, 15.52 mmol, 3.0 equiv.) and Ba(OH)<sub>2</sub>·8H<sub>2</sub>O (814 mg, 2.58 mmol, 0.5 equiv.) under an argon atmosphere. The mixture was stirred at room temperature for 1 hour. Benzyl bromide (925  $\mu$ L, 7.73 mmol, 1.5 equiv.) was then added and the mixture was stirred at room temperature for 19 hours. The mixture was diluted in CH<sub>2</sub>Cl<sub>2</sub>/CH<sub>3</sub>OH, filtered over Celite<sup>®</sup> plug and concentrated. The residue was purified by silica gel column chromatography (CH<sub>2</sub>Cl<sub>2</sub>/CH<sub>3</sub>OH 99:1) to give product **13** (1.99 g, 87% over 2 steps) as yellow crystalline solid. **Rf**: 0.18 (CH<sub>2</sub>Cl<sub>2</sub>/CH<sub>3</sub>OH 99:1).  $[\alpha]_D^{20} = -21$  ( $c = 1$ , CHCl<sub>3</sub>) ( $-21.00$  ( $c = 1.10$ , CHCl<sub>3</sub>) in literature<sup>5</sup>). **<sup>1</sup>H NMR (300 MHz, CDCl<sub>3</sub>)**  $\delta$ : 7.36-7.21 (m, 10H, CH arom.); 5.36 (d, 1H,  $J_{\text{NH},2}$  7.8 Hz, NH);

4.89 (d, 1H,  $J_{1,2}$  8.3 Hz, **H-1**); 4.83 (d, 1H,  $^2J_{\text{HCH}}$  11.9 Hz, **CHHPh-1**); 4.80 (d, 1H,  $^2J_{\text{HCH}}$  11.9 Hz, **CHHPh-3**); 4.57 (d, 1H,  $^2J_{\text{HCH}}$  11.9 Hz, **CHHPh-3**); 4.53 (d, 1H,  $^2J_{\text{HCH}}$  11.9 Hz, **CHHPh-1**); 3.98 (dd, 1H,  $J_{2,3}$  9.9,  $J_{3,4}$  9.0 Hz, **H-3**); 3.94 (dd, 1H,  $^2J_{6a,6b}$  10.8,  $J_{5,6a}$  5.5 Hz, **H-6a**); 3.79 (dd, 1H,  $^2J_{6a,6b}$  10.8,  $J_{5,6b}$  10.2 Hz, **H-6b**); 3.70 (dd, 1H,  $J_{4,5}$  9.5,  $J_{3,4}$  9.0 Hz, **H-4**); 3.35 (ddd, 1H,  $J_{2,3}$  9.9,  $J_{1,2}$  8.3,  $J_{\text{NH},2}$  7.8 Hz, **H-2**); 3.32 (ddd, 1H,  $J_{5,6b}$  10.2,  $J_{4,5}$  9.5,  $J_{5,6a}$  5.5 Hz, **H-5**); 1.81 (s, 3H, **Ac**); 1.48 (s, 3H, **CH<sub>3</sub>CCH<sub>3</sub>**); 1.41 (s, 3H, **CH<sub>3</sub>CCH<sub>3</sub>**).  $^{13}\text{C NMR}$  (125 MHz,  $\text{CDCl}_3$ )  $\delta$ : 170.4 (**COCH<sub>3</sub>**); 138.9, 137.5, 128.6, 128.5, 128.3, 128.2, 128.1, 127.9 (**C arom.**); 99.9 (**C-1**); 99.5 (**CH<sub>3</sub>CCH<sub>3</sub>**); 77.2 (**C-3**); 75.6 (**C-4**); 74.2 (**CH<sub>2</sub>Ph-3**); 71.4 (**CH<sub>2</sub>Ph-1**); 67.1 (**C-5**); 62.5 (**C-6**); 57.7 (**C-2**); 29.4 (**CH<sub>3</sub>CCH<sub>3</sub>**); 23.7 (**COCH<sub>3</sub>**); 19.3 (**CH<sub>3</sub>CCH<sub>3</sub>**). **HRMS (ESI<sup>+</sup>)**: calculated for  $\text{C}_{25}\text{H}_{32}\text{NO}_6^+$  442.2224 [ $\text{M}+\text{H}^+$ ]; found 442.2211. **IR**:  $\nu$  ( $\text{cm}^{-1}$ ) = 3277, 3100-2800, 1654, 1563, 1374, 1201, 1117, 1084, 859, 737, 697.

#### Benzyl 2-acetamido-3-O-benzyl-2-deoxy- $\beta$ -D-glucopyranoside (**14**).

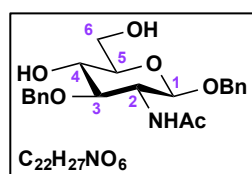

To a solution of **13** (1.7 g, 3.8 mmol, 1 equiv.) in  $\text{CH}_2\text{Cl}_2$  (5.8 mL) was added a solution of trifluoroacetic acid (50% in water, 5.8 mL, 37.9 mmol, 10 equiv.) at 0 °C. The mixture was stirred at room temperature for 2 hours. The reaction mixture was then diluted with  $\text{H}_2\text{O}$ , cooled at 0 °C and the acid was quenched with triethylamine (5.3 mL, 10 equiv.). A white precipitate was filtered off, yielding a first crop of product **14**. Sodium chloride was added to the filtrate and the layers separated. The aqueous layer was then extracted with  $\text{CH}_2\text{Cl}_2$  (3 x 50 mL). The combined organic layers were dried over  $\text{Na}_2\text{SO}_4$ , filtered and concentrated yielding a second crop. The two samples were combined and purified by silica gel column chromatography ( $\text{CH}_2\text{Cl}_2/\text{CH}_3\text{OH}$  96:4) to give product **14** (1.3 g, 88%) as a white amorphous solid. **Rf**: 0.30 ( $\text{CH}_2\text{Cl}_2/\text{CH}_3\text{OH}$  95:5).  $[\alpha]_{\text{D}}^{20} = -24.00$  ( $c = 1.00$ ,  $\text{CH}_3\text{OH}$ ) ( $-20$  ( $c = 0.5$ ,  $\text{EtOH}$ ) in literature<sup>6</sup>).  $^1\text{H NMR}$  (300 MHz,  $\text{CD}_3\text{OD}$ )  $\delta$ : 7.36-7.20 (m, 10H, **CH arom.**); 4.88 (d, 1H,  $^2J_{\text{HCH}}$  12.2 Hz, **CHHPh-1**); 4.87 (d, 1H,  $^2J_{\text{HCH}}$  11.3 Hz, **CHHPh-3**); 4.63 (d, 1H,  $^2J_{\text{HCH}}$  11.3 Hz, **CHHPh-3**); 4.61 (d, 1H,  $^2J_{\text{HCH}}$  12.2 Hz, **CHHPh-1**); 4.50 (d, 1H,  $J_{1,2}$  8.4 Hz, **H-1**); 3.93 (dd, 1H,  $^2J_{6a,6b}$  12.0,  $J_{5,6a}$  2.0 Hz, **H-6a**); 3.82 (dd, 1H,  $J_{2,3}$  10.1,  $J_{1,2}$  8.4 Hz, **H-2**); 3.72 (dd, 1H,  $^2J_{6a,6b}$  12.0,  $J_{5,6b}$  6.0 Hz, **H-6b**); 3.57-3.45 (m, 2H, **H-3** and **H-4**); 3.34-3.26 (m, 1H, **H-5**); 1.85 (s, 3H, **Ac**).  $^{13}\text{C NMR}$  (125 MHz,  $\text{CD}_3\text{OD}$ )  $\delta$ : 173.5 (**COCH<sub>3</sub>**); 140.4, 139.3, 129.5, 129.4, 129.0, 128.9, 128.8, 128.6 (**C arom.**); 101.8 (**C-1**); 84.3 (**C-3**); 78.2 (**C-5**); 78.8 (**CH<sub>2</sub>Ph-3**); 72.2 (**C-4**); 71.7 (**CH<sub>2</sub>Ph-1**); 62.9 (**C-6**); 56.5 (**C-2**); 23.2 (**COCH<sub>3</sub>**). **HRMS (ESI<sup>+</sup>)**: calculated for  $\text{C}_{22}\text{H}_{28}\text{NO}_6^+$  402.1911 [ $\text{M}+\text{H}^+$ ]; found 402.1899. **IR**:  $\nu$  ( $\text{cm}^{-1}$ ) = 3400-3100, 2867, 1654, 1551, 1373, 1111, 1074, 1053, 737, 699.

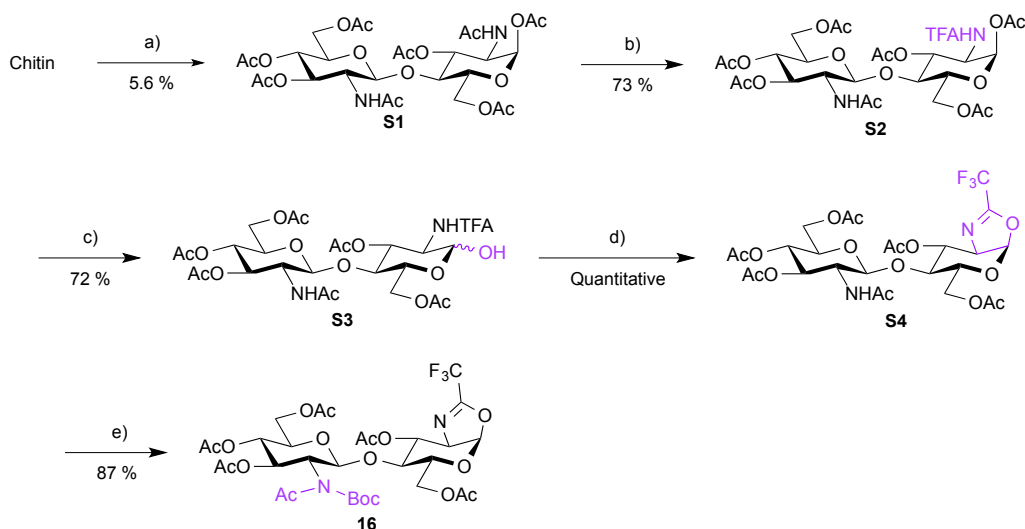

**Preparation of compound 16 from chitin.** (a)  $\text{Ac}_2\text{O}$ ,  $\text{H}_2\text{SO}_4$ , 55 °C, then r.t. then 55 °C ; (b)  $(\text{CF}_3\text{CO})_2\text{O}$ ,  $\text{CH}_3\text{CN}$ , 135 °C, then  $\text{CH}_3\text{OH}$ , r.t. ; (c) ethylenediamine,  $\text{AcOH}$ , THF, r.t. ; (d)  $(\text{CH}_3\text{SO}_2)_2\text{O}$ ,  $\text{CH}_3\text{CN}$ , r.t. then  $\text{Et}_3\text{N}$ , r.t. ; (e)  $\text{Boc}_2\text{O}$ , 4-DMAP, THF, 85 °C.

**2-Acetamido-3,4,6-tri-O-acetyl-2-deoxy- $\beta$ -D-glucopyranosyl-(1 $\rightarrow$ 4)-2-acetamido-1,3,6-tri-O-acetyl-2-deoxy- $\alpha$ -D-glucopyranoside<sup>7</sup> (S1).**

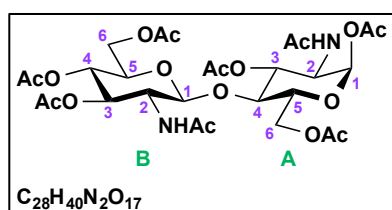

To an ice-cold mixture of acetic anhydride (400 mL) and sulfuric acid (40 mL) was added chitin (80 g) portion-wise. The suspension was stirred at 55°C for 3 hours to give a heterogeneous brown mixture, kept at room temperature for 14 hours and then heated at 55°C for 1 hour to give a homogenous solution. This mixture

was then poured into an ice-cold solution of sodium acetate in water (1.6 L, 100 g/L). The resulting solid was filtered off. The filtrate was extracted with  $\text{CH}_2\text{Cl}_2$  (3 x 2 L). The combined organic layers were washed with an ice-cold saturated  $\text{NaHCO}_3$  solution (6 L), dried over  $\text{Na}_2\text{SO}_4$ , filtered and concentrated to afford a yellow solid (73 g). The residue was purified by silica gel chromatography ( $\text{CH}_2\text{Cl}_2$ /acetone: from 9:1 to 1:9) to afford four fractions. After concentration, the first three fractions were recrystallized from  $\text{CH}_3\text{OH}/\text{Et}_2\text{O}$ . The second fraction was identified as peracetylated  $\alpha$ -GlcNAc **S1** (7.5 g, 5.6%) obtained as a white solid. The first and third fractions were respectively identified as peracetylated  $\alpha$ -chitose (3.8 g, 2.5%) and peracetylated  $\alpha$ -chitotriose (5.8 g, 4.6%). The highly impure fourth fraction contained longer chitooligosaccharides. **Rf**: 0.60 ( $\text{CH}_2\text{Cl}_2$ /acetone 1:1).

**$^1\text{H}$  NMR (500 MHz,  $\text{CDCl}_3$ )**  $\delta$ : 6.07 (d, 1H,  $J_{1,2}^{\text{A,A}}$  3.5 Hz, **H-1<sup>A</sup>**); 6.00 (d, 1H,  $J_{\text{NH},2}^{\text{B,B}}$  9.2 Hz, **NH<sup>B</sup>**); 5.64 (d, 1H,  $J_{\text{NH},2}^{\text{A,A}}$  9.0 Hz, **NH<sup>A</sup>**); 5.20 (dd, 1H,  $J_{2,3}^{\text{A,A}}$  10.8,  $J_{3,4}^{\text{A,A}}$  9.3 Hz, **H-3<sup>A</sup>**); 5.10 (dd, 1H,  $J_{2,3}^{\text{B,B}}$  10.1,  $J_{3,4}^{\text{B,B}}$  9.6 Hz, **H-3<sup>B</sup>**); 5.03 (dd, 1H,  $J_{3,4}^{\text{B,B}}$  9.6,  $J_{4,5}^{\text{B,B}}$  9.6 Hz, **H-4<sup>B</sup>**); 4.44 (d, 1H,  $J_{1,2}^{\text{B,B}}$  8.6 Hz, **H-1<sup>B</sup>**); 4.42 (dd, 1H,  $^2J_{6a,6b}^{\text{A,A}}$  12.2,  $J_{5,6a}^{\text{A,A}}$  3.5 Hz, **H-6a<sup>A</sup>**); 4.36 (dd, 1H,  $^2J_{6a,6b}^{\text{B,B}}$  12.4,  $J_{5,6a}^{\text{B,B}}$  4.4 Hz, **H-6a<sup>B</sup>**); 4.34 (ddd, 1H,  $J_{2,3}^{\text{A,A}}$

10.8,  $J_{\text{NH},2}^{\text{A},\text{A}}$  9.0,  $J_{1,2}^{\text{A},\text{A}}$  3.5 Hz, **H-2<sup>A</sup>**); 4.16 (dd, 1H,  $^2J_{6a,6b}^{\text{A},\text{A}}$  12.2,  $J_{5,6b}^{\text{A},\text{A}}$  1.5 Hz, **H-6b<sup>A</sup>**); 4.00 (dd, 1H,  $^2J_{6a,6b}^{\text{B},\text{B}}$  12.4,  $J_{5,6b}^{\text{B},\text{B}}$  1.7 Hz, **H-6b<sup>B</sup>**); 3.94 (ddd, 1H,  $J_{2,3}^{\text{B},\text{B}}$  10.1,  $J_{\text{NH},2}^{\text{B},\text{B}}$  9.2,  $J_{1,2}^{\text{B},\text{B}}$  8.6 Hz, **H-2<sup>B</sup>**); 3.87 (ddd, 1H,  $J_{4,5}^{\text{A},\text{A}}$  9.8,  $J_{5,6a}^{\text{A},\text{A}}$  3.5,  $J_{5,6b}^{\text{A},\text{A}}$  1.5 Hz, **H-5<sup>A</sup>**); 3.71 (dd, 1H,  $J_{3,4}^{\text{A},\text{A}}$  9.8,  $J_{4,5}^{\text{A},\text{A}}$  9.3 Hz, **H-4<sup>A</sup>**); 3.60 (ddd, 1H,  $J_{4,5}^{\text{B},\text{B}}$  9.6,  $J_{5,6a}^{\text{B},\text{B}}$  4.4,  $J_{5,6b}^{\text{B},\text{B}}$  1.7 Hz, **H-5<sup>B</sup>**); 2.16-1.90 (8 s, 24H, 8 Ac).  $^{13}\text{C}$  NMR (125 MHz,  $\text{CDCl}_3$ )  $\delta$ : 171.7-169.1 (8 COCH<sub>3</sub>); 102.0 (**C-1<sup>B</sup>**); 90.7 (**C-1<sup>A</sup>**); 76.1 (**C-4<sup>A</sup>**); 72.8 (**C-3<sup>B</sup>**); 72.2 (**C-5<sup>B</sup>**); 71.0 (**C-5<sup>A</sup>**); 70.9 (**C-3<sup>A</sup>**); 68.1 (**C-4<sup>B</sup>**); 61.9 (**C-6<sup>B</sup>**); 61.7 (**C-6<sup>A</sup>**); 54.7 (**C-2<sup>B</sup>**); 51.4 (**C-2<sup>A</sup>**); 23,4-20.8 (8 COCH<sub>3</sub>). Analyses are in accordance with the literature.<sup>7</sup>

**2-Acetamido-3,4,6-tri-O-acetyl-2-deoxy- $\beta$ -D-glucopyranosyl-(1 $\rightarrow$ 4)-1,3,6-tri-O-acetyl-2-deoxy-2-trifluoroacetamido- $\alpha$ -D-glucopyranoside<sup>7</sup> (**S2**).**

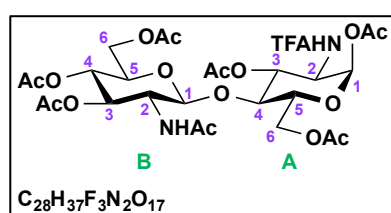

To a solution of peracetylated  $\alpha$ -chitobiose **S1** (800 mg, 1.18 mmol, 1.0 equiv.) in dry  $\text{CH}_3\text{CN}$  (220 mL) was added trifluoroacetic anhydride (1.15 mL, 8.28 mmol, 7.0 equiv.) under an argon atmosphere. The reaction mixture was stirred at 135°C for 7 min

in a sealed tube, then allowed to cool to room temperature, diluted with  $\text{CH}_3\text{OH}$  and stirred for 1 hour. After concentration, the residue was purified by silica gel column chromatography ( $\text{CH}_2\text{Cl}_2$ /methyl *tert*-butyl ether/ $\text{CH}_3\text{OH}$  100:0:0 to 70:28:2) to give product **S2** (631 mg, 73%) as a white amorphous solid. **Rf**: 0.36 ( $\text{CH}_2\text{Cl}_2$ /acetone 4:1).  $^1\text{H}$  NMR (500 MHz,  $\text{CDCl}_3$ )  $\delta$ : 6.72 (d, 1H,  $J_{\text{NH},2}^{\text{A},\text{A}}$  8.7 Hz, **NH<sup>A</sup>**); 6.16 (d, 1H,  $J_{1,2}^{\text{A},\text{A}}$  3.6 Hz, **H-1<sup>A</sup>**); 5.97 (d, 1H,  $J_{\text{NH},2}^{\text{B},\text{B}}$  9.2 Hz, **NH<sup>B</sup>**); 5.28 (dd, 1H,  $J_{2,3}^{\text{A},\text{A}}$  10.9,  $J_{3,4}^{\text{A},\text{A}}$  9.2 Hz, **H-3<sup>A</sup>**); 5.12 (dd, 1H,  $J_{2,3}^{\text{B},\text{B}}$  10.2,  $J_{3,4}^{\text{B},\text{B}}$  9.5 Hz, **H-3<sup>B</sup>**); 5.02 (dd, 1H,  $J_{3,4}^{\text{B},\text{B}}$  9.7,  $J_{4,5}^{\text{B},\text{B}}$  9.5 Hz, **H-4<sup>B</sup>**); 4.48 (d, 1H,  $J_{1,2}^{\text{B},\text{B}}$  8.4 Hz, **H-1<sup>B</sup>**); 4.42 (dd, 1H,  $^2J_{6a,6b}^{\text{A},\text{A}}$  12.2,  $J_{5,6a}^{\text{A},\text{A}}$  3.7 Hz, **H-6a<sup>A</sup>**); 4.37 (dd, 1H,  $^2J_{6a,6b}^{\text{B},\text{B}}$  12.5,  $J_{5,6a}^{\text{B},\text{B}}$  4.2 Hz, **H-6a<sup>B</sup>**); 4.31 (ddd, 1H,  $J_{2,3}^{\text{A},\text{A}}$  10.9,  $J_{\text{NH},2}^{\text{A},\text{A}}$  8.7,  $J_{1,2}^{\text{A},\text{A}}$  3.6 Hz, **H-2<sup>A</sup>**); 4.19 (dd, 1H,  $^2J_{6a,6b}^{\text{A},\text{A}}$  12.2,  $J_{5,6b}^{\text{A},\text{A}}$  1.5 Hz, **H-6b<sup>A</sup>**); 4.00 (dd, 1H,  $^2J_{6a,6b}^{\text{B},\text{B}}$  12.5,  $J_{5,6b}^{\text{B},\text{B}}$  2.2 Hz, **H-6b<sup>B</sup>**); 3.92 (ddd, 1H,  $J_{4,5}^{\text{A},\text{A}}$  9.7,  $J_{5,6a}^{\text{A},\text{A}}$  3.7,  $J_{5,6b}^{\text{A},\text{A}}$  1.5 Hz, **H-5<sup>A</sup>**); 3.91 (ddd, 1H,  $J_{2,3}^{\text{B},\text{B}}$  10.2,  $J_{\text{NH},2}^{\text{B},\text{B}}$  9.2,  $J_{1,2}^{\text{B},\text{B}}$  8.4 Hz, **H-2<sup>B</sup>**); 3.75 (dd, 1H,  $J_{3,4}^{\text{A},\text{A}}$  9.7,  $J_{4,5}^{\text{A},\text{A}}$  9.2 Hz, **H-4<sup>A</sup>**); 3.62 (ddd, 1H,  $J_{4,5}^{\text{B},\text{B}}$  9.7,  $J_{5,6a}^{\text{B},\text{B}}$  4.2,  $J_{5,6b}^{\text{B},\text{B}}$  2.2 Hz, **H-5<sup>B</sup>**); 2.18-1.94 (7 s, 21H, 7 Ac).  $^{13}\text{C}$  NMR (125 MHz,  $\text{CDCl}_3$ )  $\delta$ : 171.8-168.8 (7 COCH<sub>3</sub>); 157.7 ( $^2J_{\text{C},\text{F}}$  38.0 Hz, COCF<sub>3</sub>); 115.6 ( $^1J_{\text{C},\text{F}}$  288 Hz, COCF<sub>3</sub>); 102.0 (**C-1<sup>B</sup>**); 89.7 (**C-1<sup>A</sup>**); 75.9 (**C-4<sup>A</sup>**); 72.7 (**C-3<sup>B</sup>**); 72.3 (**C-5<sup>B</sup>**); 71.1 (**C-5<sup>A</sup>**); 70.3 (**C-3<sup>A</sup>**); 68.1 (**C-4<sup>B</sup>**); 61.9 (**C-6<sup>B</sup>**); 61.5 (**C-6<sup>A</sup>**); 54.8 (**C-2<sup>B</sup>**); 52.2 (**C-2<sup>A</sup>**); 23,4-20.6 (7 COCH<sub>3</sub>). Analyses are in accordance with the literature.<sup>7</sup>

**2-Acetamido-3,4,6-tri-*O*-acetyl-2-deoxy- $\beta$ -D-glucopyranosyl-(1 $\rightarrow$ 4)-3,6-di-*O*-acetyl-2-deoxy-2-trifluoroacetamido-D-glucopyranose<sup>7</sup> (**S3**).**

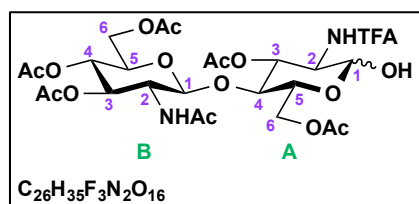

To a solution of ethylenediamine (52  $\mu$ L, 0.78 mmol, 1.2 equiv.) in dry THF (500  $\mu$ L) was added acetic acid (45  $\mu$ L, 0.78 mmol, 1.2 equiv.) at 0°C. The reaction mixture was stirred at room temperature for 30 min. A white salt was formed and a

suspension of **S2** (465 mg, 0.64 mmol, 1.0 equiv.) in dry THF (3 mL) was added. The reaction mixture was stirred at room temperature for 22 hours. The mixture was concentrated and the residue was purified by silica gel column chromatography (CH<sub>2</sub>Cl<sub>2</sub>/CH<sub>3</sub>OH 10:0 to 9:1) to give product **S3** (317 mg,  $\alpha/\beta$  mixture, 72%) as a white amorphous solid. **Rf  $\alpha$  isomer:** 0.34 (CH<sub>2</sub>Cl<sub>2</sub>/CH<sub>3</sub>OH 95:5), **Rf  $\beta$  isomer:** 0.21 (CH<sub>2</sub>Cl<sub>2</sub>/CH<sub>3</sub>OH 95:5).  $\alpha/\beta$  mixture 4:1 (H<sub>2</sub>O + CH<sub>3</sub>CN +  $\epsilon$ HCO<sub>2</sub>H, UPLC analysis). **<sup>1</sup>H NMR  $\alpha$  isomer (500 MHz, CDCl<sub>3</sub>)**  $\delta$ : 8.11 (d, 1H,  $J_{NH^A,2^A}$  9.7 Hz, NH<sup>A</sup>); 6.00 (d, 1H,  $J_{NH^B,2^B}$  8.6 Hz, NH<sup>B</sup>); 5.75 (dd, 1H,  $J_{2^A,3^A}$  10.9,  $J_{3^A,4^A}$  9.3 Hz, H-3<sup>A</sup>); 5.42 (brd, 1H,  $J_{OH,1^A}$  2.8 Hz, OH); 5.27 (brdd, 1H,  $J_{1^A,2^A}$  3.6,  $J_{OH,1^A}$  2.8 Hz, H-1<sup>A</sup>); 5.05 (dd, 1H,  $J_{4^B,5^B}$  9.7,  $J_{3^B,4^B}$  9.5 Hz, H-4<sup>B</sup>); 4.94 (dd, 1H,  $J_{2^B,3^B}$  10.0,  $J_{3^B,4^B}$  9.5 Hz, H-3<sup>B</sup>); 4.41 (dd, 1H,  $J_{6a^B,6b^B}$  12.4,  $J_{5^B,6a^B}$  4.2 Hz, H-6a<sup>B</sup>); 4.32 (dd, 1H,  $J_{6a^A,6b^A}$  11.9,  $J_{5^A,6a^A}$  3.7 Hz, H-6a<sup>A</sup>); 4.29 (ddd, 1H,  $J_{2^A,3^A}$  10.9,  $J_{NH^A,2^A}$  9.7,  $J_{1^A,2^A}$  3.1 Hz, H-2<sup>A</sup>); 4.12 (dd, 1H,  $J_{6a^A,6b^A}$  11.9,  $J_{5^A,6b^A}$  1.8 Hz, H-6b<sup>A</sup>); 4.11-4.04 (m, 2H, H-2<sup>B</sup> and H-1<sup>B</sup>); 4.05 (ddd, 1H,  $J_{4^A,5^A}$  9.8,  $J_{5^A,6a^A}$  3.7,  $J_{5^A,6b^A}$  1.8 Hz, H-5<sup>A</sup>); 4.00 (dd, 1H,  $J_{6a^B,6b^B}$  12.4,  $J_{5^B,6b^B}$  1.7 Hz, H-6b<sup>B</sup>); 3.60 (dd, 1H,  $J_{4^A,5^A}$  9.8,  $J_{3^A,4^A}$  9.3 Hz, H-4<sup>A</sup>); 3.55 (ddd, 1H,  $J_{4^B,5^B}$  9.7,  $J_{5^B,6a^B}$  4.2,  $J_{5^B,6b^B}$  1.7 Hz, H-5<sup>B</sup>); 2.14-1.92 (6 s, 18H, 6 Ac). **<sup>13</sup>C NMR  $\alpha$  isomer (125 MHz, CDCl<sub>3</sub>)**  $\delta$ : 172.1-169.4 (6 COCH<sub>3</sub>); 102.6 (C-1<sup>B</sup>); 91.4 (C-1<sup>A</sup>); 77.0 (C-4<sup>A</sup>); 72.4 (C-3<sup>B</sup>); 72.1 (C-5<sup>B</sup>); 69.8 (C-3<sup>A</sup>); 68.8 (C-5<sup>A</sup>); 67.8 (C-4<sup>B</sup>); 62.2 (C-6<sup>A</sup>); 61.7 (C-6<sup>B</sup>); 54.5 (C-2<sup>B</sup>); 52.9 (C-2<sup>A</sup>); 23,4-20.2 (6 COCH<sub>3</sub>). **HRMS (ESI<sup>+</sup>):** calculated for C<sub>26</sub>H<sub>36</sub>F<sub>3</sub>N<sub>2</sub>O<sub>16</sub><sup>+</sup> 689.2011 [M+H<sup>+</sup>]; found 689.1989. **IR:**  $\nu$  (cm<sup>-1</sup>) = 3300, 1741, 1714, 1663, 1371, 1227, 1181, 1160, 1040.

**2-Trifluoromethyl-[[2-(*N*-acetyl-*tert*-butyloxycarbonylamino)-3,4,6-tri-*O*-acetyl-2-deoxy- $\beta$ -D-glucopyranosyl]-(1 $\rightarrow$ 4)-3,6-di-*O*-acetyl-1,2-dideoxy- $\alpha$ -D-glucopyranoso][2,1-*d*]oxazoline<sup>7</sup> (**16**).**

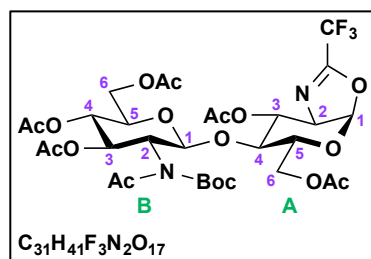

To a solution of compound **S3** (314 mg, 0.46 mmol, 1 equiv.) in dry CH<sub>3</sub>CN (7.5 mL) was added methanesulfonic anhydride (238 mg, 1.4 mmol, 3 equiv.) under an argon atmosphere. The reaction mixture was stirred at room temperature for 35 min to form a mesyl intermediate. Triethylamine (1.3 mL, 9.1 mmol, 20 equiv.) was then added and the reaction mixture was stirred at room temperature for 2 hours. The mixture was

diluted with CH<sub>2</sub>Cl<sub>2</sub> and washed with saturated NaHCO<sub>3</sub> solution (50 mL). The aqueous layer was then extracted with CH<sub>2</sub>Cl<sub>2</sub> (3 x 50 mL). The combined organic layers were washed with brine (50 mL), dried over Na<sub>2</sub>SO<sub>4</sub>, filtered and concentrated to give oxazoline **S4** product (325 mg, quantitative yield) as a yellow solid. A solution of this solid **S4** in dry THF (3.1 mL) was then treated with di-*tert*-butyl dicarbonate (Boc<sub>2</sub>O) (524 μL, 2.3 mmol, 5.0 equiv.) and 4-dimethylaminopyridine (4-DMAP) (11 mg, 0.091 mmol, 0.2 equiv.) under an argon atmosphere. The reaction mixture was stirred at room temperature for 30 min and then concentrated. The residue was purified by silica gel column chromatography (CH<sub>2</sub>Cl<sub>2</sub>/CH<sub>3</sub>OH 100:0 to 98:2) to give product **16** (306 mg, 87%) as a yellow oil. **Rf**: 0.56 (Heptane/EtOAc 3:7).  $[\alpha]_D^{20} = -6.20$  ( $c = 1.00$ , CHCl<sub>3</sub>). **<sup>1</sup>H NMR (500 MHz, CD<sub>3</sub>CN, 70 °C)** δ: 6.27 (d, 1H,  $J_{1,2}^{A,A} 7.5$  Hz, **H-1<sup>A</sup>**); 5.63 (dd, 1H,  $J_{2,3}^{B,B} 10.6$ ,  $J_{3,4}^{B,B} 8.8$  Hz, **H-3<sup>B</sup>**); 5.62 (dd, 1H,  $J_{2,3}^{A,A} 2.5$ ,  $J_{3,4}^{A,A} 1.5$  Hz, **H-3<sup>A</sup>**); 5.40 (brs, 1H, **H-1<sup>B</sup>**); 4.99 (dd, 1H,  $J_{4,5}^{B,B} 10.1$ ,  $J_{3,4}^{B,B} 8.8$  Hz, **H-4<sup>B</sup>**); 4.41 (ddd, 1H,  $J_{1,2}^{A,A} 7.5$ ,  $J_{2,3}^{A,A} 2.5$  Hz, **H-2<sup>A</sup>**); 4.24 (dd, 1H,  $^2J_{6a,6b}^{B,B} 12.2$ ,  $J_{5,6a}^{B,B} 4.7$  Hz, **H-6a<sup>B</sup>**); 4.19 (brd, 1H,  $^2J_{6a,6b}^{A,A} 12.4$  Hz, **H-6a<sup>A</sup>**); 4.13 (dd, 1H,  $^2J_{6a,6b}^{B,B} 12.2$ ,  $J_{5,6b}^{B,B} 2.7$  Hz, **H-6b<sup>B</sup>**); 4.01 (dd, 1H,  $^2J_{6a,6b}^{A,A} 12.4$ ,  $J_{5,6b}^{A,A} 6.2$  Hz, **H-6b<sup>A</sup>**); 3.82 (ddd, 1H,  $J_{4,5}^{B,B} 10.1$ ,  $J_{5,6a}^{B,B} 4.7$ ,  $J_{5,6b}^{B,B} 2.7$  Hz, **H-5<sup>B</sup>**); 3.79 (dd, 1H,  $J_{4,5}^{A,A} 9.1$ ,  $J_{3,4}^{A,A} 1.5$  Hz, **H-4<sup>A</sup>**); 3.42 (ddd, 1H,  $J_{4,5}^{A,A} 9.1$ ,  $J_{5,6a}^{A,A} 6.2$ ,  $J_{5,6b}^{A,A} 1.9$  Hz, **H-5<sup>A</sup>**); 2.30-1.93 (6 s, 18H, 6 **Ac**); 1.54 (s, 9H, **Boc**). **<sup>13</sup>C NMR (125 MHz, CD<sub>3</sub>CN, 70 °C)** δ: 172.1-171.1(6 COCH<sub>3</sub>); 157.4 (q,  $^2J_{C,F} 40.0$  Hz, OCNCF<sub>3</sub>); 118.2 (q,  $^1J_{C,F} 274$  Hz, OCNCF<sub>3</sub>); 104.4 (**C-1<sup>A</sup>**); 103.3 (**C-1<sup>B</sup>**); 86.8 (brs, **C(CH<sub>3</sub>)<sub>3</sub>**); 78.6 (**C-4<sup>A</sup>**); 73.9 (**C-5<sup>B</sup>**); 72.4 (brs, **C-3<sup>B</sup>**); 71.8 (**C-4<sup>B</sup>**); 71.5 (**C-3<sup>A</sup>**); 70.9 (**C-5<sup>A</sup>**); 66.2 (**C-2<sup>A</sup>**); 65.1 (**C-6<sup>A</sup>**); 64.0 (**C-6<sup>B</sup>**); 29.1 (3C, **C(CH<sub>3</sub>)<sub>3</sub>**); 27.9 (brs, COCH<sub>3</sub> NAc); 21.9-21.5 (5 COCH<sub>3</sub> OAc). **HRMS (ESI<sup>+</sup>)**: calculated for C<sub>26</sub>H<sub>34</sub>F<sub>3</sub>N<sub>2</sub>O<sub>15</sub><sup>+</sup> 671.1906 [M-Boc+H<sup>+</sup>]; found 671.1925. **IR**: ν (cm<sup>-1</sup>) = 2980, 1744, 1690, 1370, 1227, 1154, 1043. Analyses are in accordance with the literature.<sup>7</sup>

### 2,5-Dioxopyrrolidin-1-yl palmitate<sup>8</sup> (**21**).

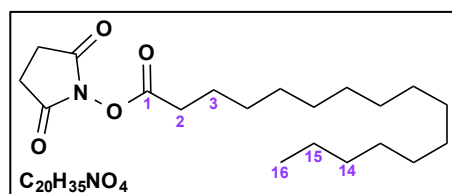

Solutions of palmitic acid (100 mg, 0.39 mmol, 1.0 equiv.) in dry THF (600 μL), *N*-hydroxysuccinimide (63 mg, 0.55 mmol, 1.4 equiv.) in dry THF (900 μL) and *N,N'*-dicyclohexylcarbodiimide (129 mg, 0.62 mmol, 1.6 equiv.) in

dry THF (700 μL) were mixed and stirred at room temperature under an argon atmosphere for 2 days. The mixture was then filtered and concentrated. The residue was resuspended in EtOAc and left overnight at 4°C. The precipitate was filtered again and the filtrate was concentrated. The crude residue was purified by silica gel column chromatography (CH<sub>2</sub>Cl<sub>2</sub>/CH<sub>3</sub>OH 100:0 to 96:4) to afford product **21** (113 mg, 82%) as a white amorphous solid. **<sup>1</sup>H NMR (500 MHz, CDCl<sub>3</sub>)** δ: 2.81 (brs, 4H, 2 CH<sub>2</sub>succi); 2.58 (t, 2H,  $J_{2,3} 7.5$  Hz, **H-2**); 1.72 (tt, 2H,  $J_{2,3} 7.5$ ,  $J_{3,4} 7.5$  Hz, **H-3**); 1.38 (brtt, 2H,  $J_{3,4} 7.5$ ,  $J_{4,5} 7.5$  Hz, **H-4**); 1.33-1.19 (m, 22H, **H-5** to **H-15**); 0.86 (t, 3H,  $J_{15,16} 6.8$  Hz, **H-16**). **<sup>13</sup>C NMR (125 MHz,**

$\text{CDCl}_3$ )  $\delta$ : 169.4, 168.9 (C=Osucci and C-1); 32.2 (C-14); 31.2 (C-2); 30.0-29.0 (C-4 to C-13); 25.8 ( $\text{CH}_2$ succi); 24.8 (C-3); 22.9 (C-15); 14.3 (C-16). Analyses are in accordance with the literature.<sup>8</sup>

### 2,5-Dioxopyrrolidin-1-yl oleate<sup>9</sup> (22).

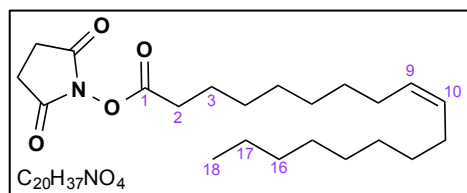

To a mixture of oleic acid (112  $\mu\text{L}$ , 0.35 mmol, 1.0 equiv.), *N,N'*-dicyclohexylcarbodiimide (80 mg, 0.39 mmol, 1.1 equiv.) and 4-pyrrolydinopyridine (5 mg, 0.035 mmol, 0.1 equiv.) in dry THF (1.0 mL) was added, at 0°C, under an

argon atmosphere, a solution of *N*-hydroxysuccinimide (81 mg, 0.71 mmol, 2.0 equiv.) in dry THF (0.4 mL). The reaction mixture was stirred at 0°C for 2 hours and then at room temperature for 2 days. The mixture was then filtered and concentrated. The residue was resuspended in EtOAc and left overnight at 4°C. The precipitate was filtered again and the filtrate was concentrated. The crude residue was purified by silica gel column chromatography ( $\text{CH}_2\text{Cl}_2/\text{CH}_3\text{OH}$  100:0 to 98:2) to afford product **22** (108 mg, 81%) as a colorless gel. **Rf**: 0.89 ( $\text{CH}_2\text{Cl}_2/\text{EtOAc}$  9:1).  **$^1\text{H}$  NMR (500 MHz,  $\text{CDCl}_3$ )**  $\delta$ : 5.37-5.27 (m, 2H, H-9 and H-10); 2.81 (brs, 4H, 2  $\text{CH}_2$ succi); 2.58 (t, 2H,  $J_{2,3}$  7.5 Hz, H-2); 2.03-1.95 (m, 4H, H-8 and H-11); 1.72 (tt, 2H,  $J_{2,3}$  7.5,  $J_{3,4}$  7.5 Hz, H-3); 1.43-1.35 (m, 2H, H-4); 1.35-1.20 (m, 18H, H-5 to H-7 and H-12 to H-17); 0.86 (t, 3H,  $J_{17,18}$  6.9 Hz, H-18).  **$^{13}\text{C}$  NMR (125 MHz,  $\text{CDCl}_3$ )**  $\delta$ : 169.3, 168.9 (C=Osucci and C-1); 130.3, 129.9 (C-9 and C-10); 32.1 (C-16); 31.2 (C-2); 30.0-29.0 (C-4 to C-7 and C-12 to C-15); 27.5, 27.4 (C-8 and C-11); 25.8 ( $\text{CH}_2$ succi); 24.8 (C-3); 22.9 (C-17); 14.3 (C-18). Analyses are in accordance with the literature.<sup>9</sup>

### References:

1. A. Lubineau and H. Bienaymé, *Carbohydr. Res.*, 1991, **212**, 267-271.
2. H. Myszka, D. Bednarczyk, M. Najder and W. Ç. Kaca, *Carbohydr. Res.*, 2003, **338**, 133-141.
3. A. V. Gudmundsdottir and M. Nitz, *Org. Lett.*, 2008, **10**, 3461-3463.
4. S. S. Rana, J. J. Barlow and K. L. Matta, *Carbohydr. Res.*, 1981, **96**, 231-239.
5. A. Hasegawa and H. G. Fletcher Jr, *Carbohydr. Res.*, 1973, **29**, 209-222.
6. J. Yoshimura, M. Funabashi, S. Ishige and T. Sato, *Bull. Chem. Soc. Jpn.*, 1966, **39**, 1760-1764.
7. G. Despras, A. Alix, D. Urban, B. Vauzeilles and J.-M. Beau, *Angew. Chem. Int. Ed.*, 2014, **53**, 11912-11916.
8. G. Shen, H. Fang, Y. Song, A. A. Bielska, Z. Wang and J.-S. A. Taylor, *Bioconjugate Chem.*, 2009, **20**, 1729-1736.
9. K. Vávrová, A. Hrabálek, P. Doležal, L. Šámalová, K. Palát, J. Zbytovská, T. Holas and J. Klimentová, *Bioorg. Med. Chem.*, 2003, **11**, 5381-5390.

Compound (10) <sup>1</sup>H NMR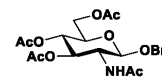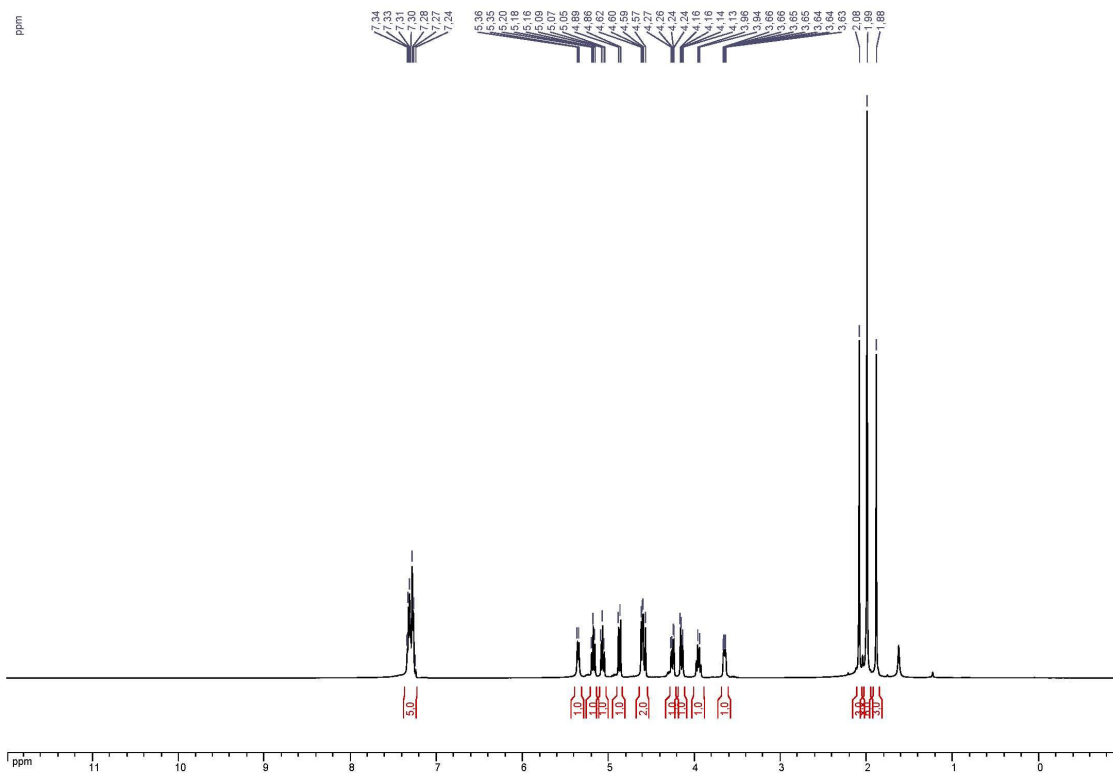Compound (10) <sup>13</sup>C NMR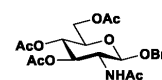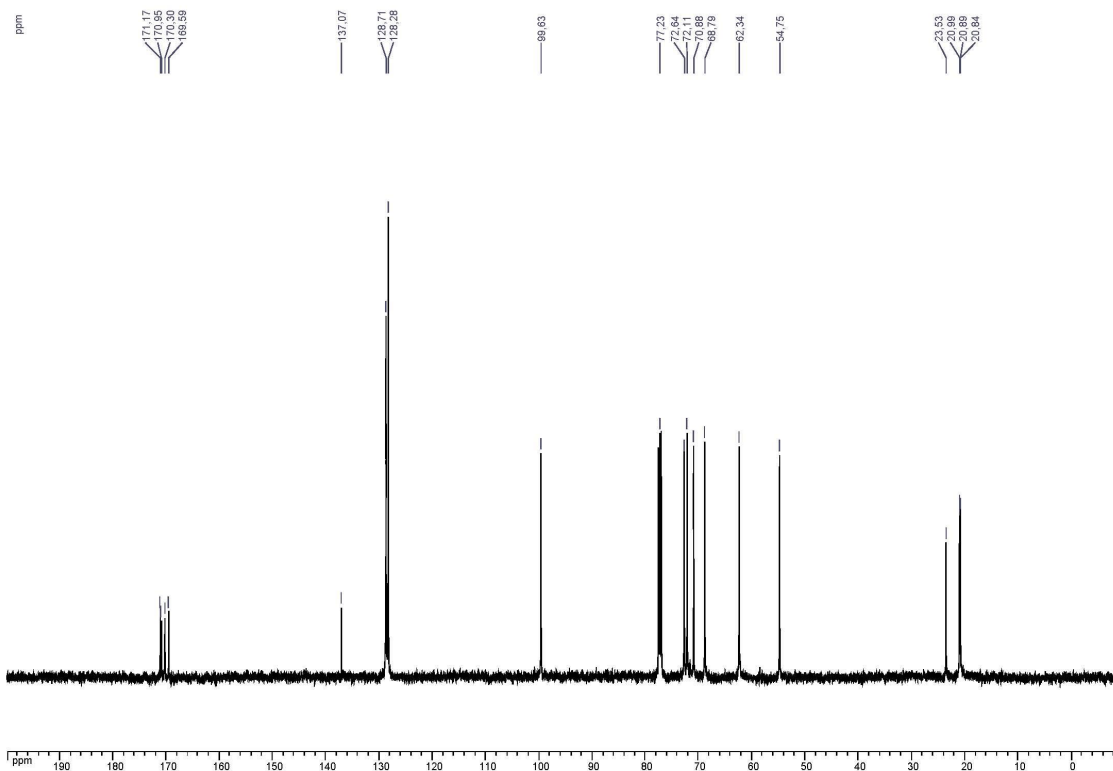



Compound (11) <sup>1</sup>H NMR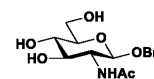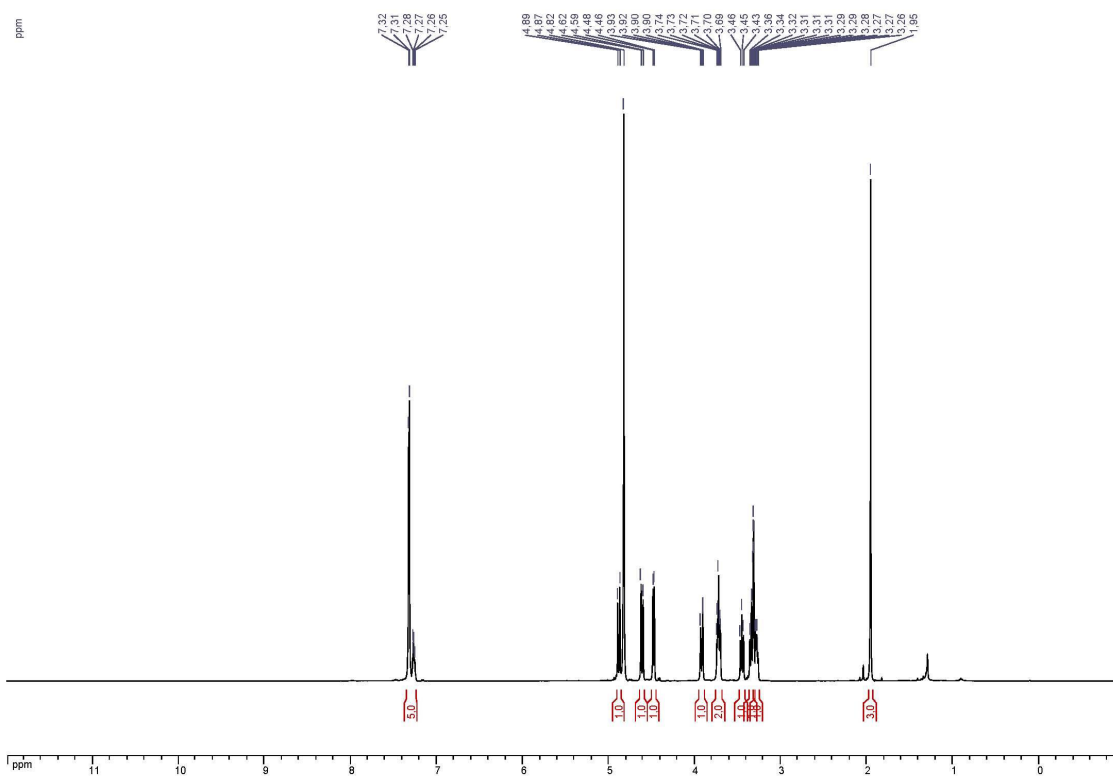Compound (11) <sup>13</sup>C NMR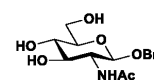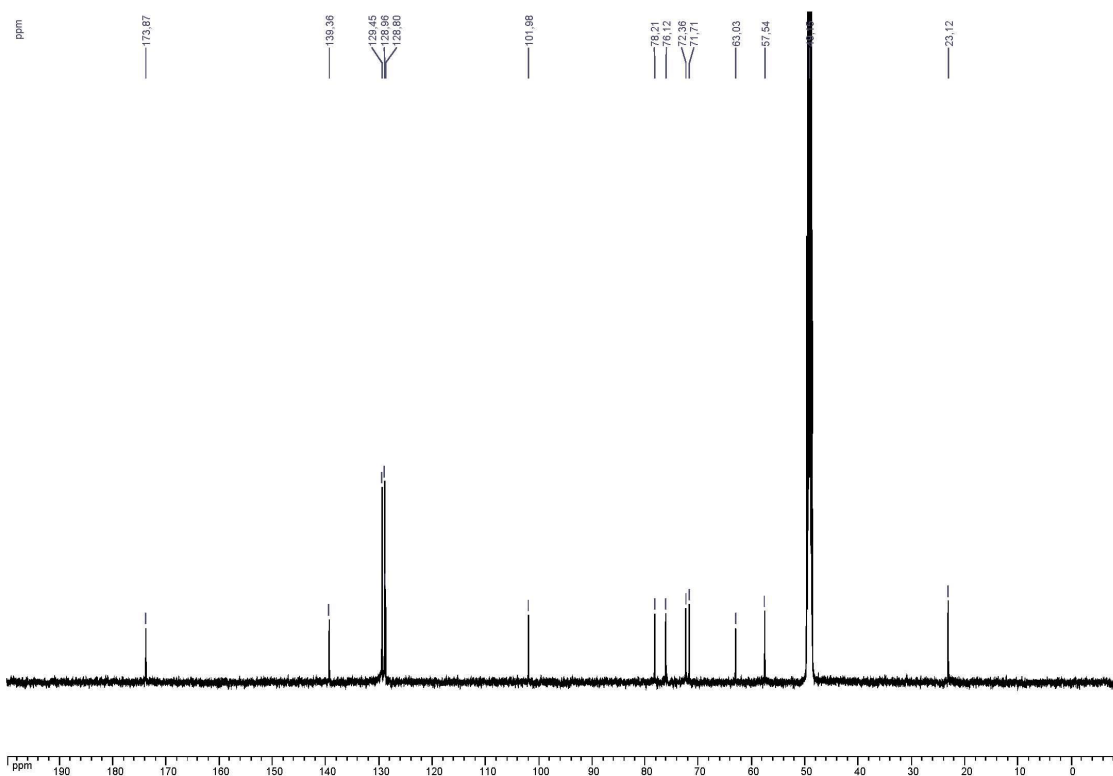

Compound (12)  $^1\text{H}$  NMR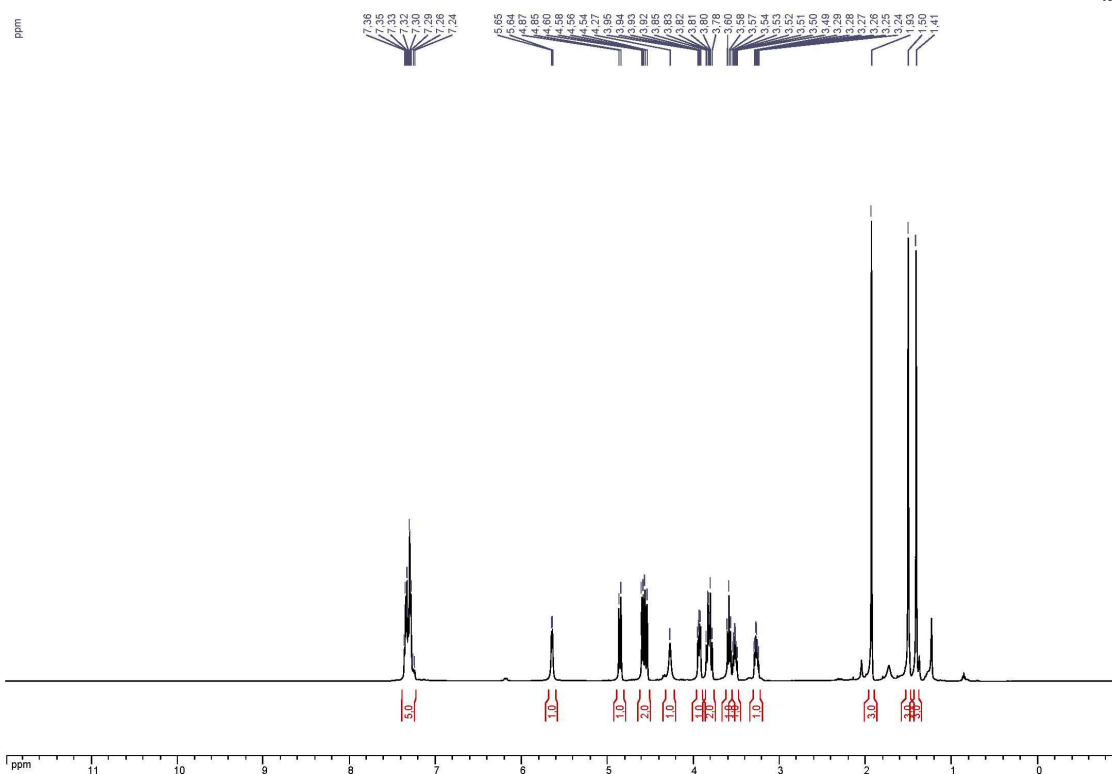Compound (12)  $^{13}\text{C}$  NMR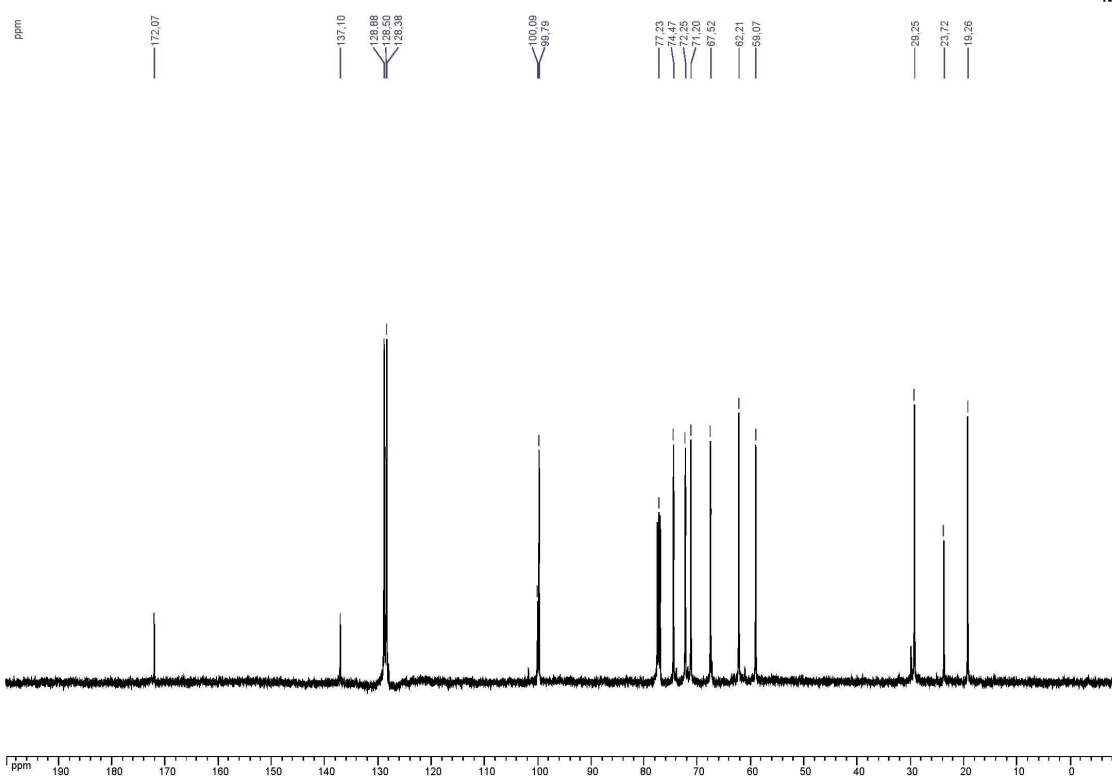

Compound (13)  $^1\text{H}$  NMR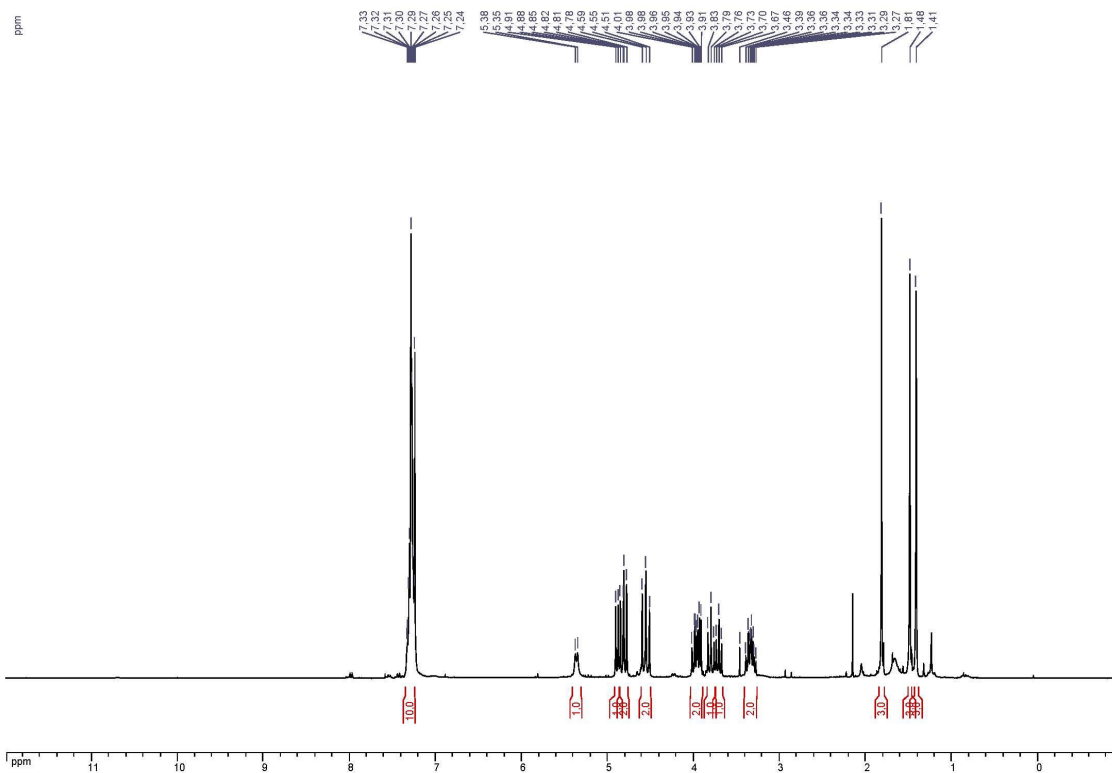Compound (13)  $^{13}\text{C}$  NMR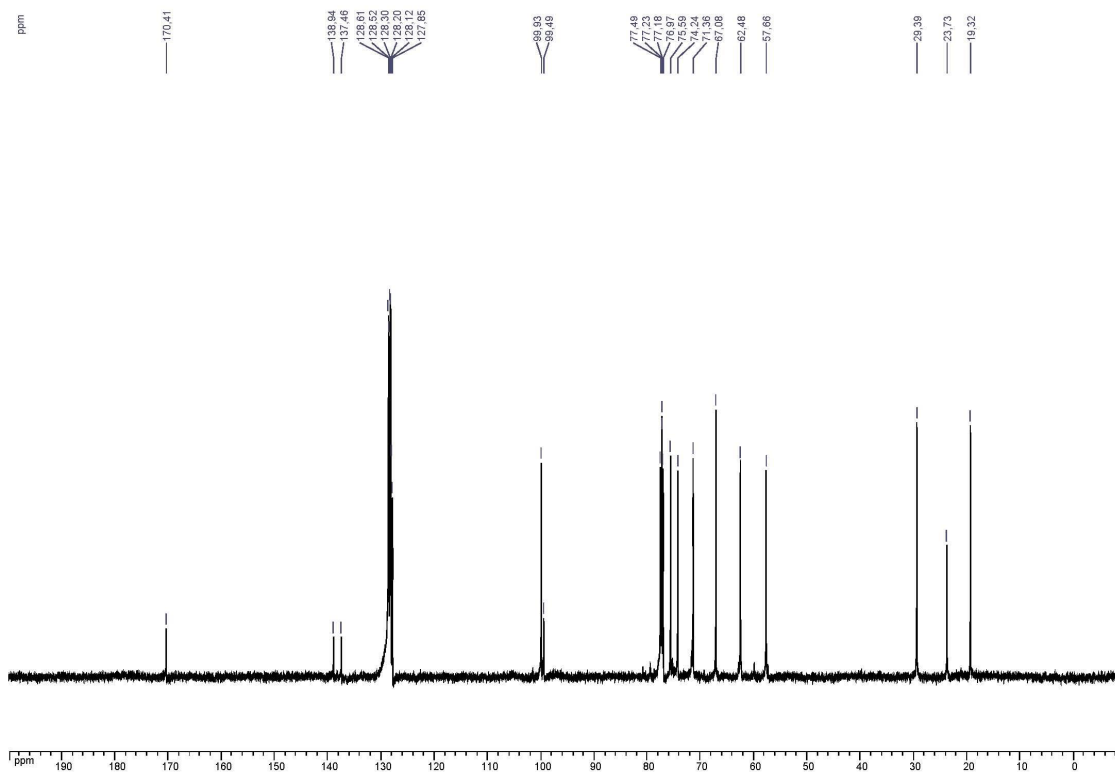

Compound (14) <sup>1</sup>H NMR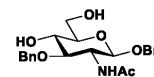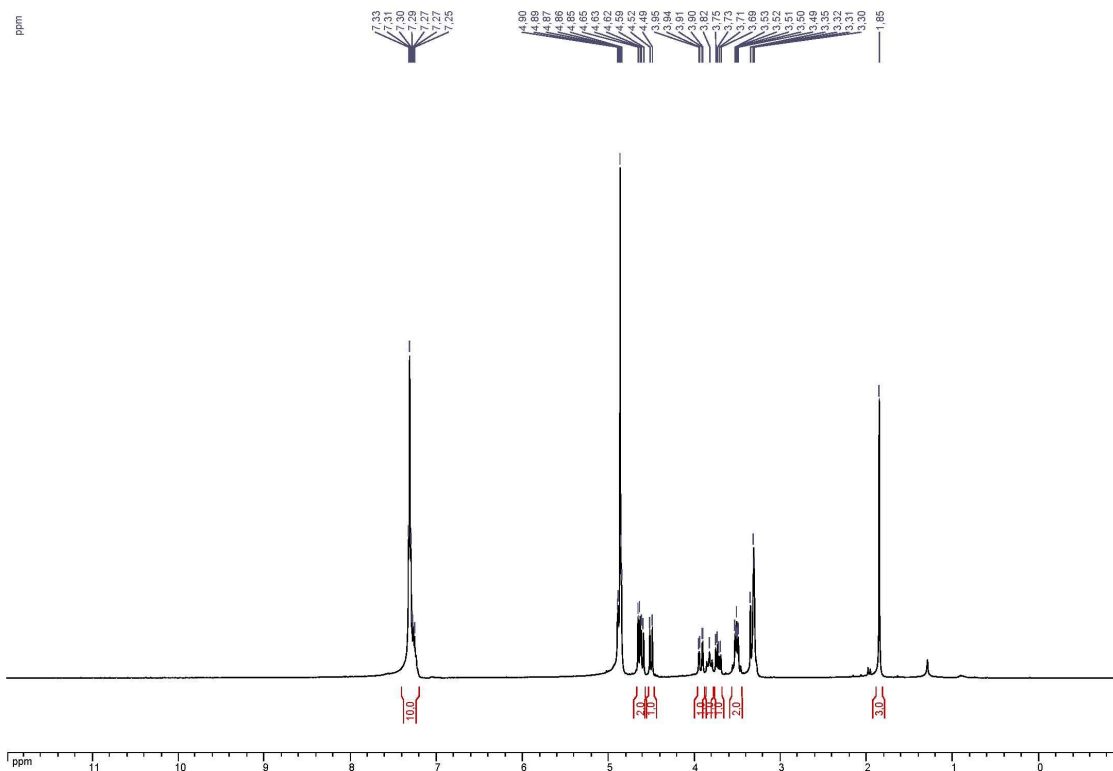Compound (14) <sup>13</sup>C NMR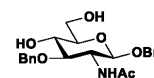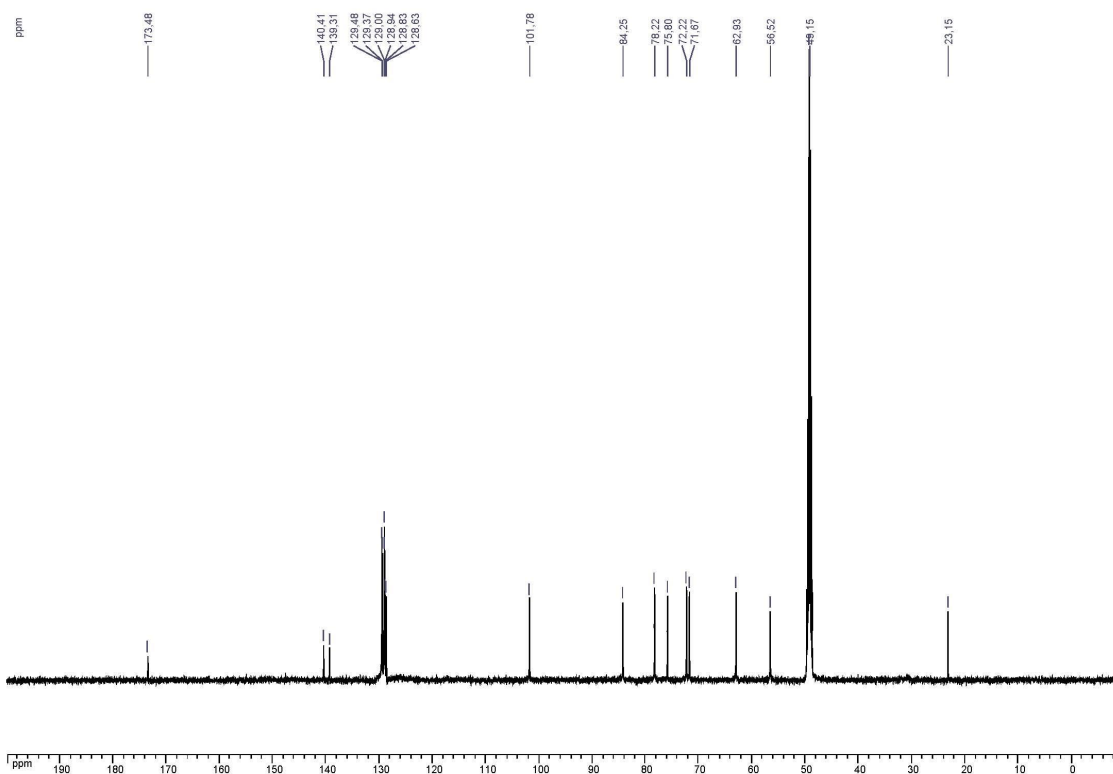



Compound (15)  $^{13}\text{C}$  NMR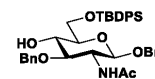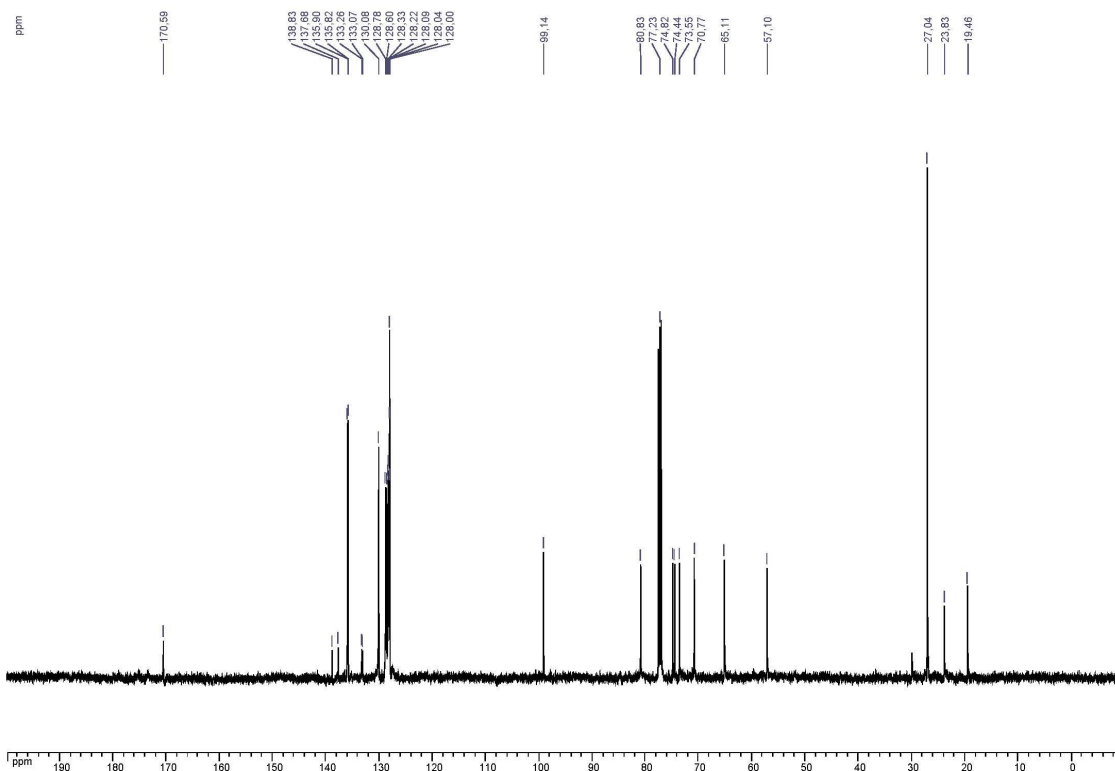

## Compound (15) HSQC NMR

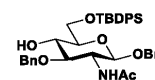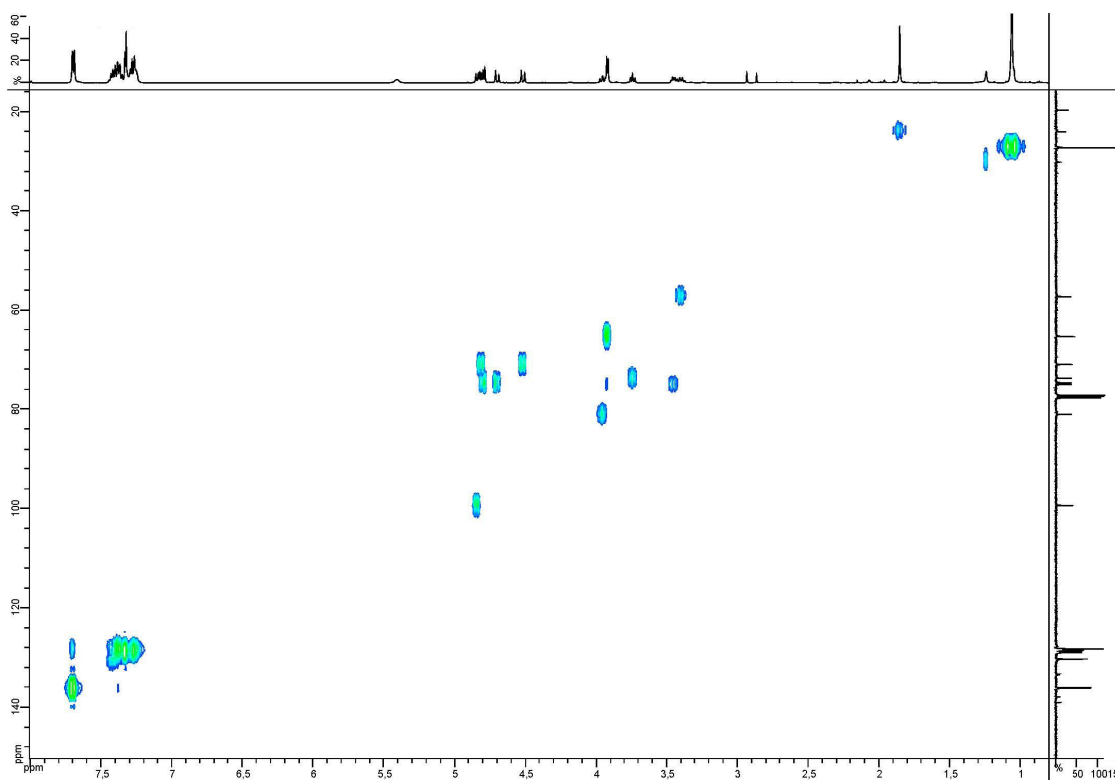

## Compound (15) HMBC NMR

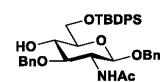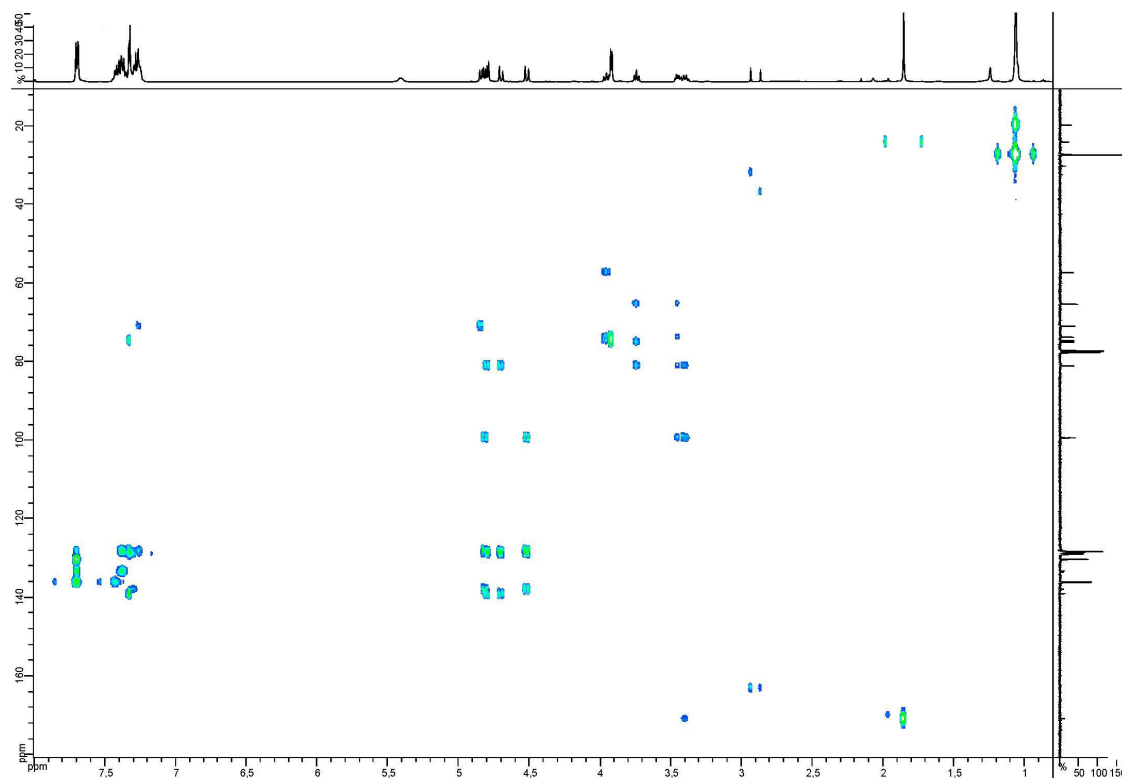

Compound (8)  $^1\text{H}$  NMR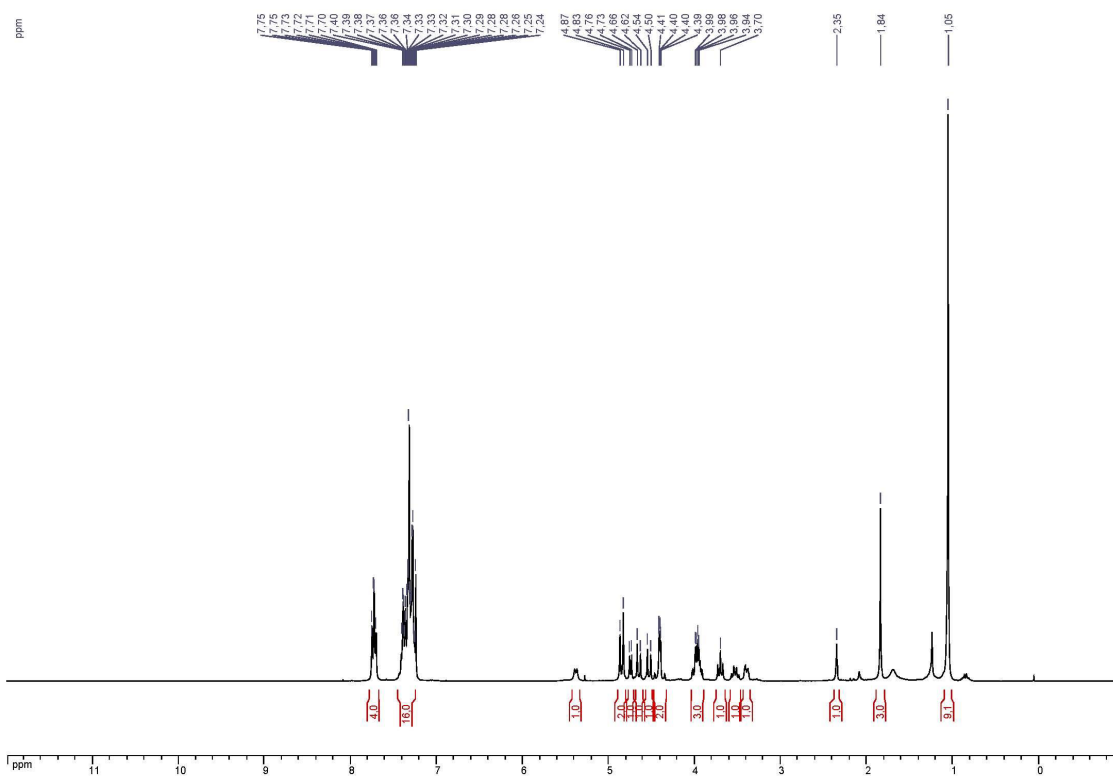

## Compound (8) COSY NMR

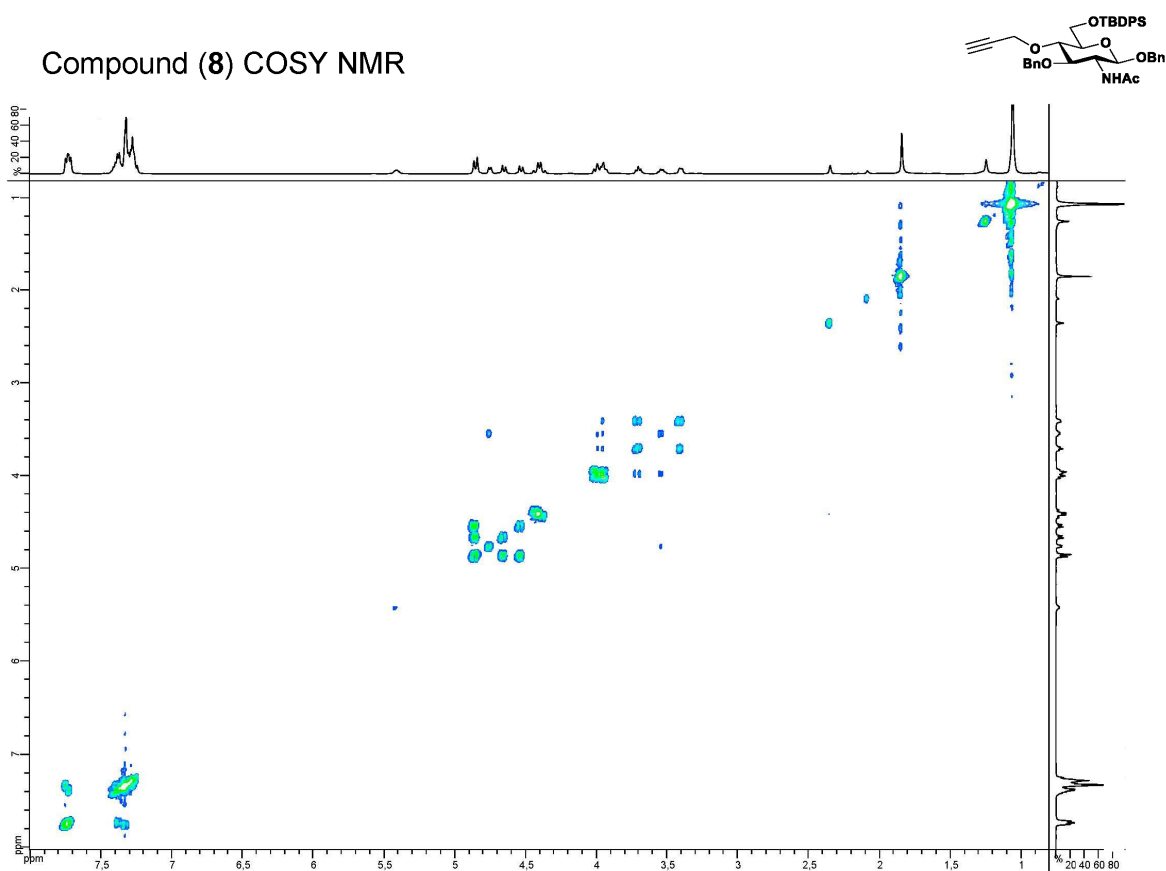



Compound (8)  $^{13}\text{C}$  NMR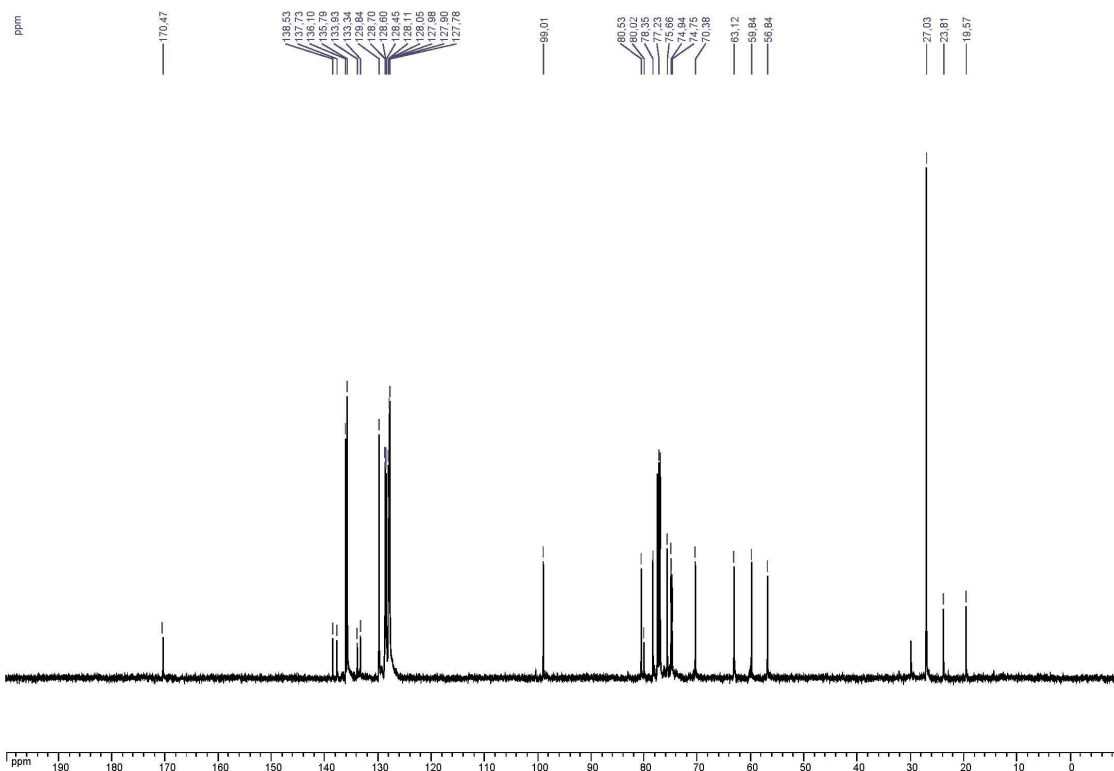

## Compound (8) HSQC NMR

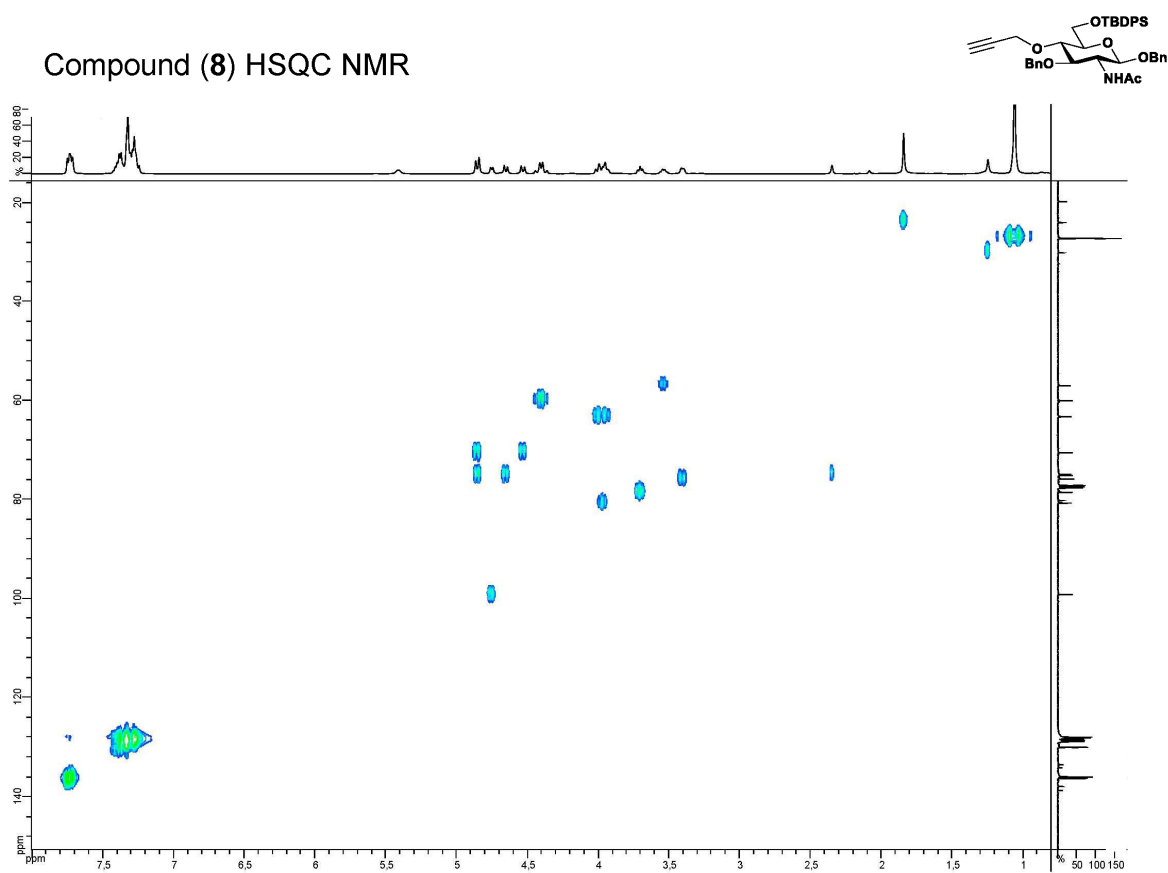

## Compound (8) HMBC NMR

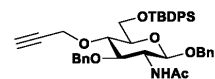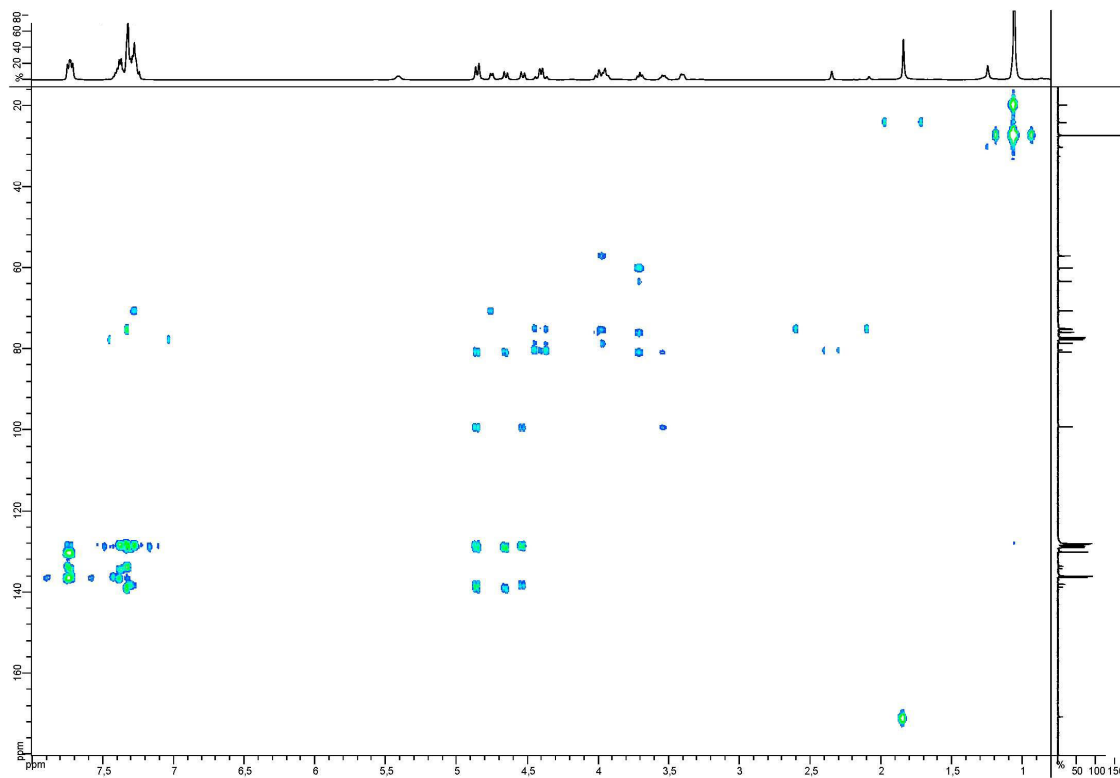

Compound (7)  $^1\text{H}$  NMR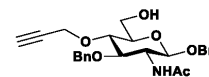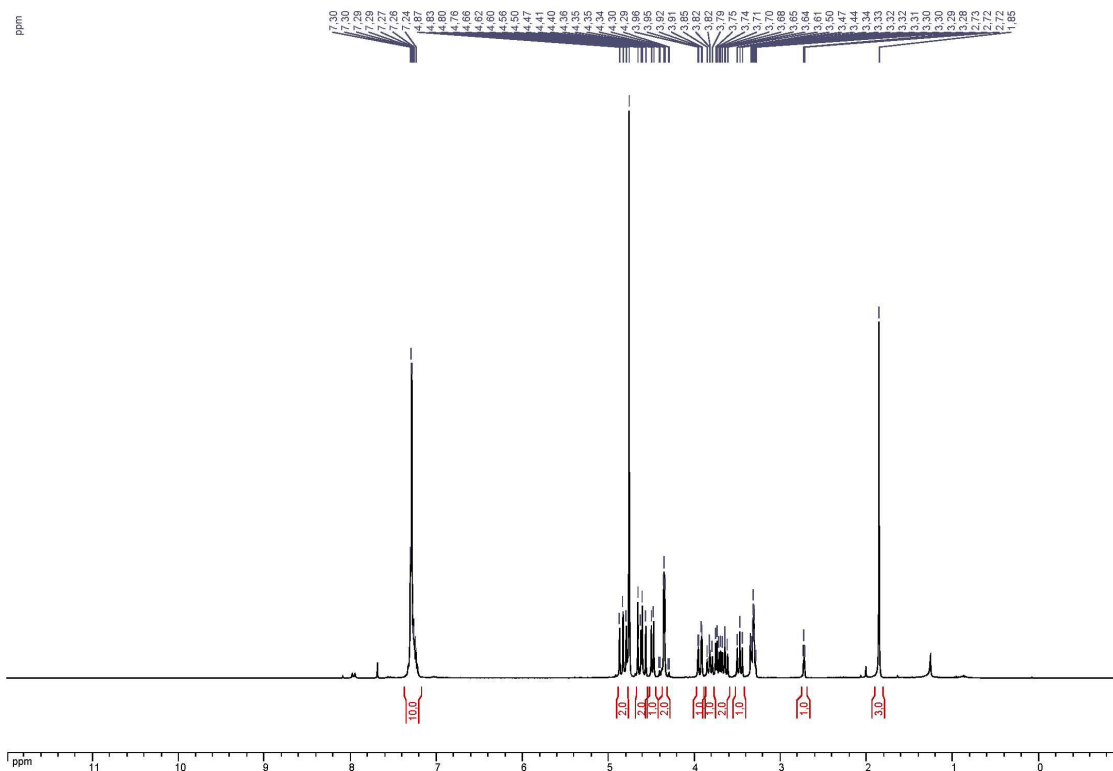Compound (7)  $^1\text{H}$  NMR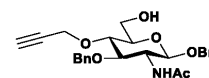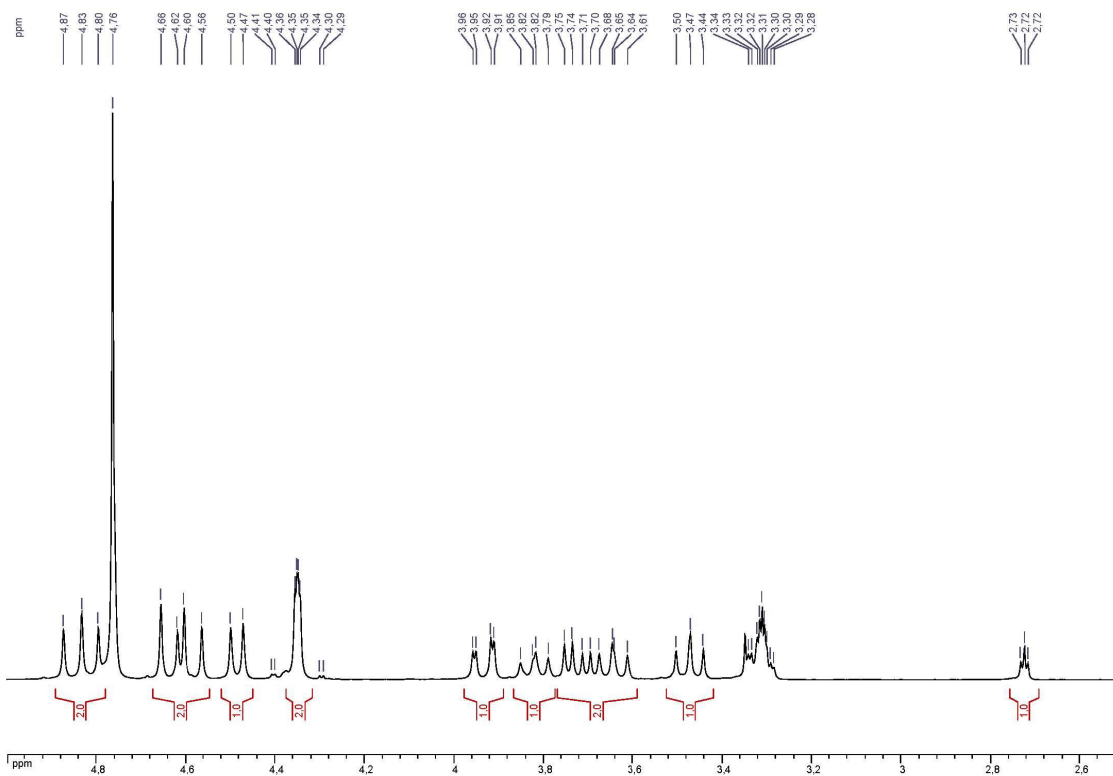

Compound (7) COSY NMR

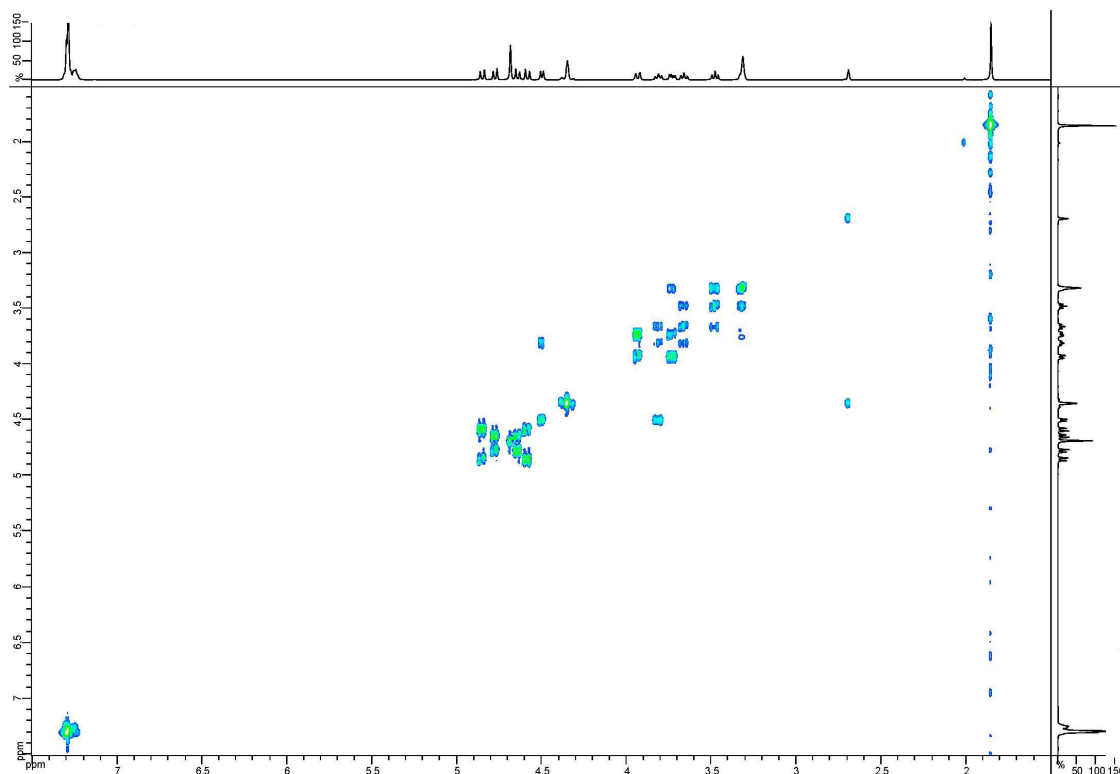

Compound (7) COSY NMR

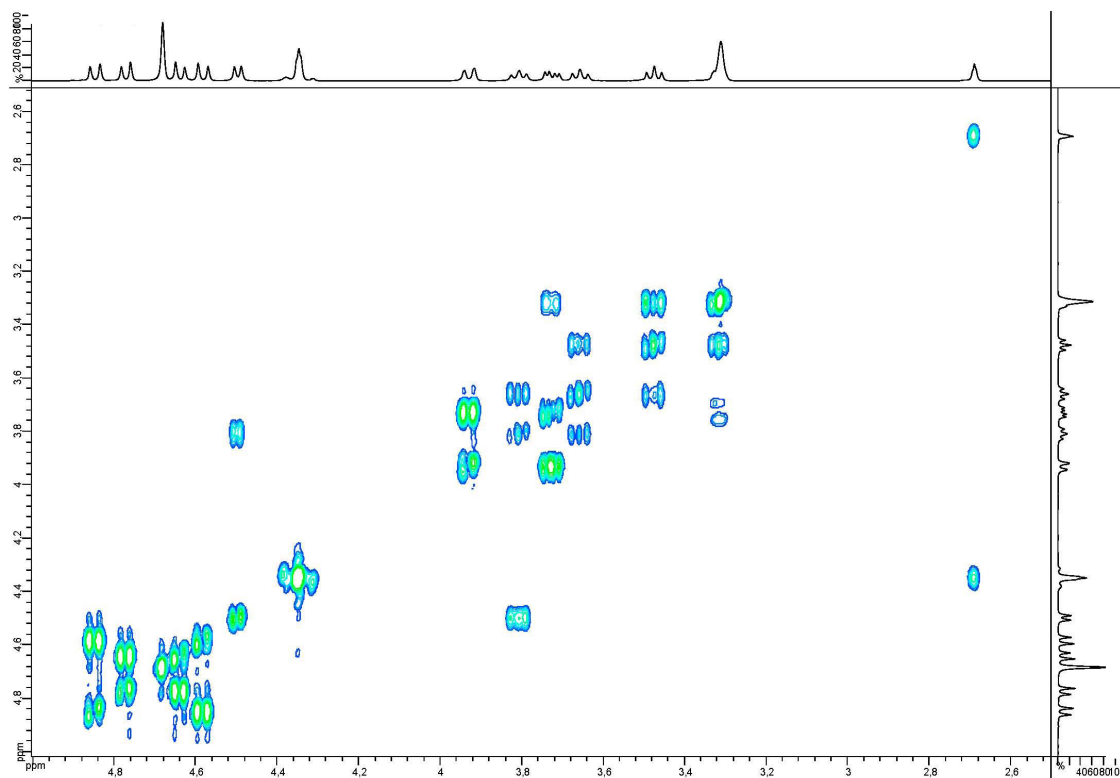

Compound (7)  $^{13}\text{C}$  NMR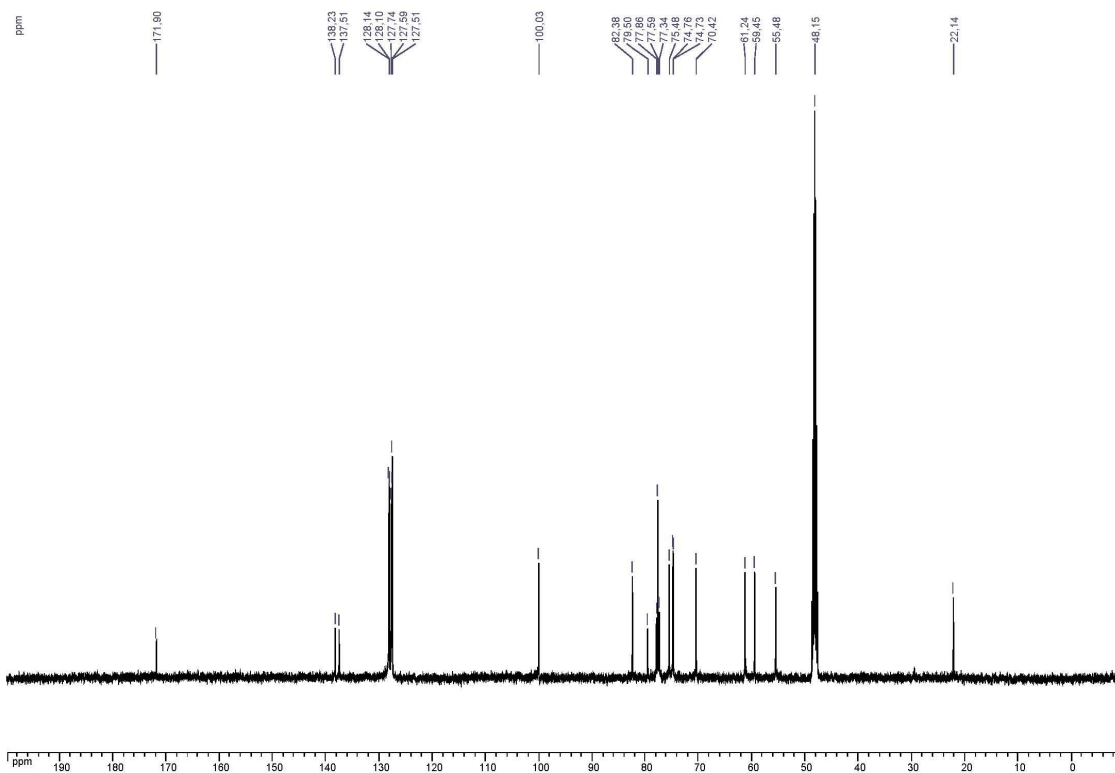

## Compound (7) HSQC NMR

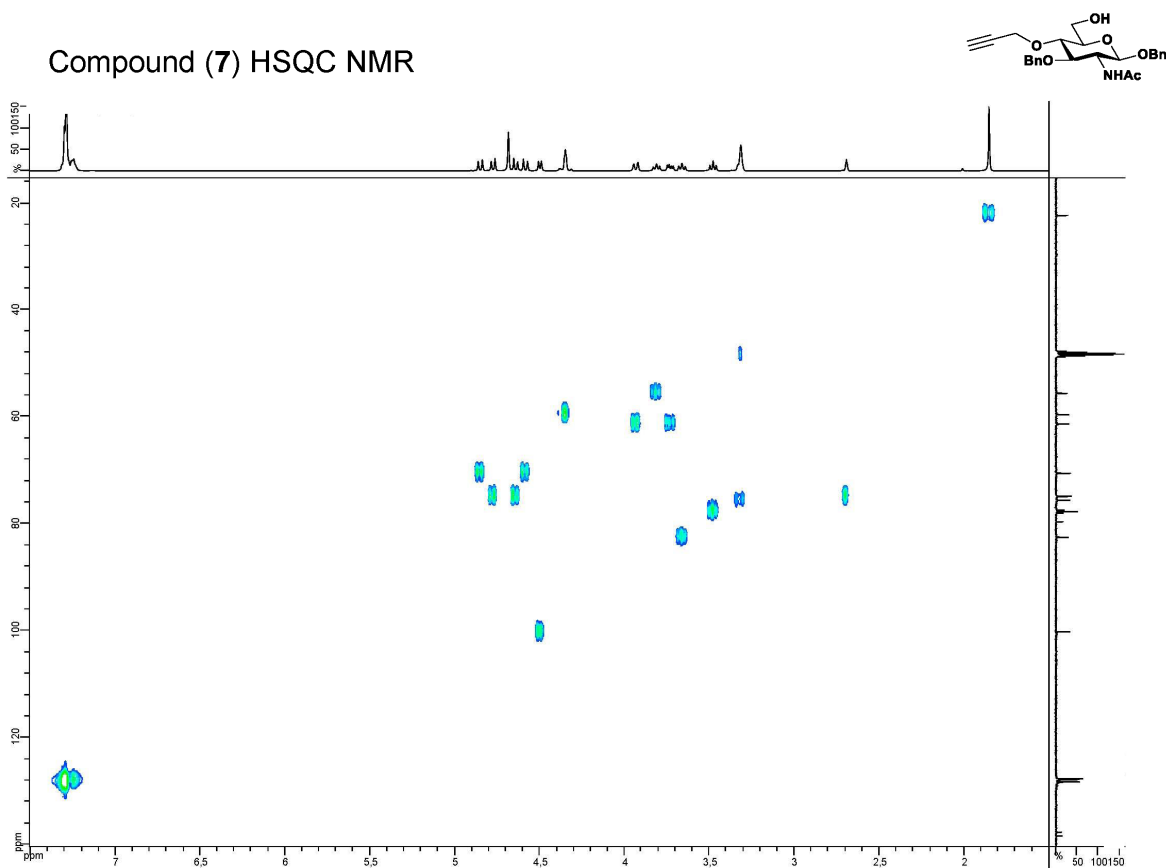

## Compound (7) HMBC NMR

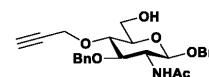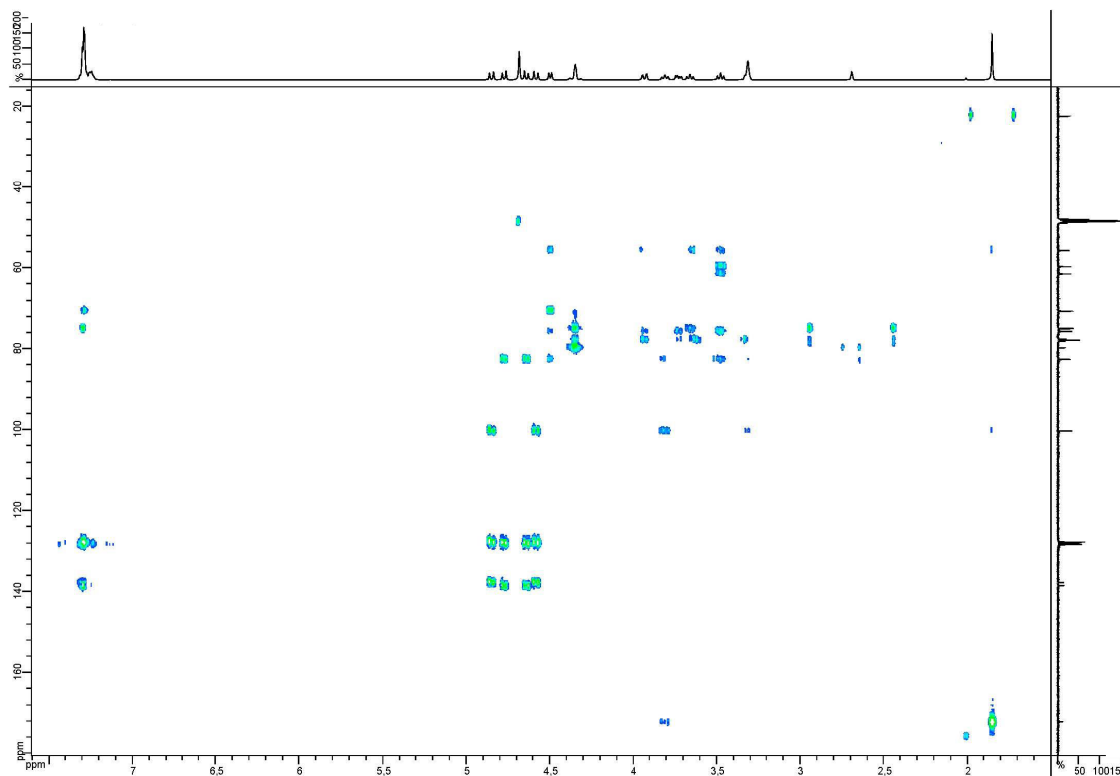

Compound (S1) <sup>1</sup>H NMR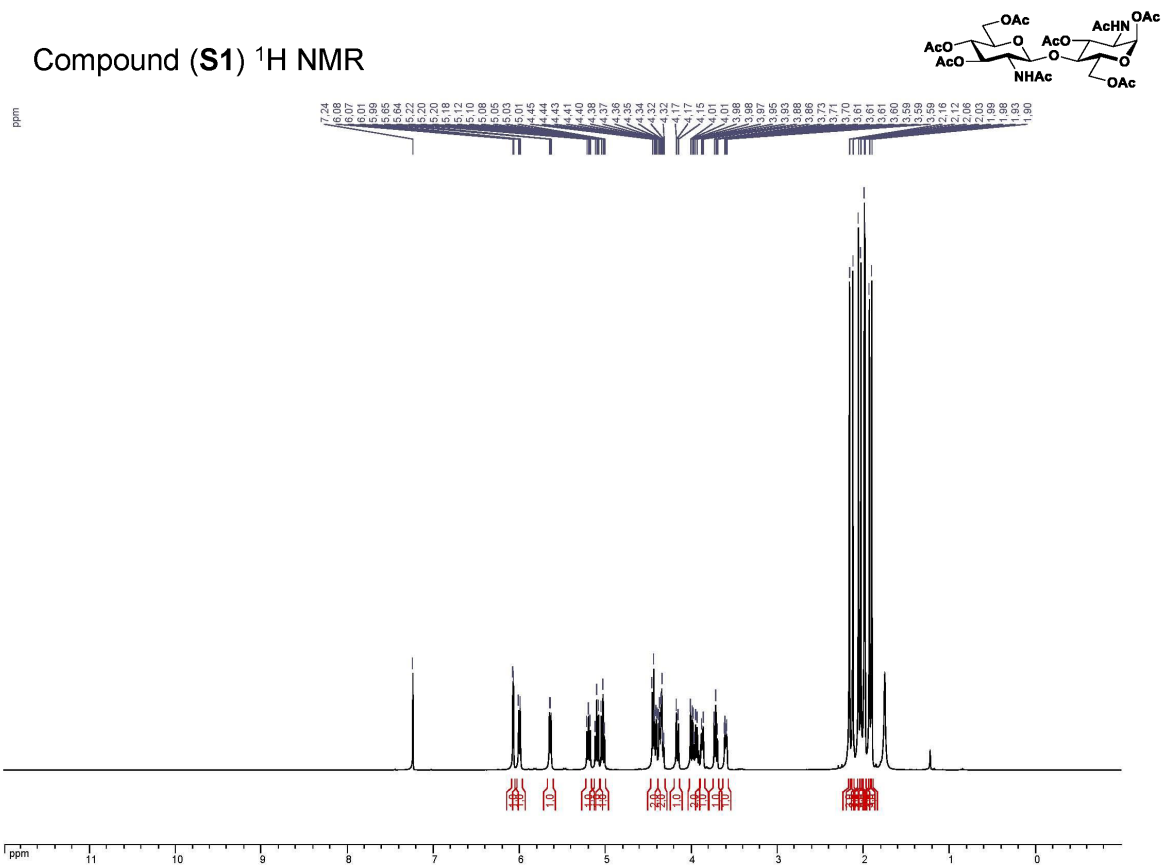Compound (S1) <sup>1</sup>H NMR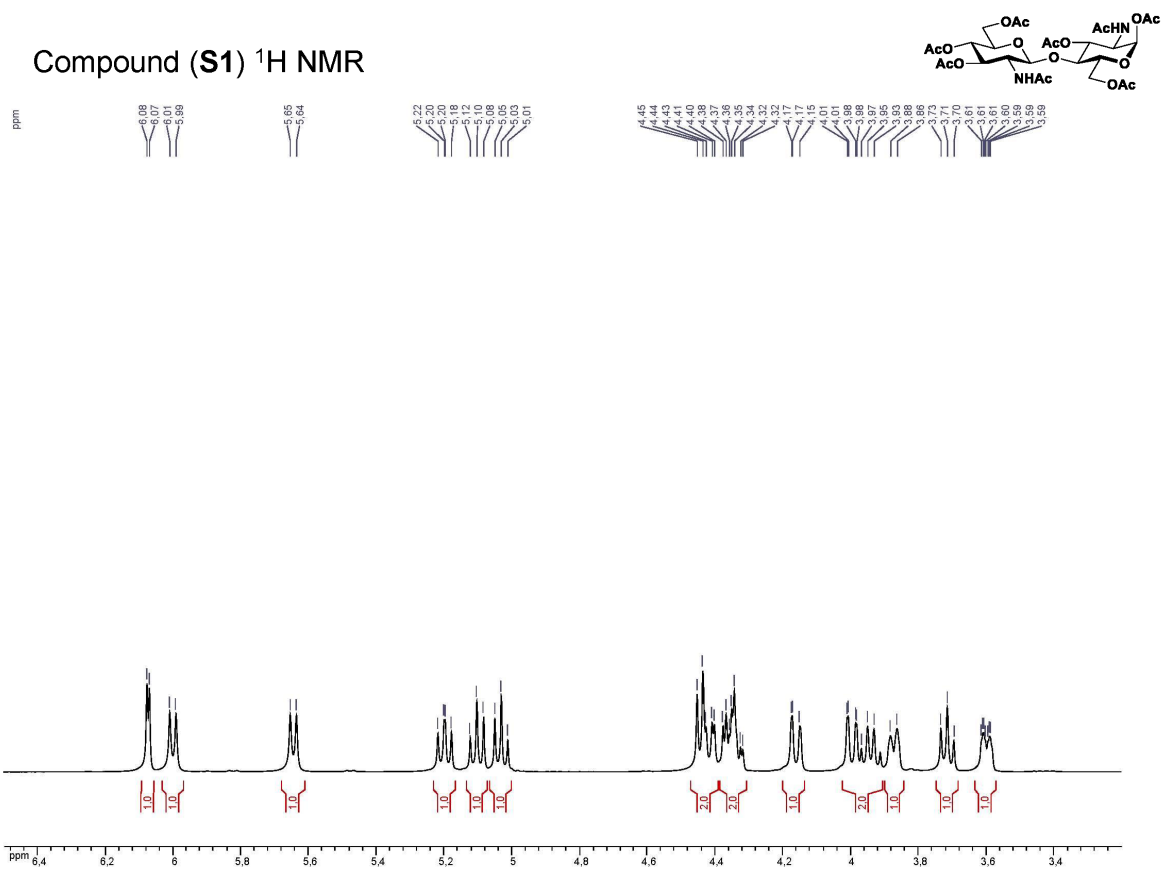

## Compound (S1) COSY NMR

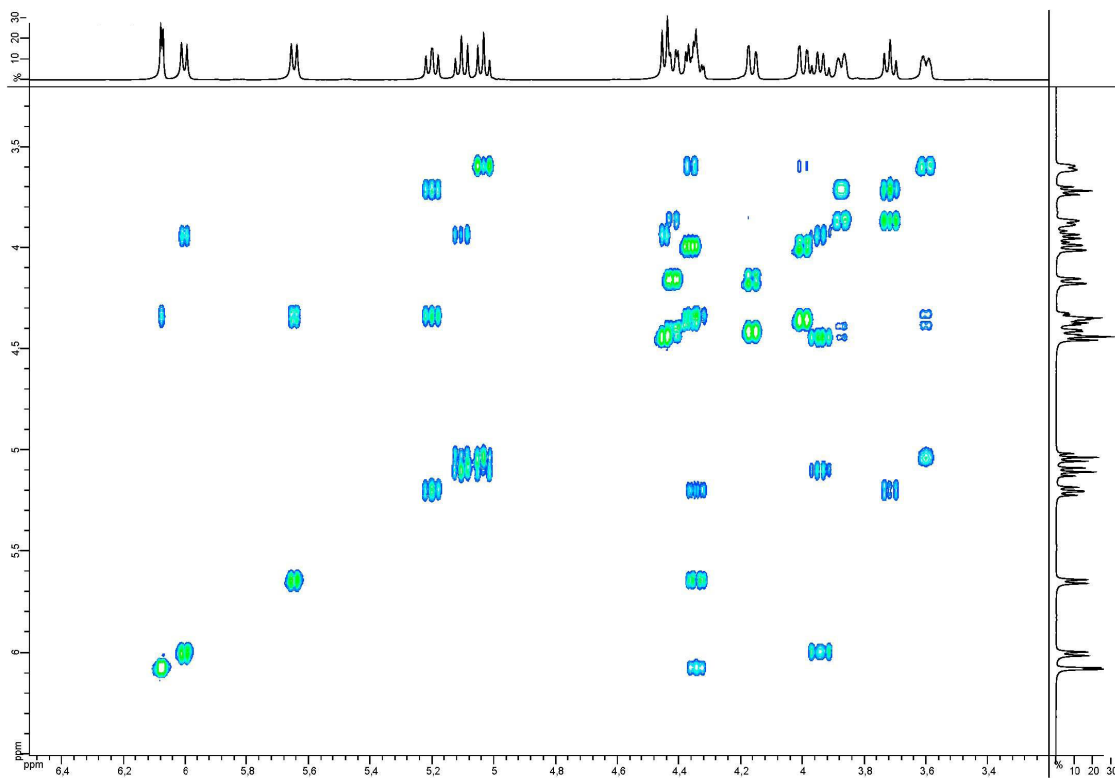Compound (S1) <sup>13</sup>C NMR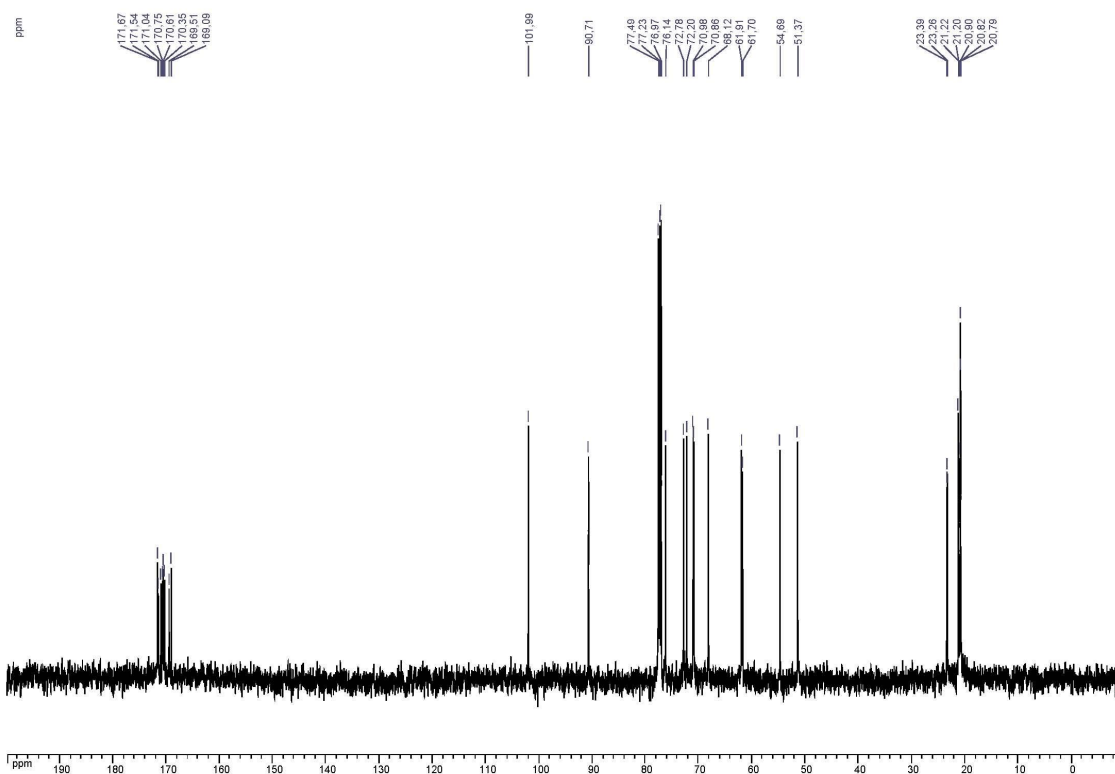



## Compound (S1) HSQC NMR

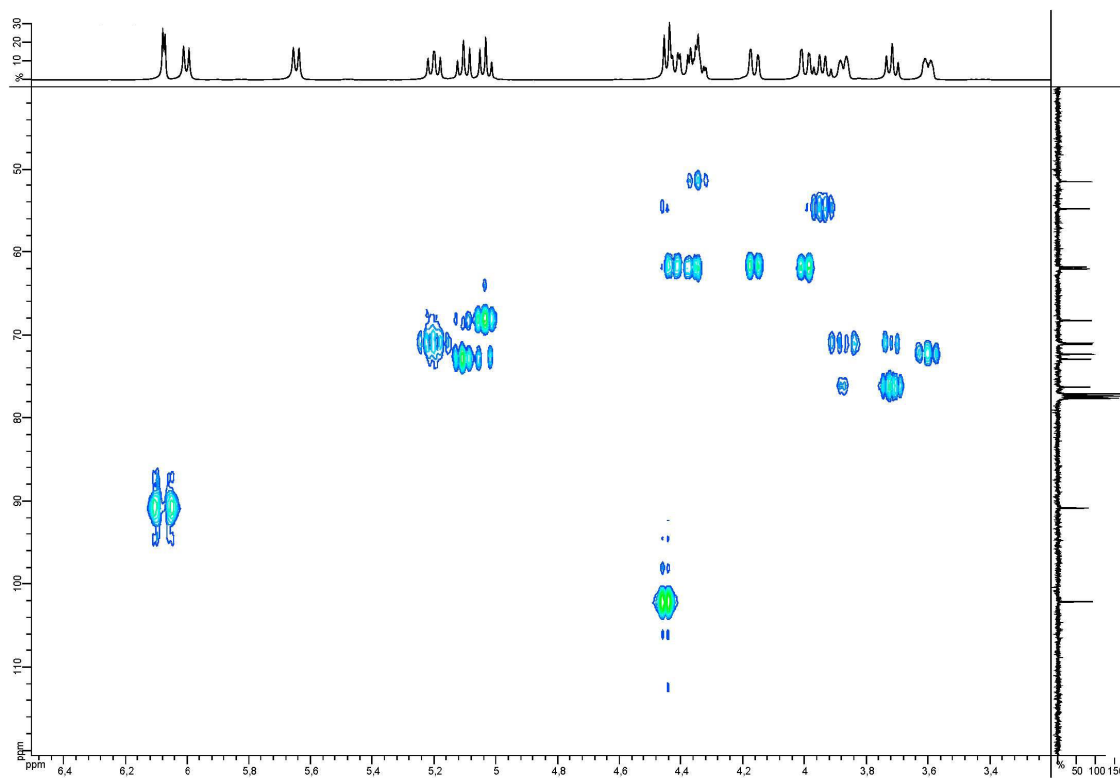

## Compound (S1) HMBC NMR

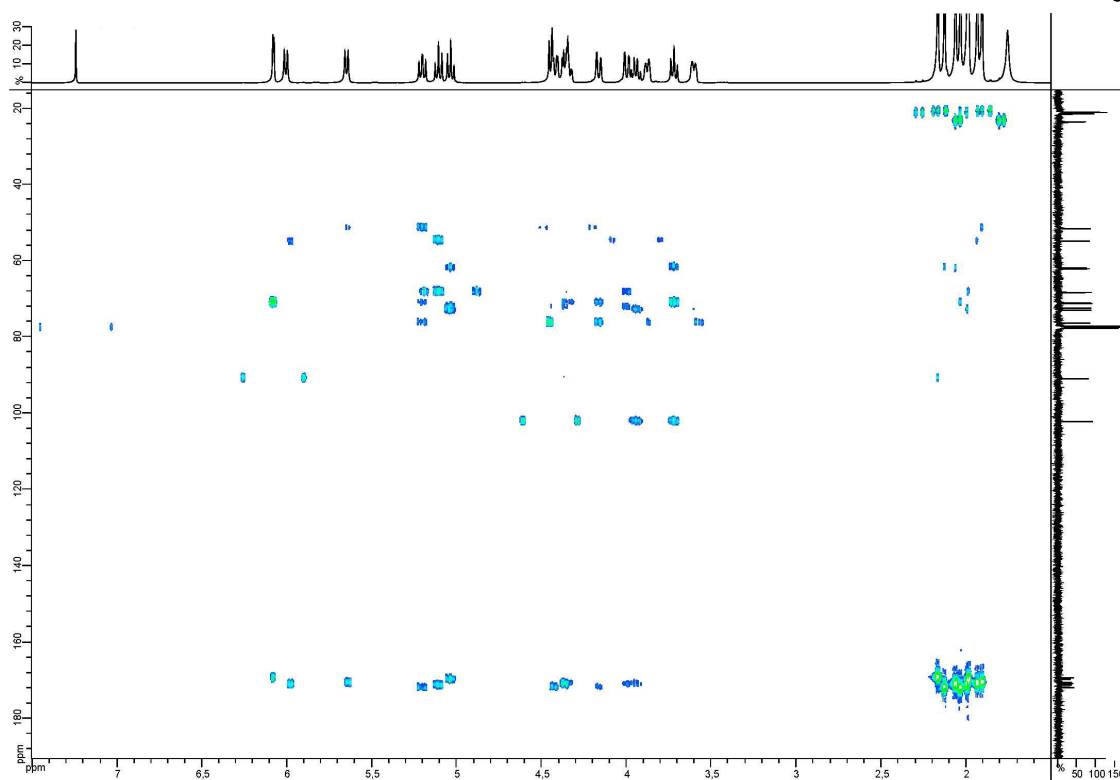





Compound (S2) HSQC NMR

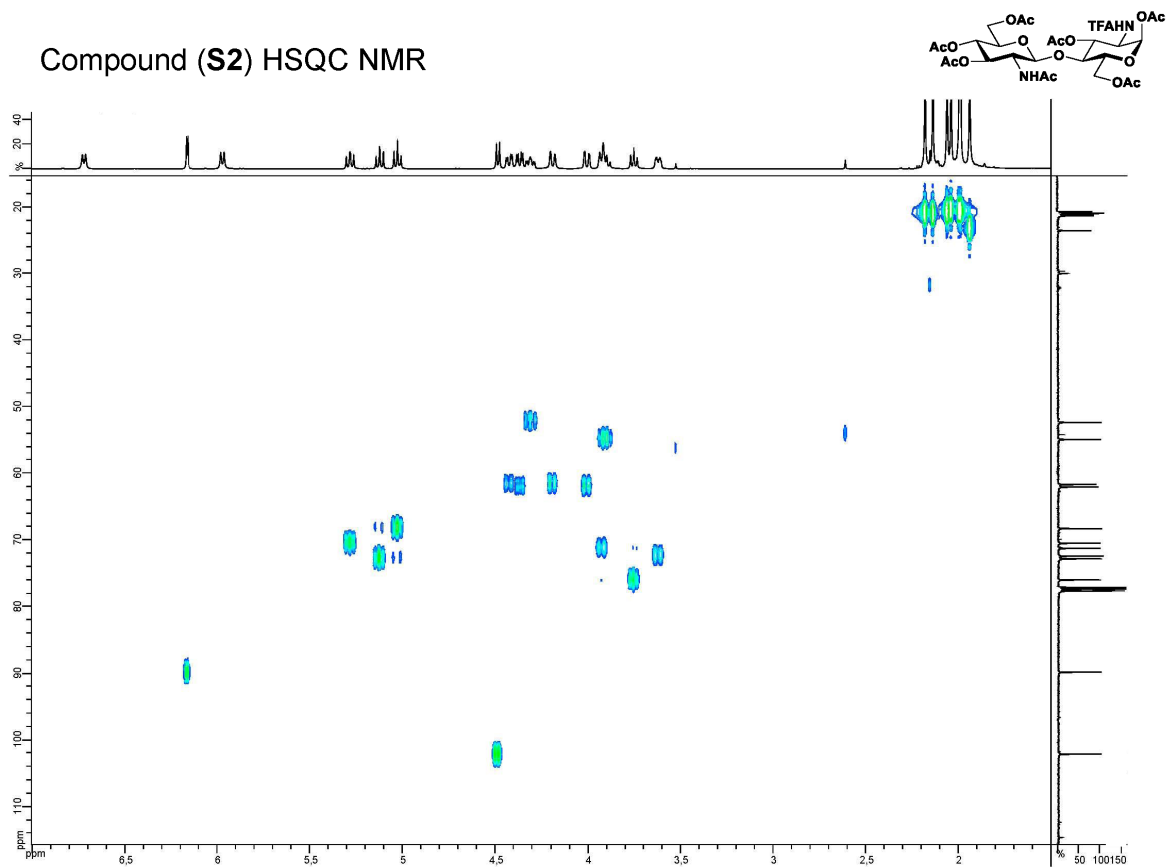

Compound (S2) HMBC NMR

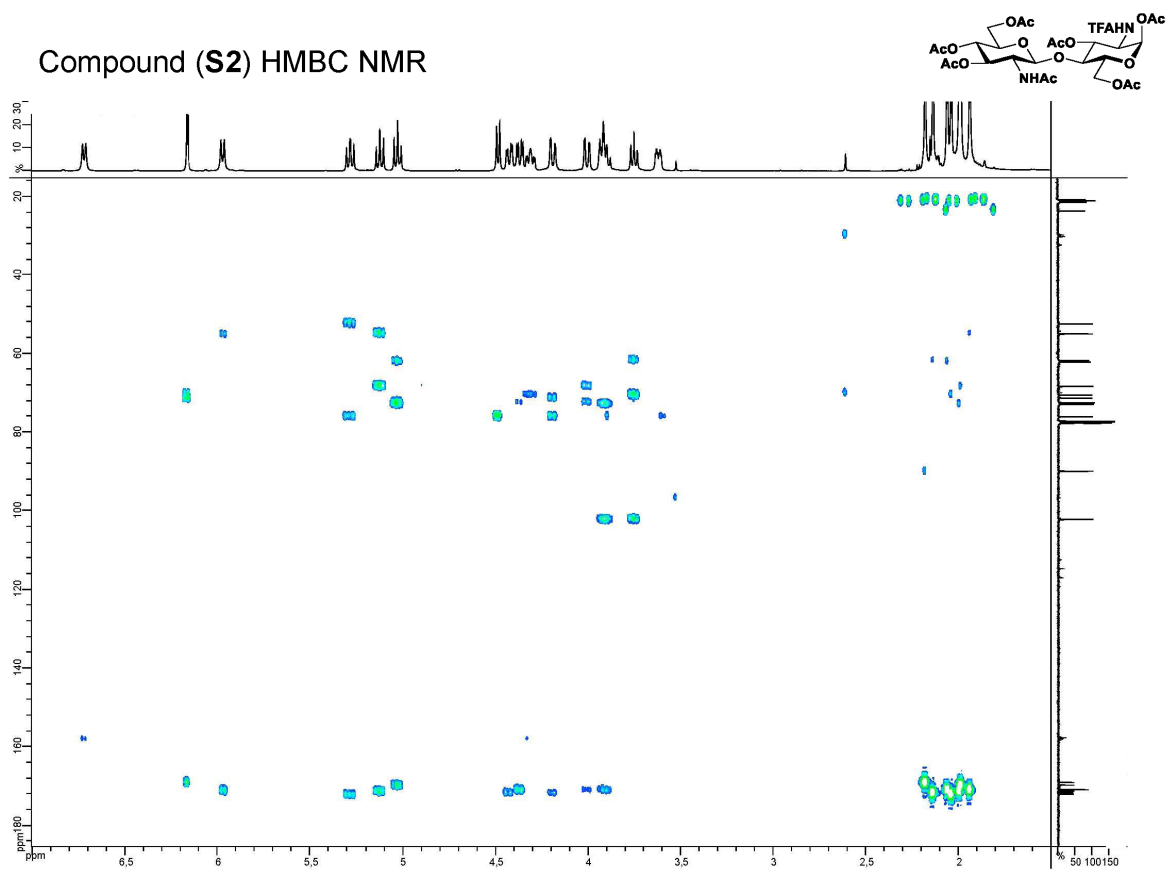



## Compound (S3) COSY NMR

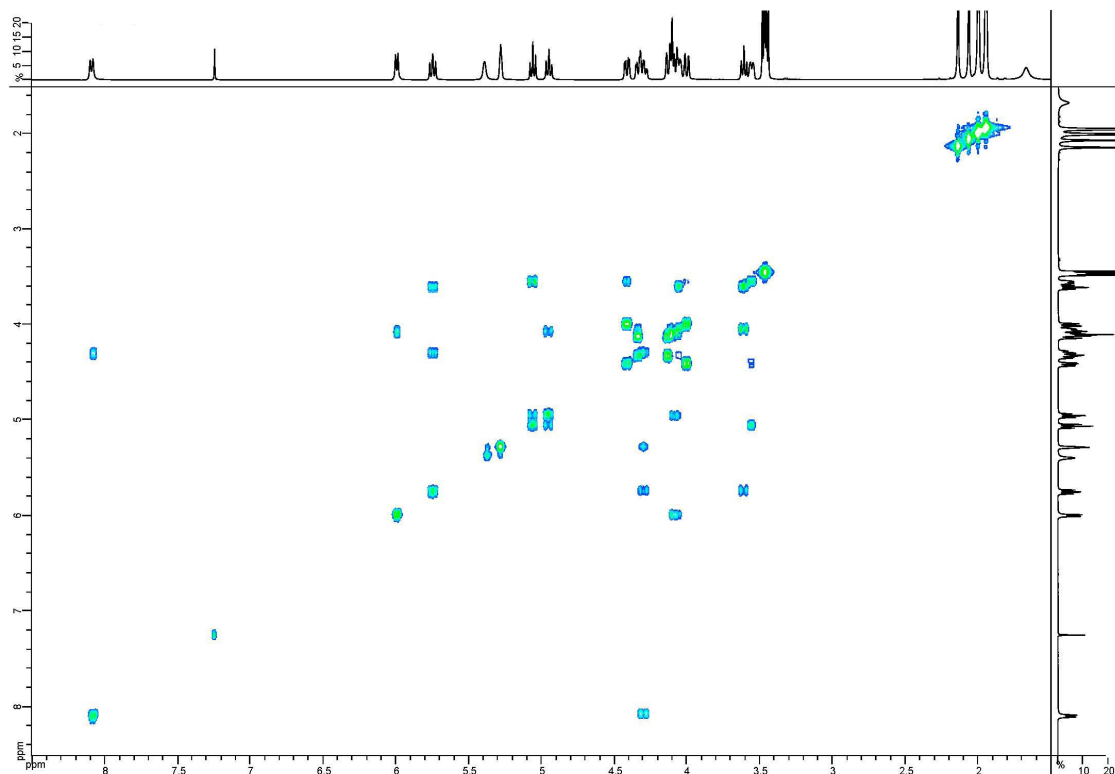Compound (S3)  $^{13}\text{C}$  NMR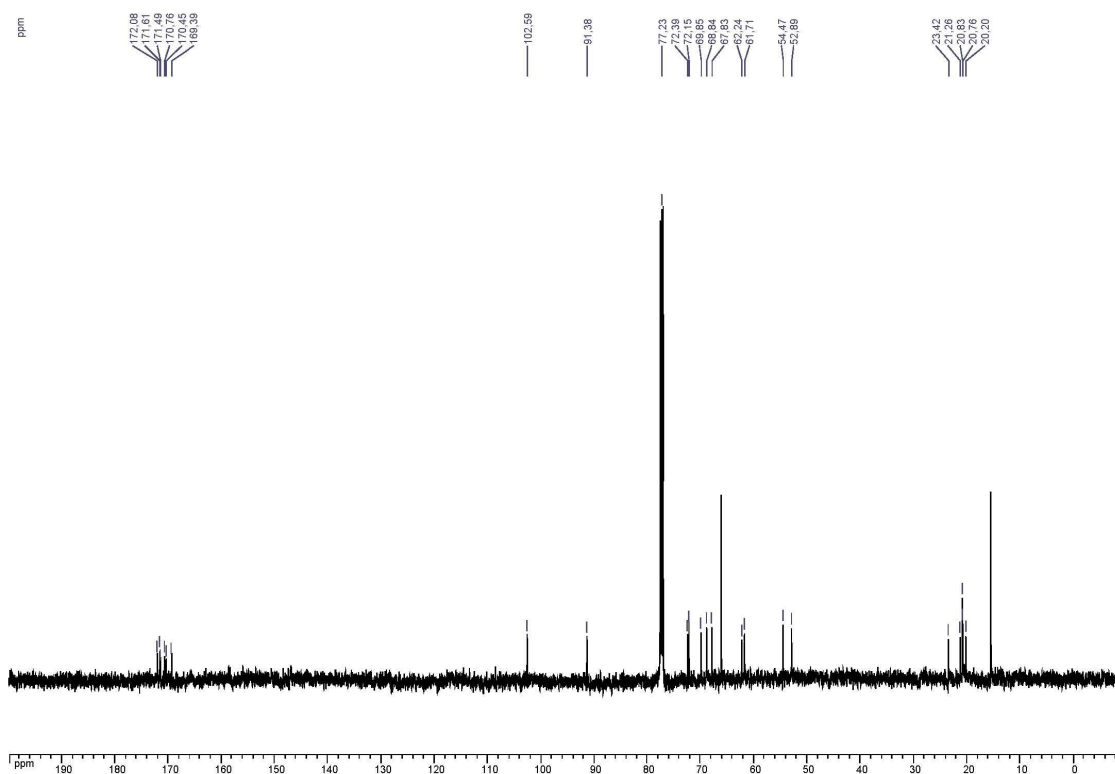

Compound (S3) HSQC NMR

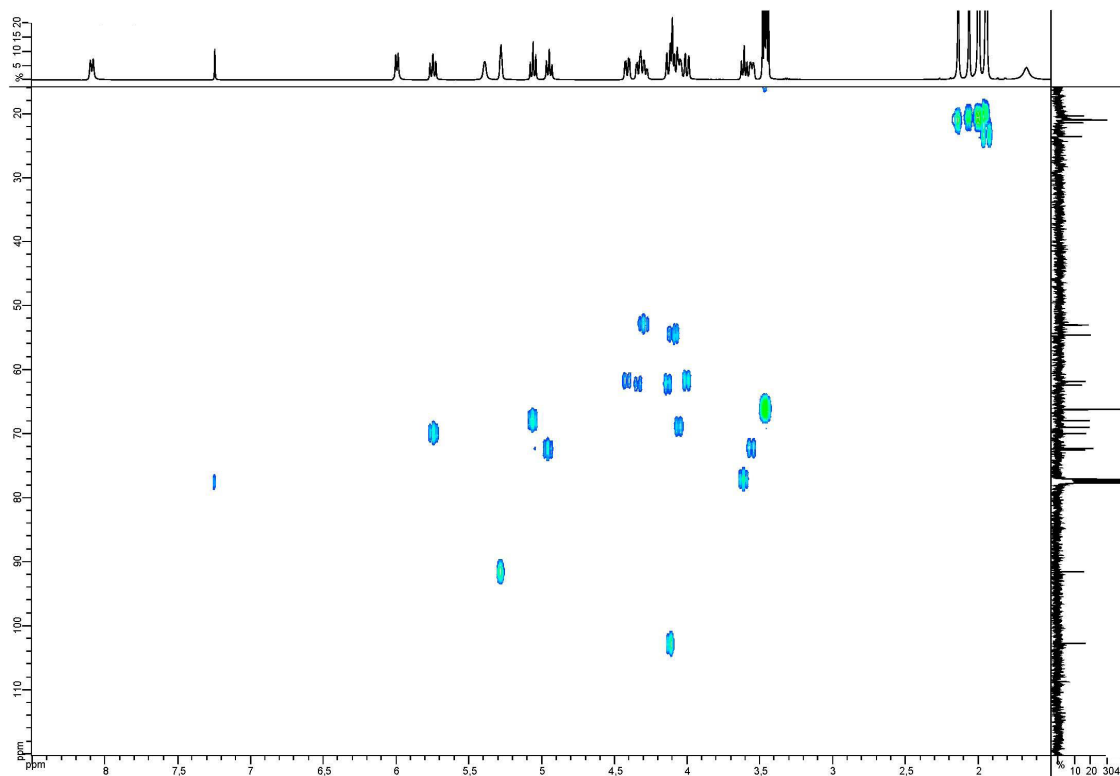

Compound (S3) HMBC NMR

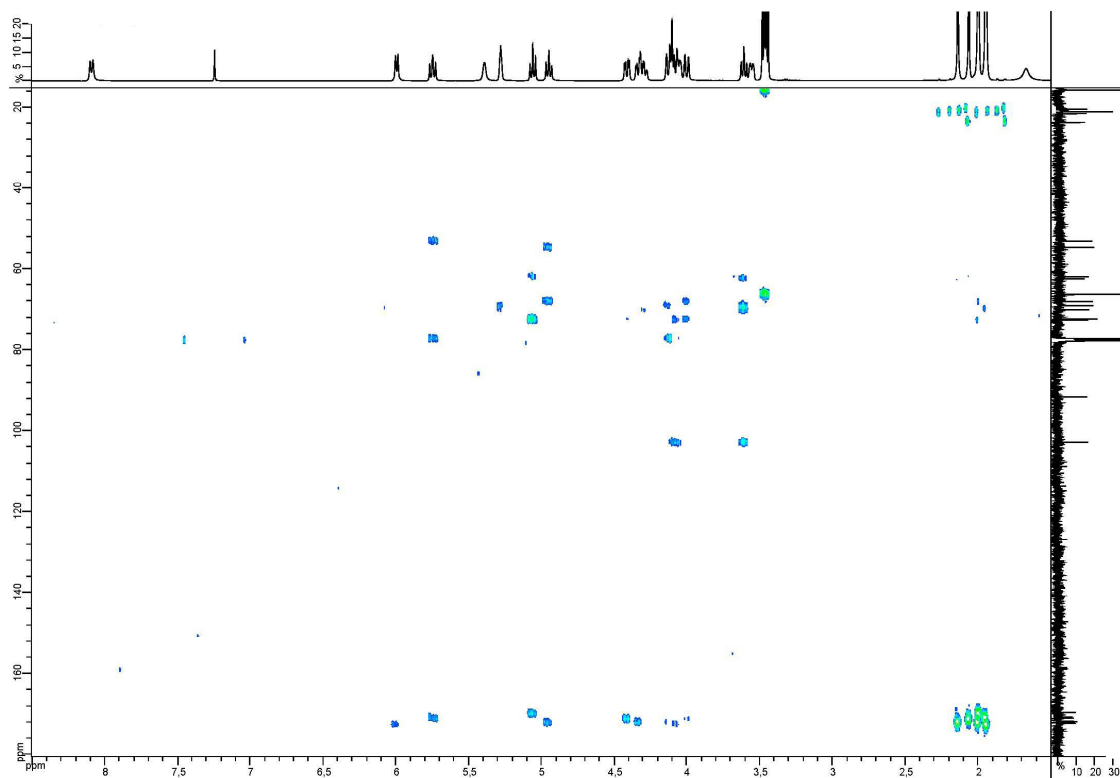





## Compound (16) COSY NMR

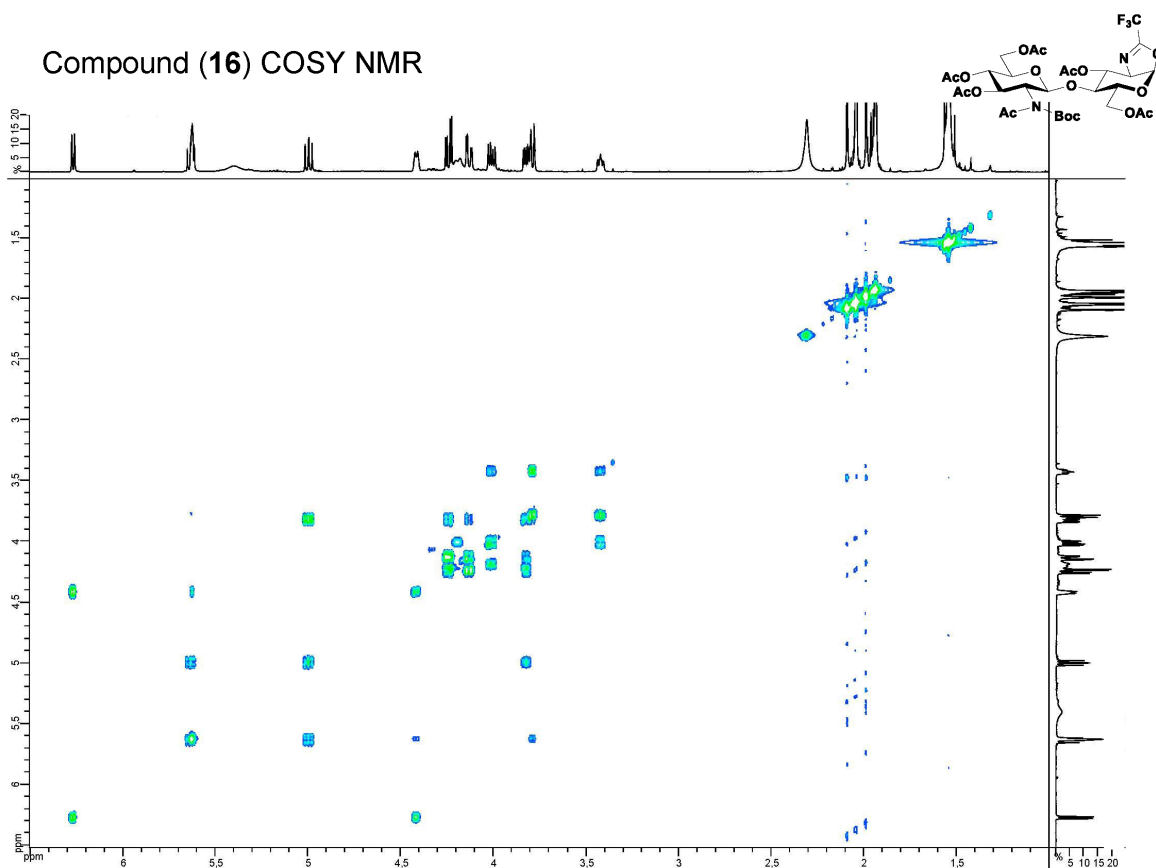Compound (16) <sup>13</sup>C NMR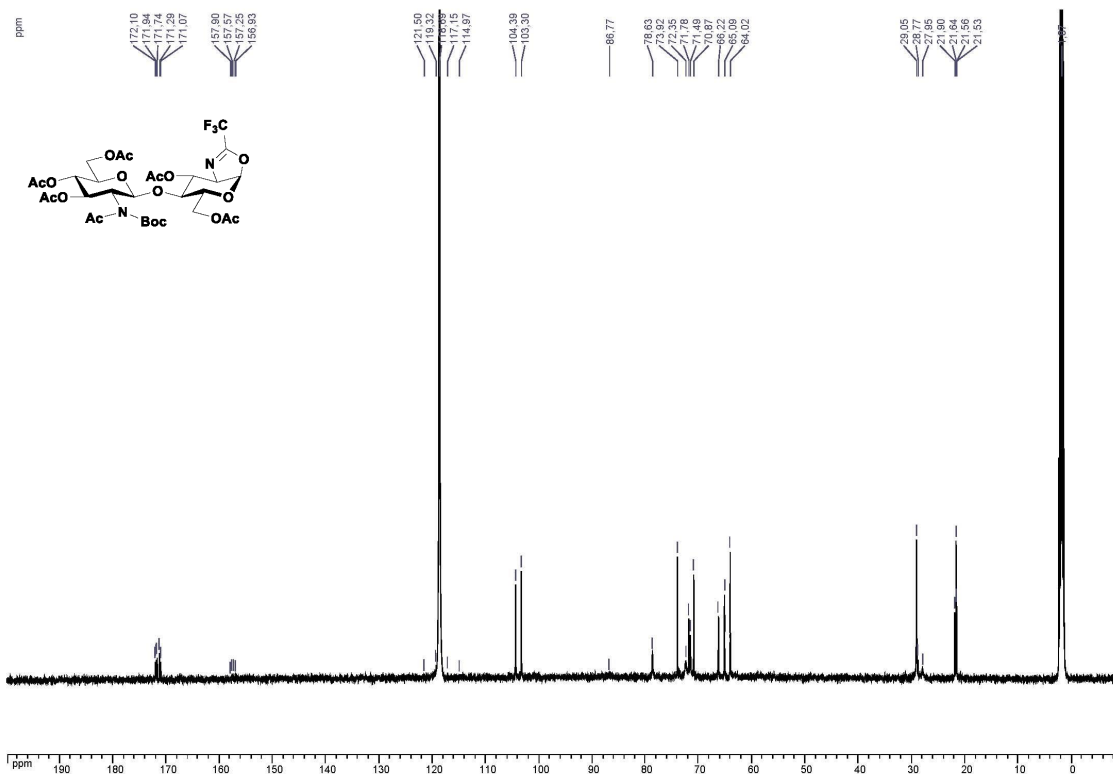

Compound (16) HSQC NMR

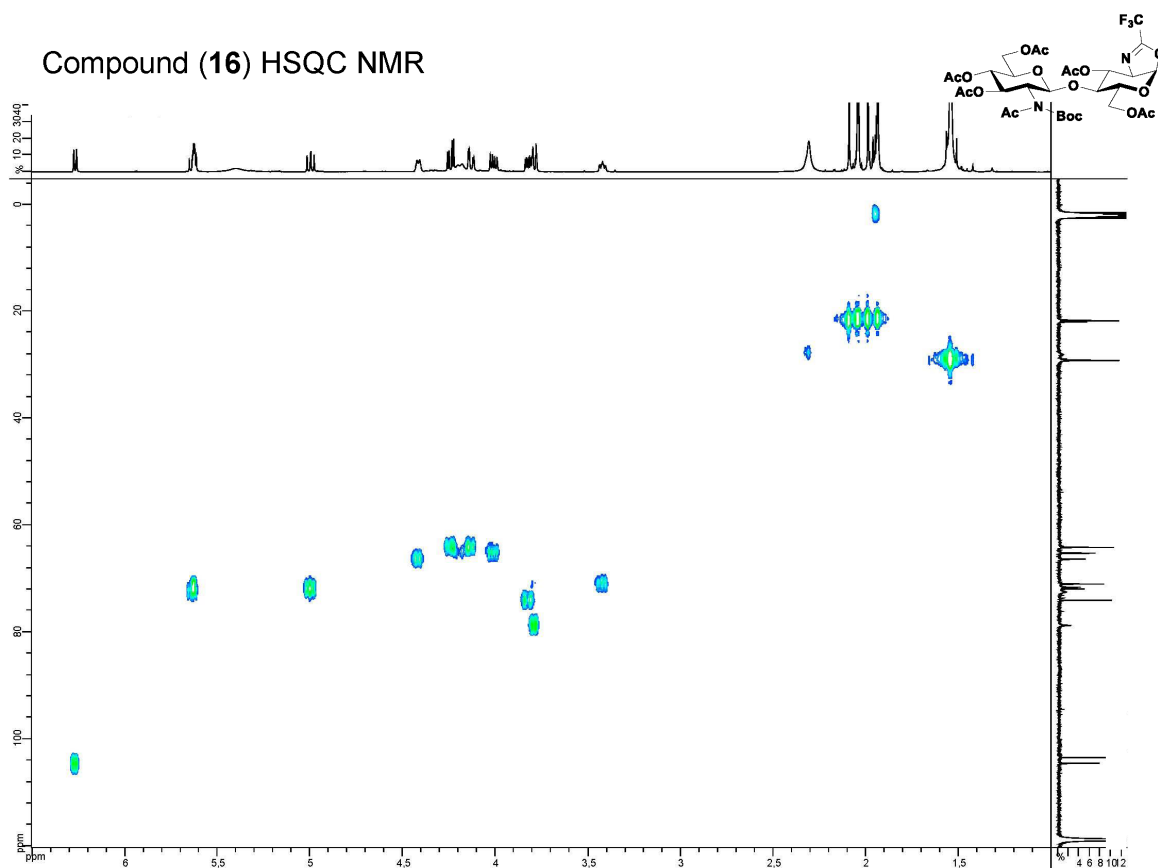

Compound (16) HMBC NMR

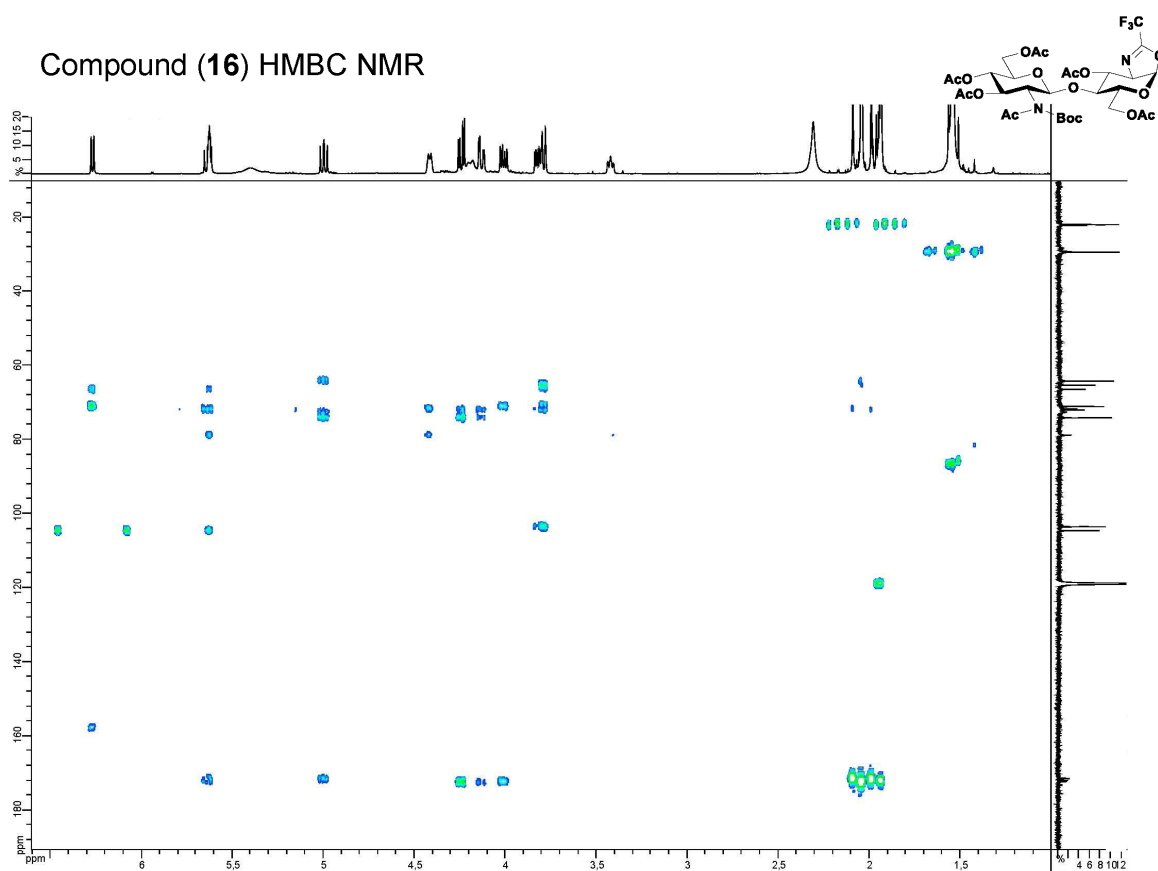

Compound (17)  $^1\text{H}$  NMR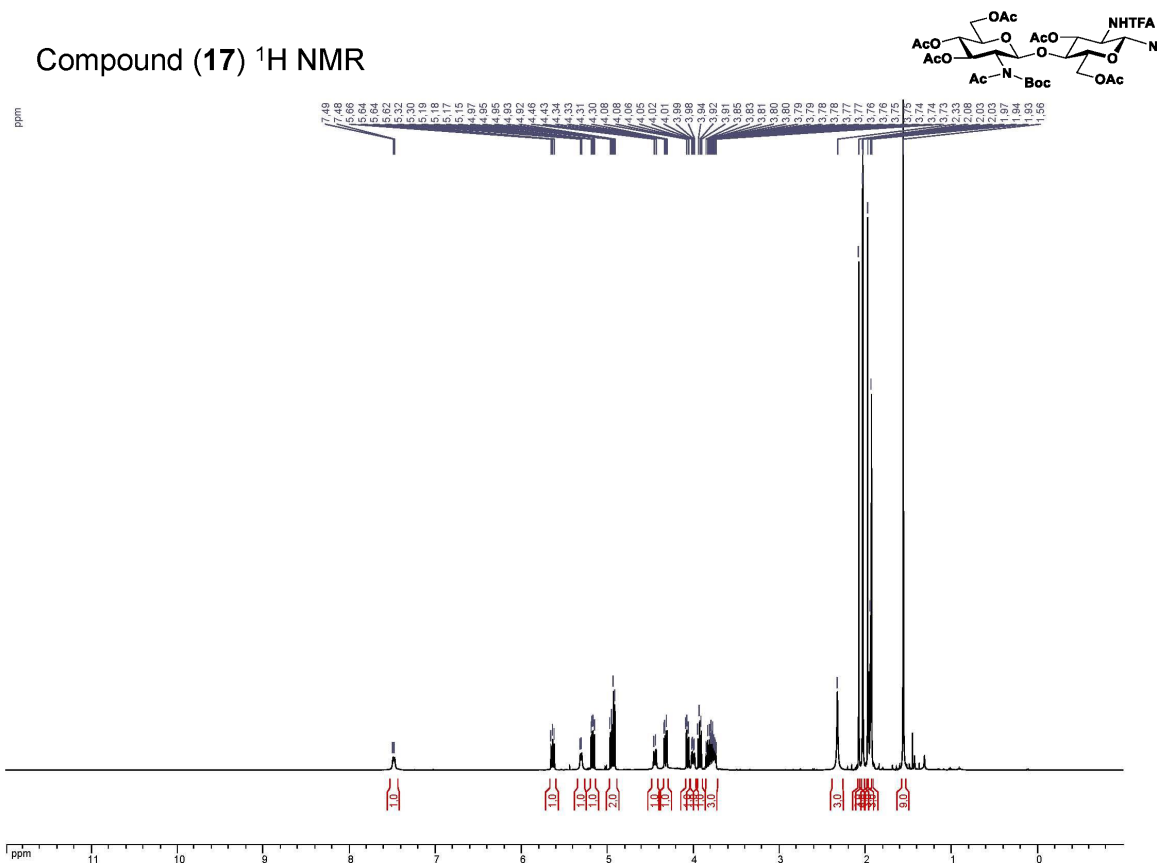Compound (17)  $^1\text{H}$  NMR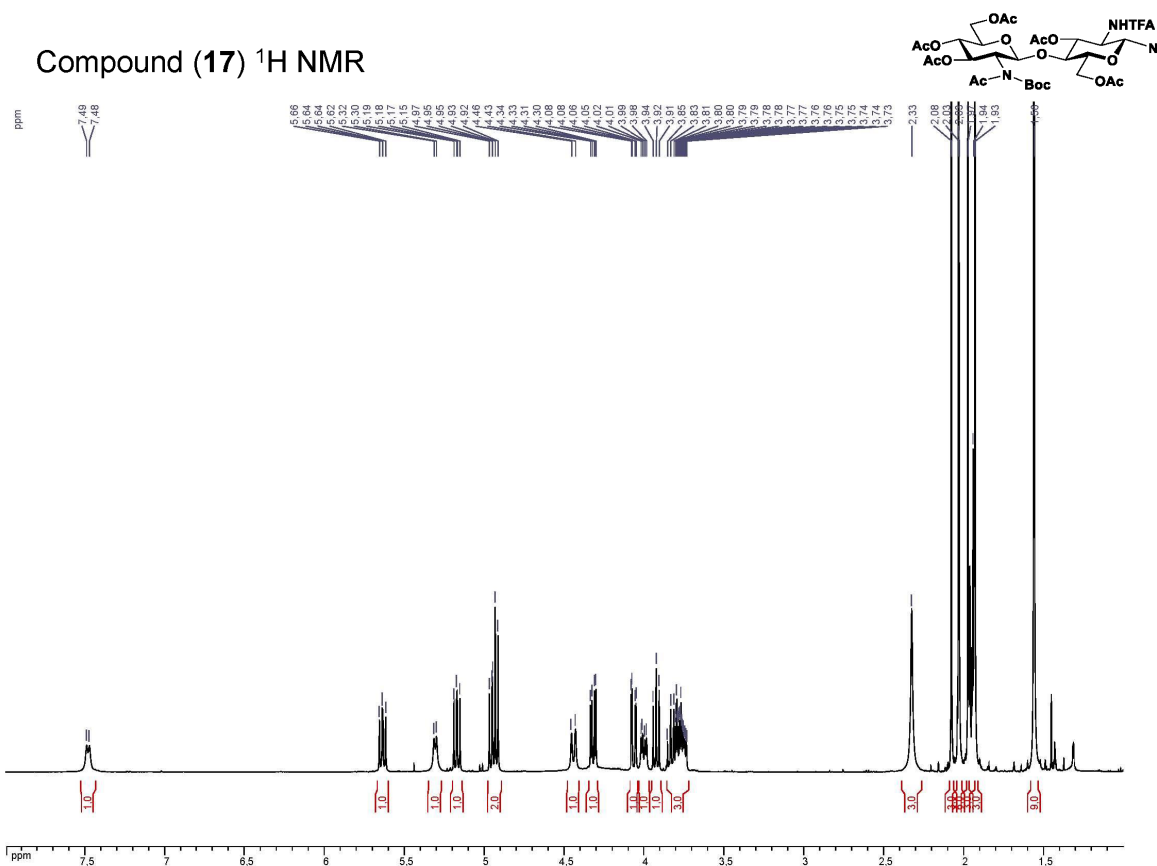

## Compound (17) COSY NMR

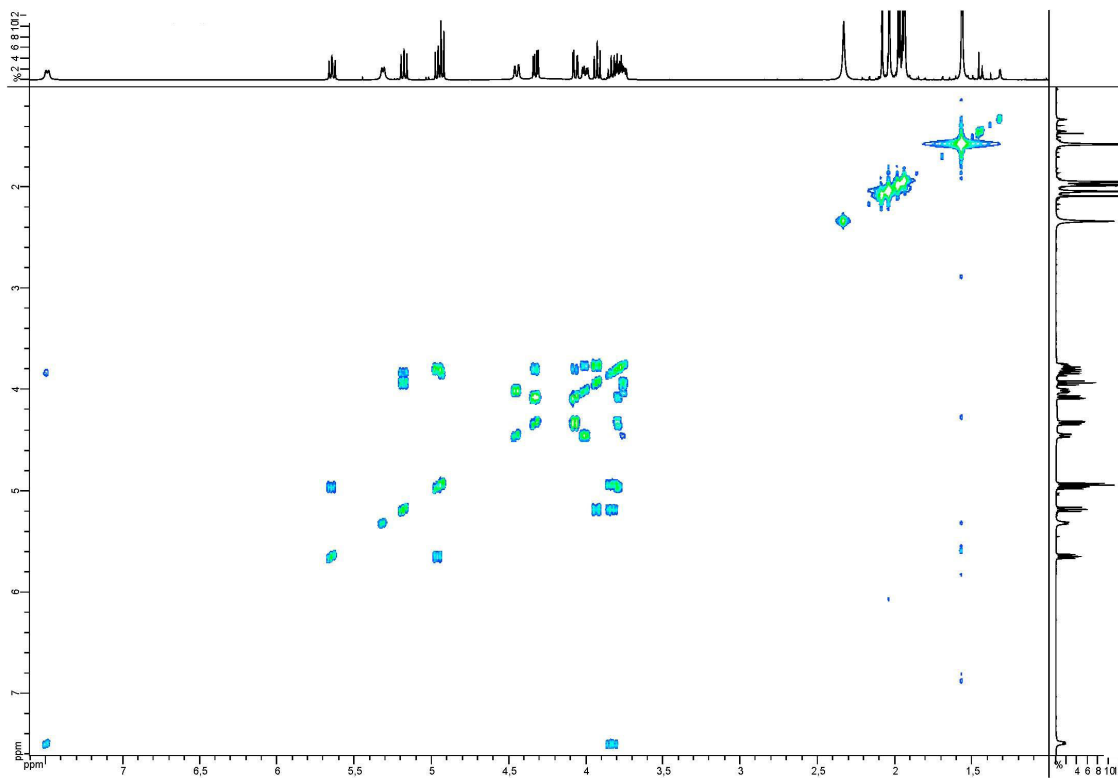Compound (17) <sup>13</sup>C NMR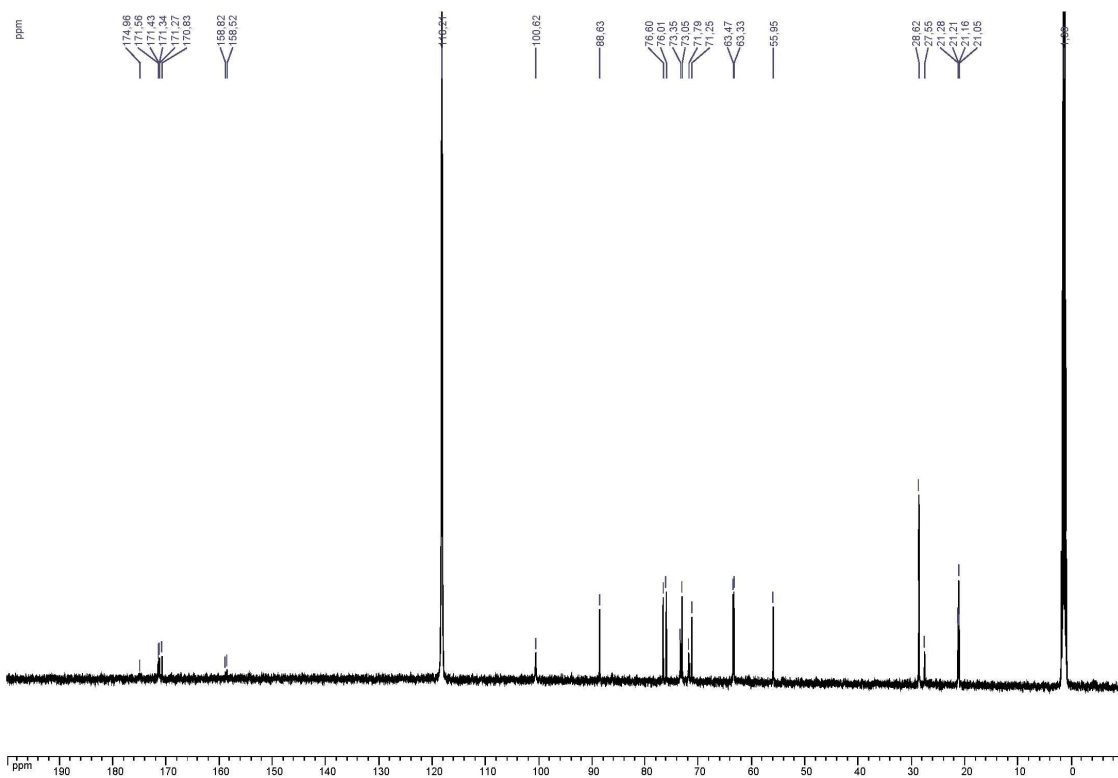

Compound (17) HSQC NMR

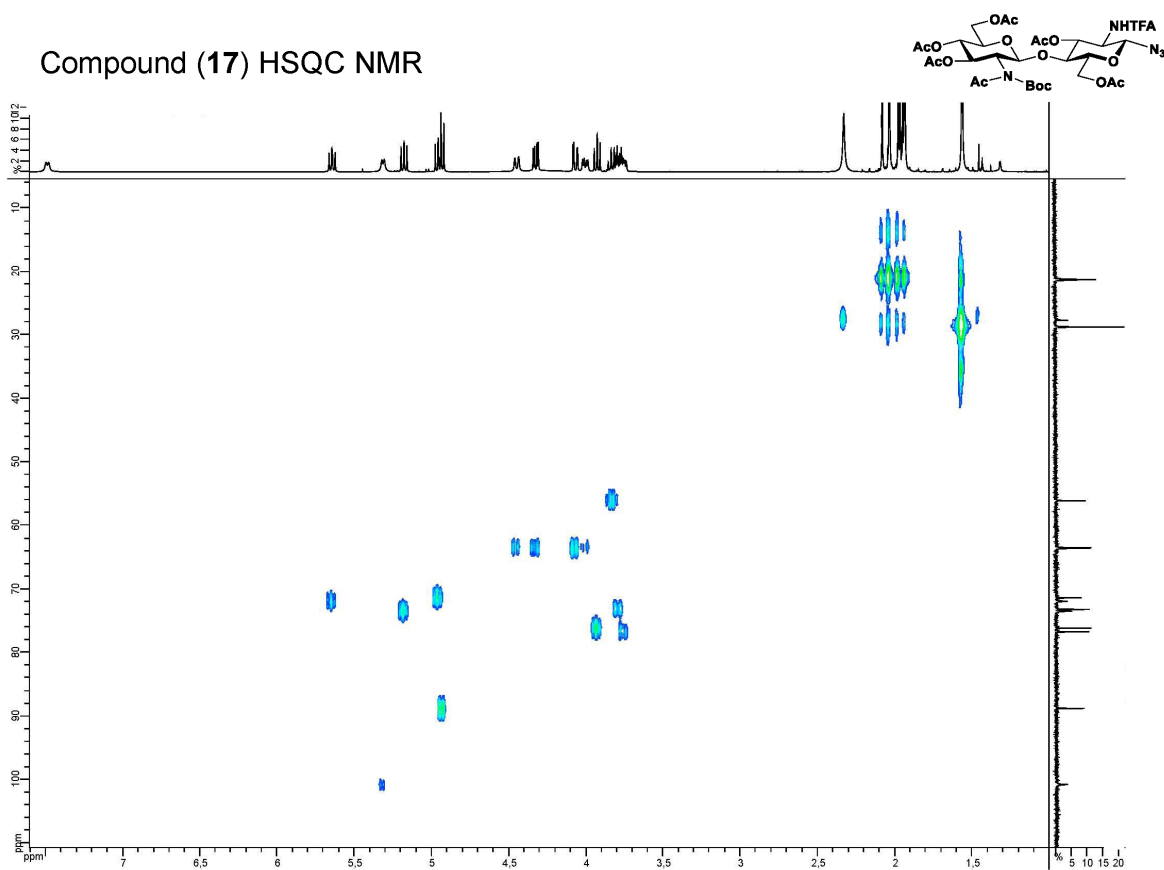

Compound (17) HMBC NMR

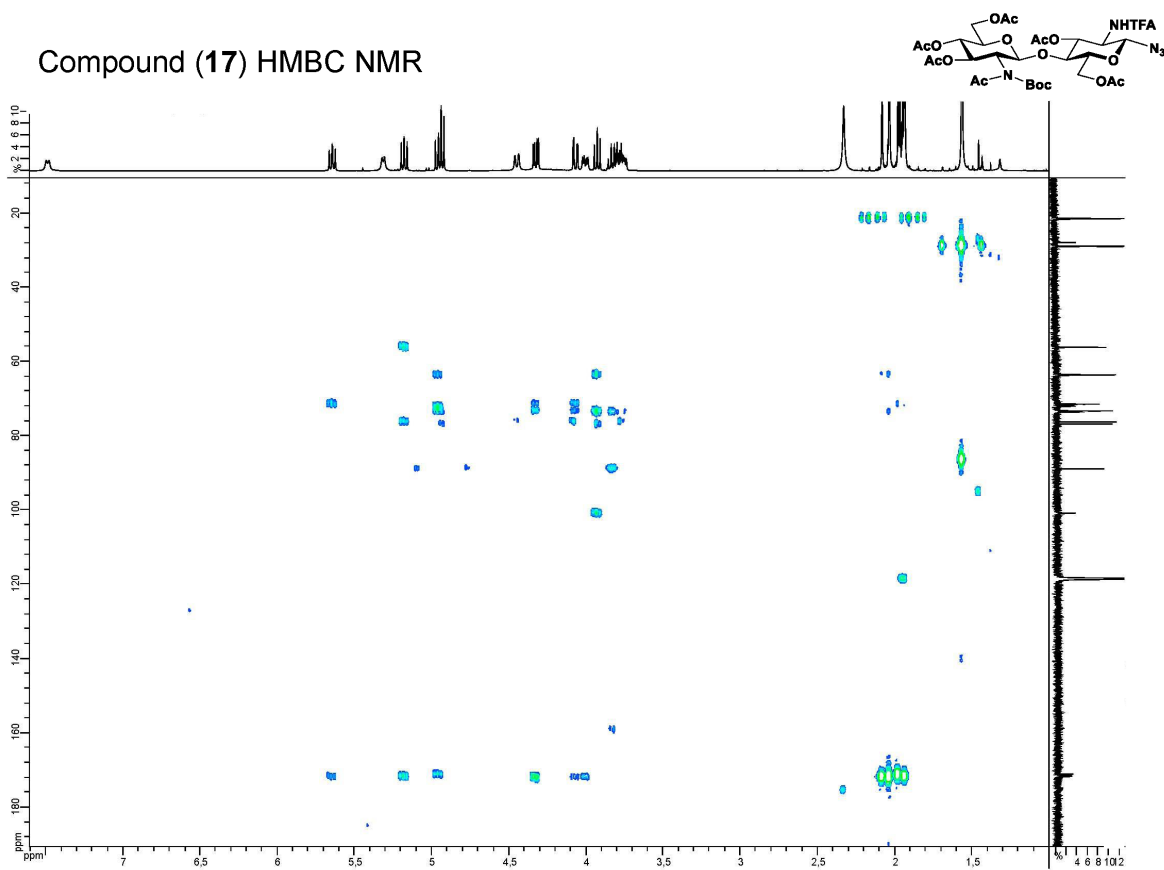



Compound (6) COSY NMR

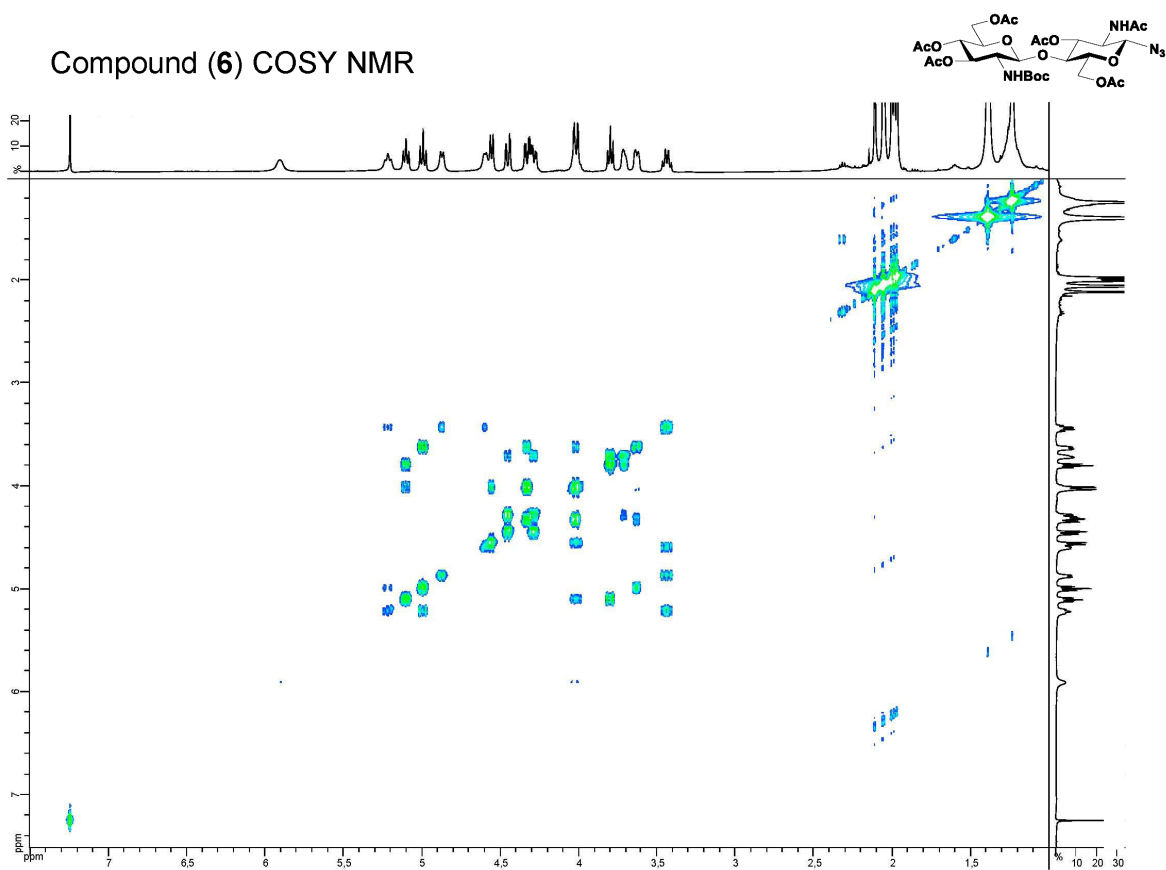

Compound (6) COSY NMR

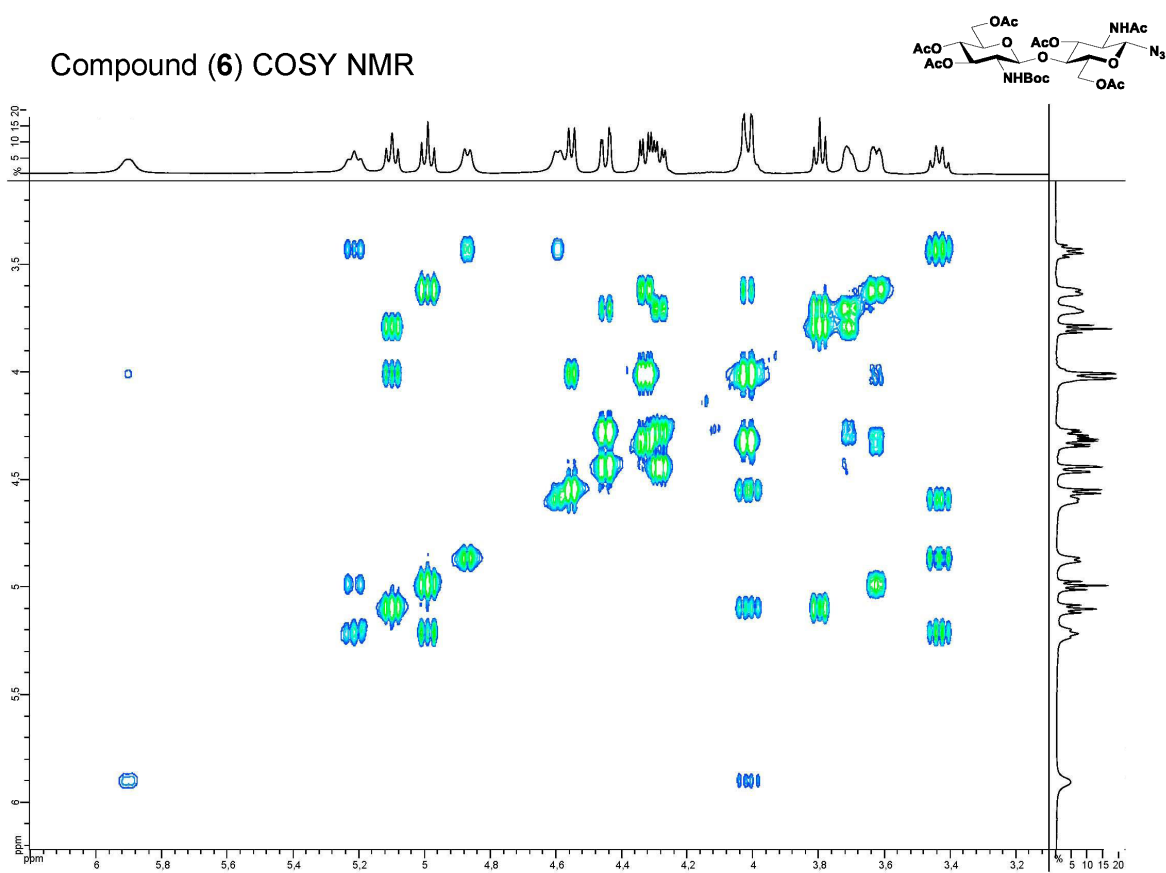

Compound (6)  $^{13}\text{C}$  NMR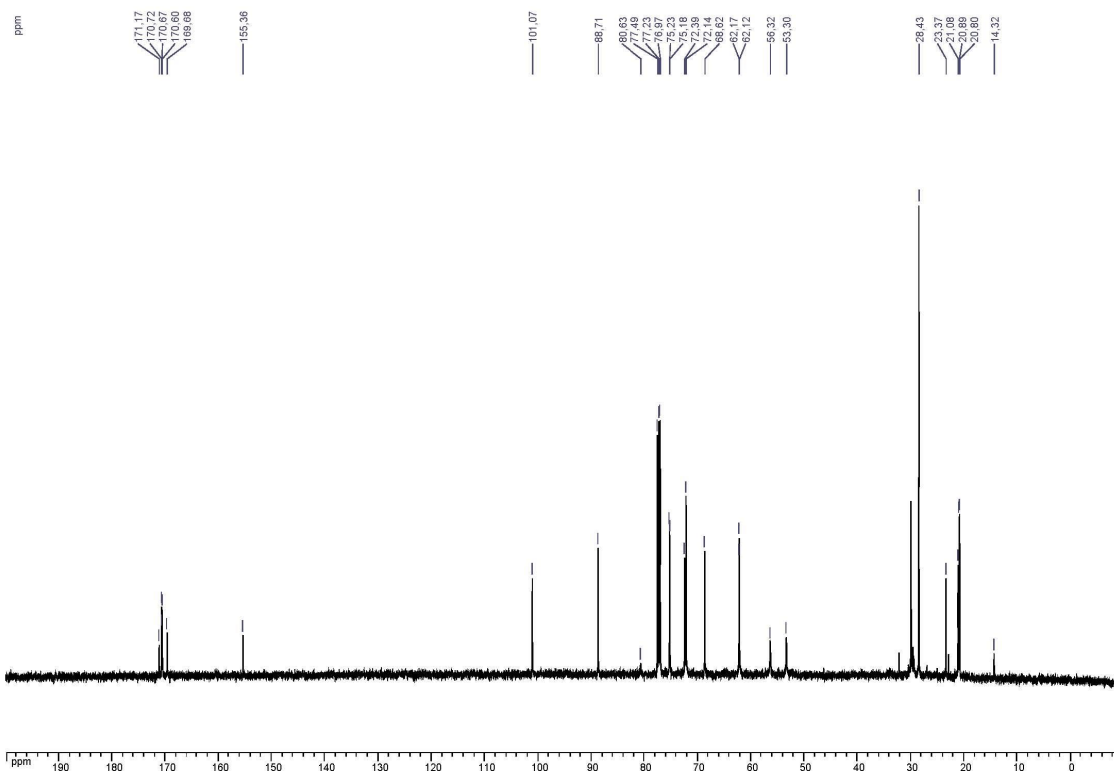

## Compound (6) HSQC NMR

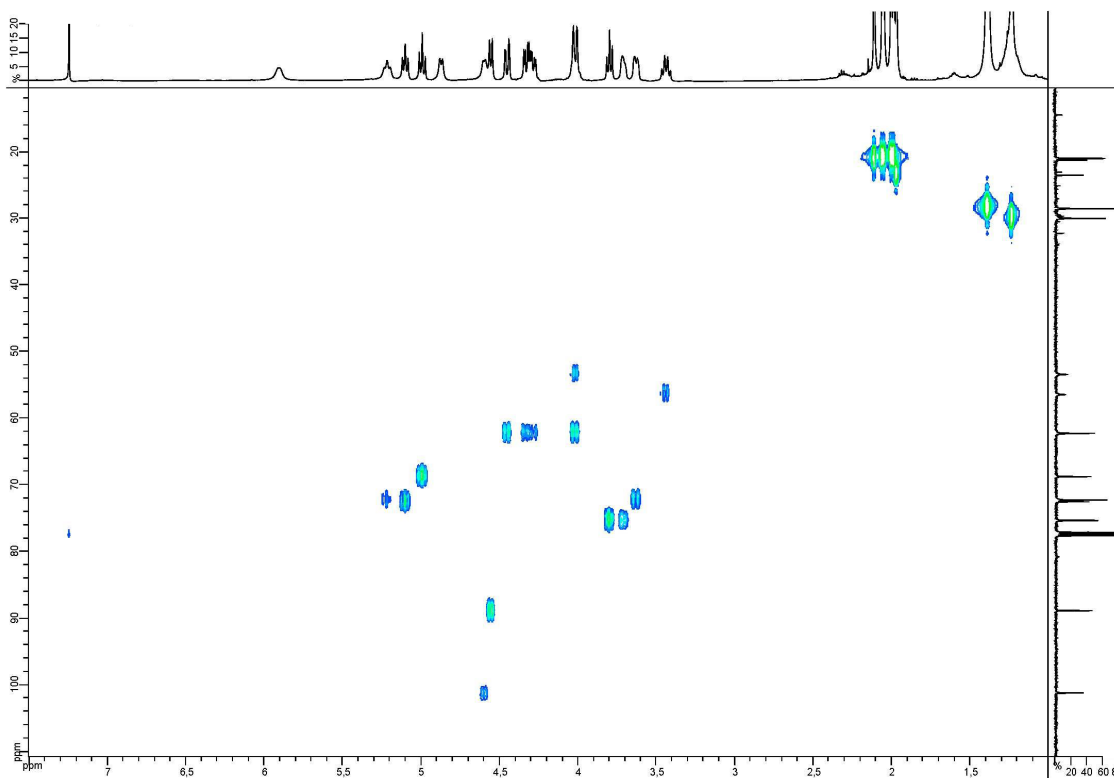



Compound (6) HMBC NMR

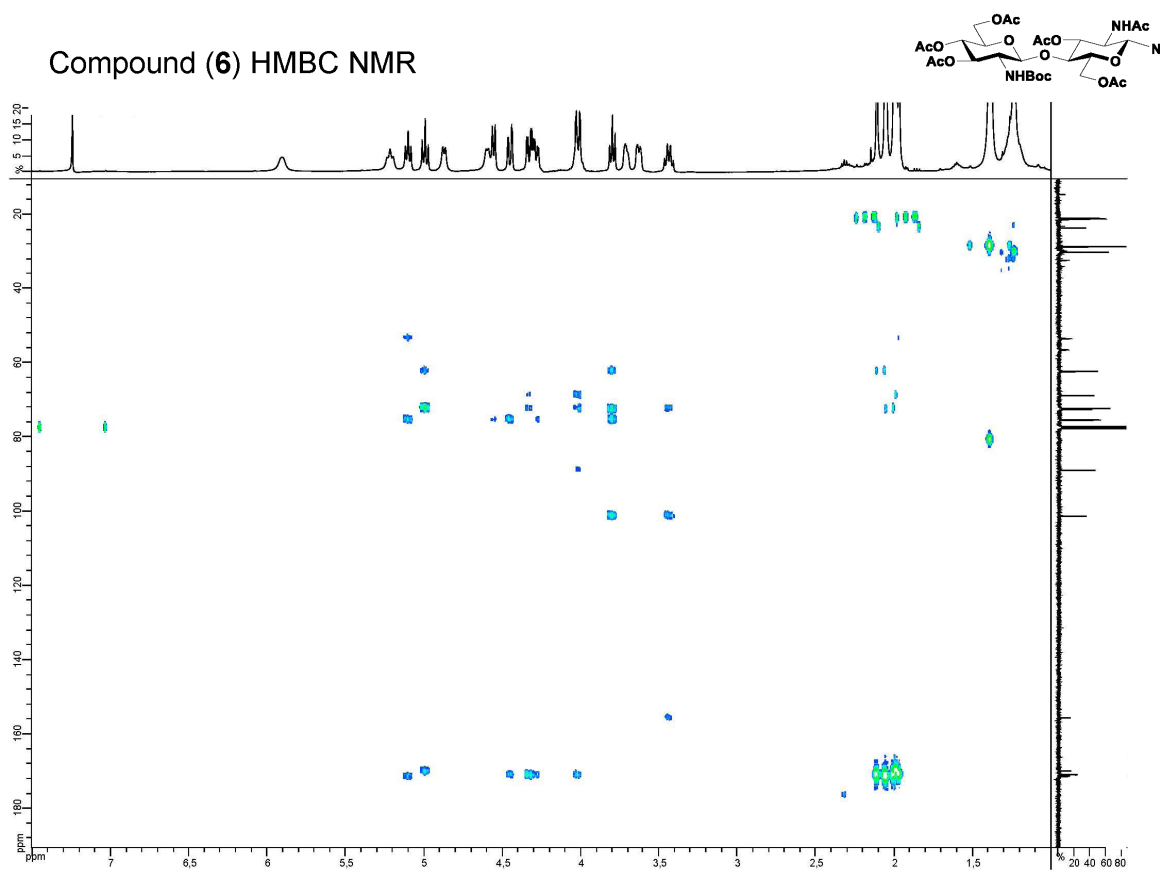

Compound (6) HMBC NMR

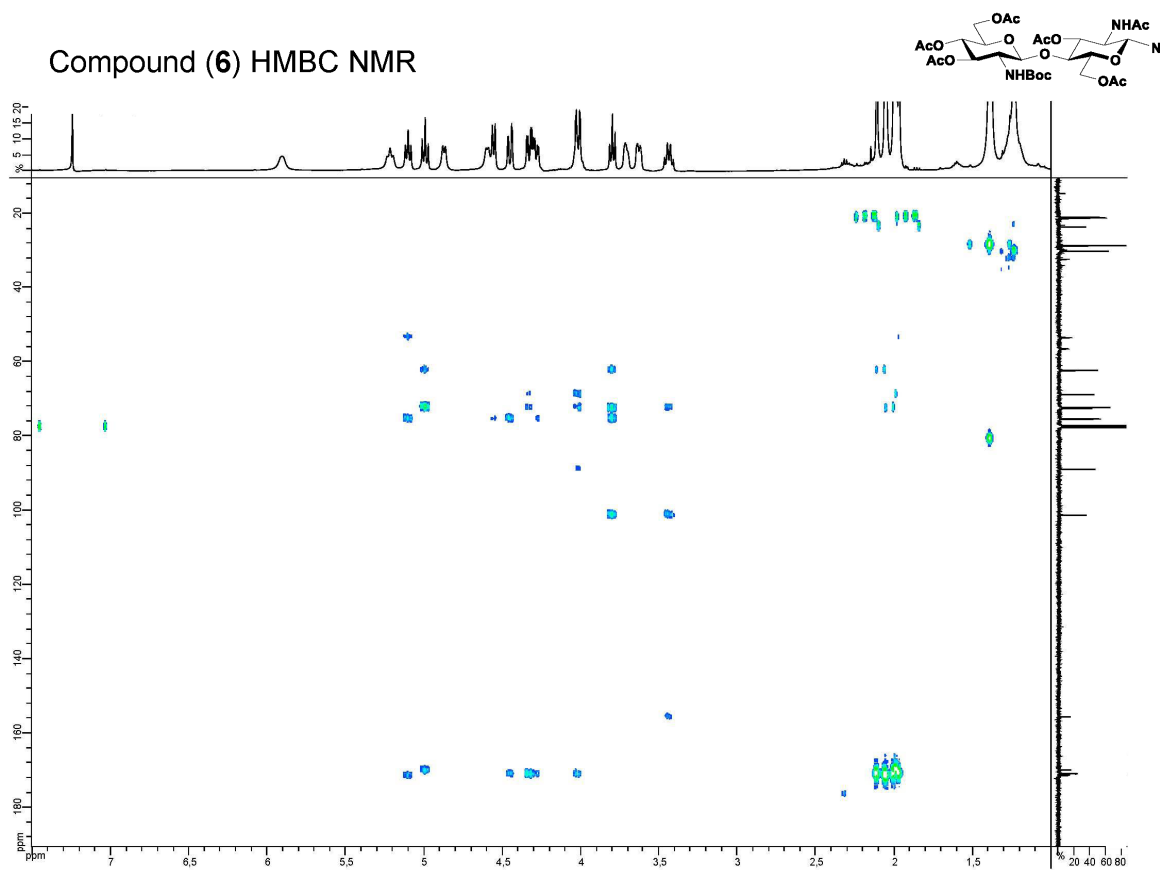



Compound (5) COSY NMR

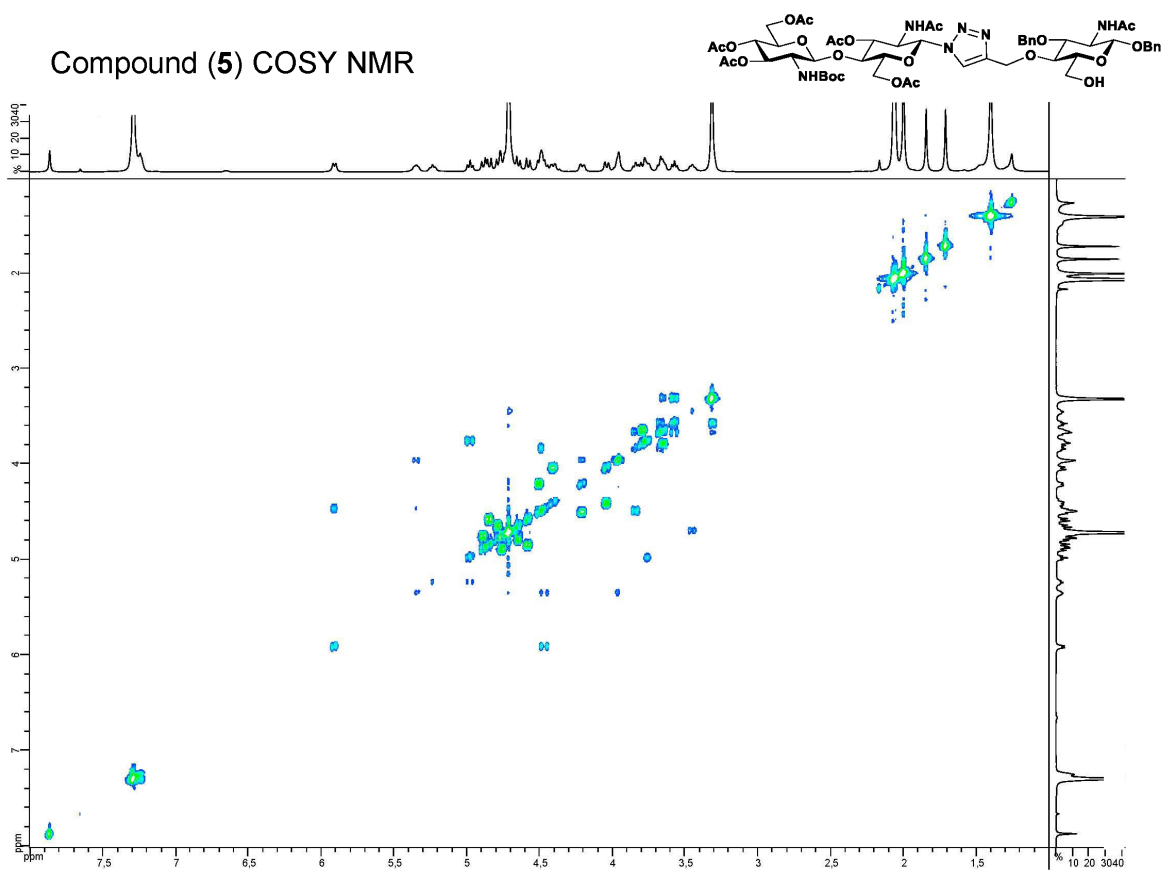

Compound (5) COSY NMR

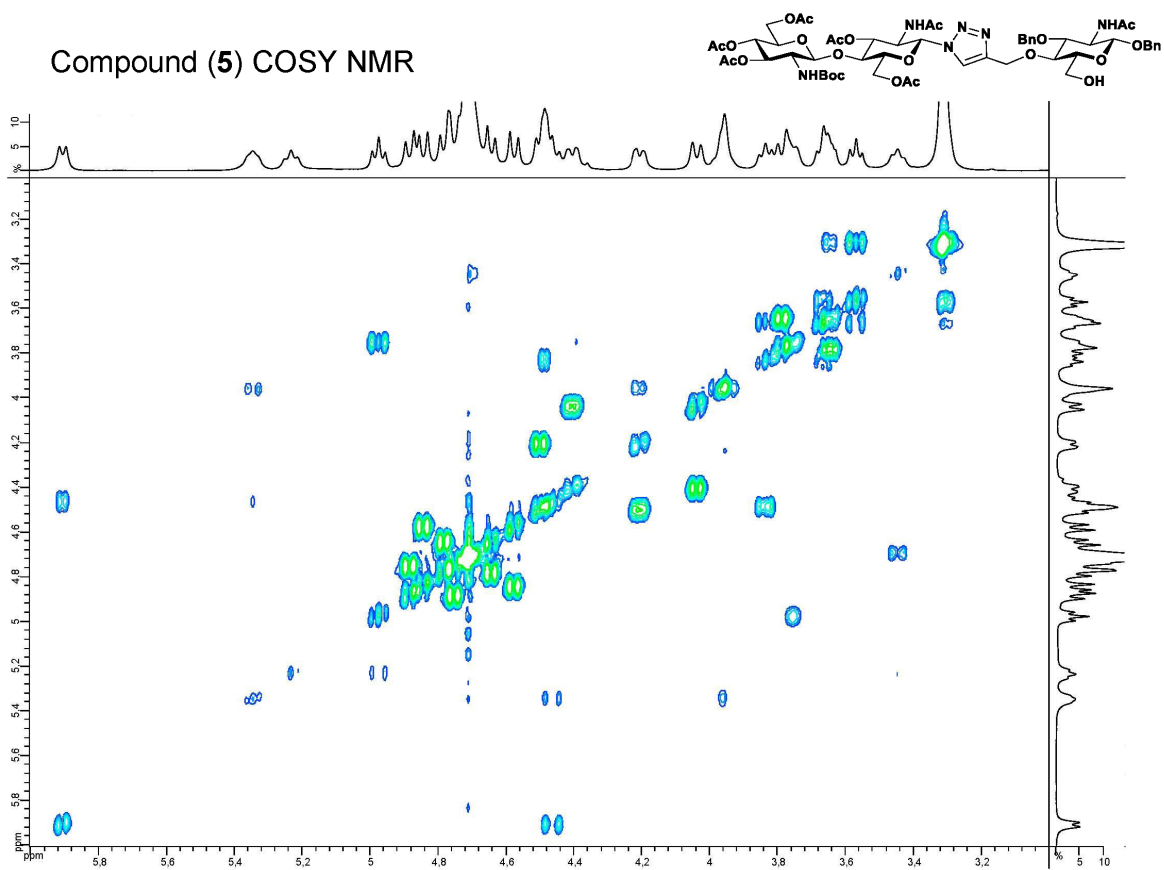

Compound (5)  $^{13}\text{C}$  NMR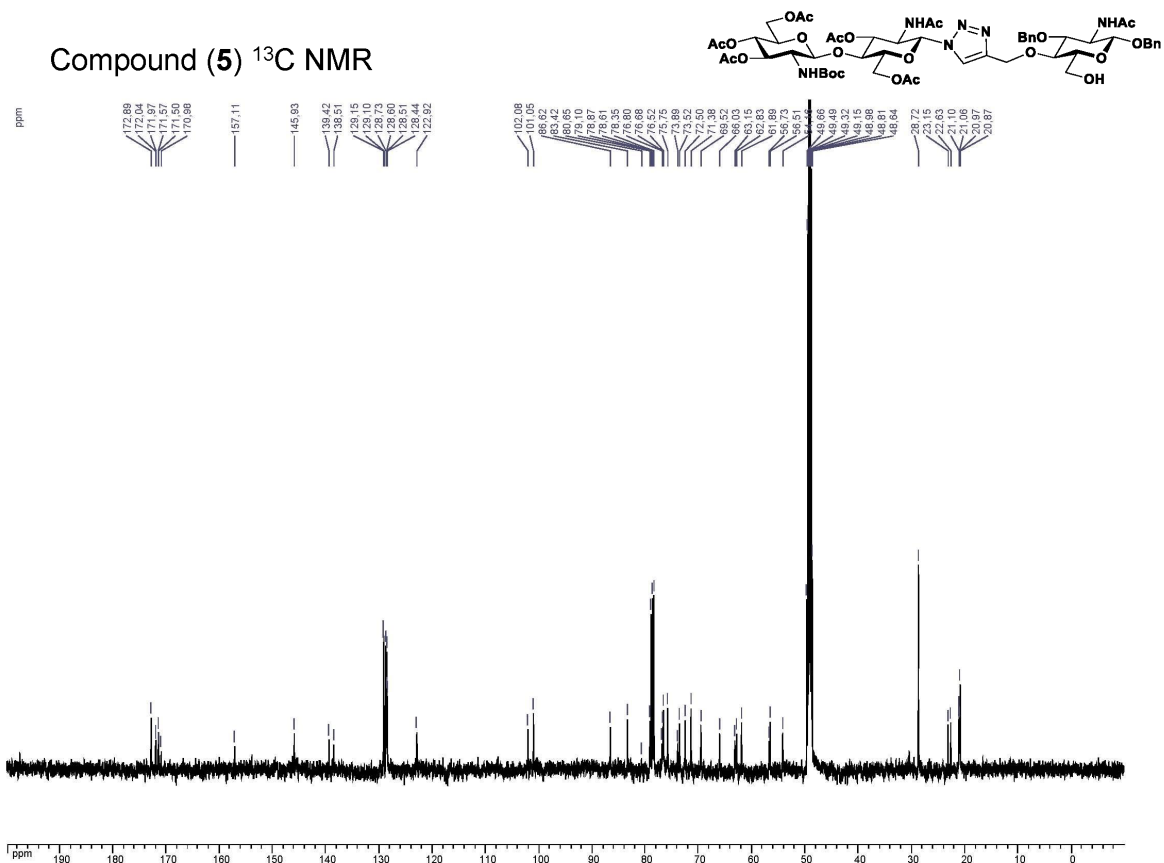

## Compound (5) HSQC NMR

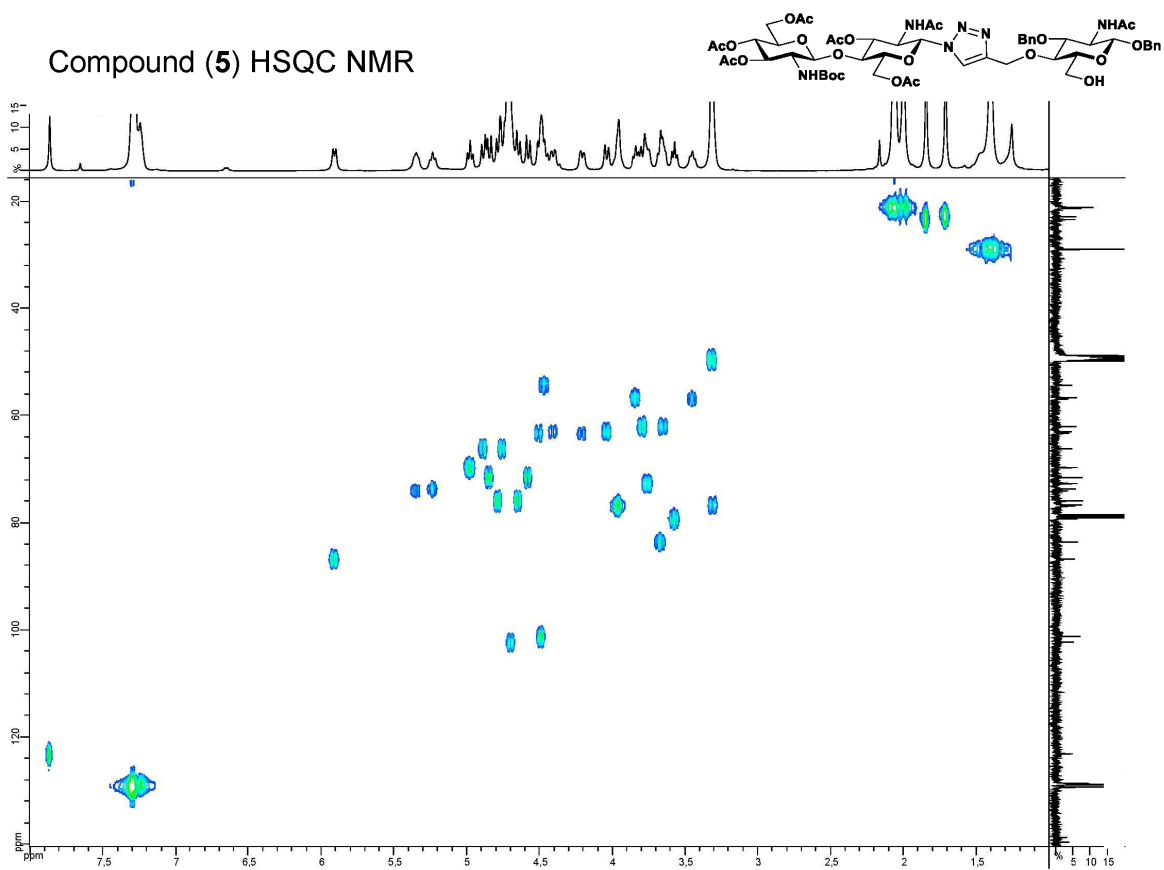

Compound (5) HMBC NMR

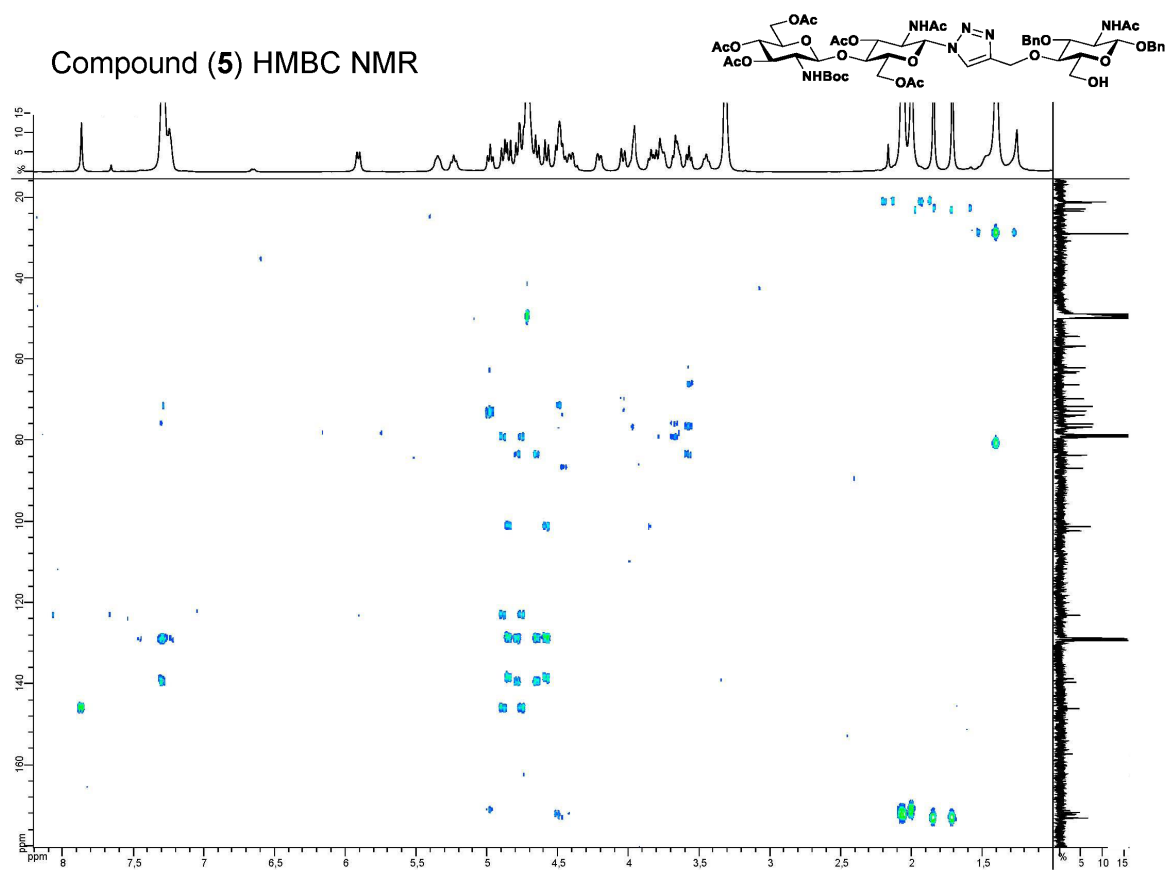

Compound (18) <sup>1</sup>H NMR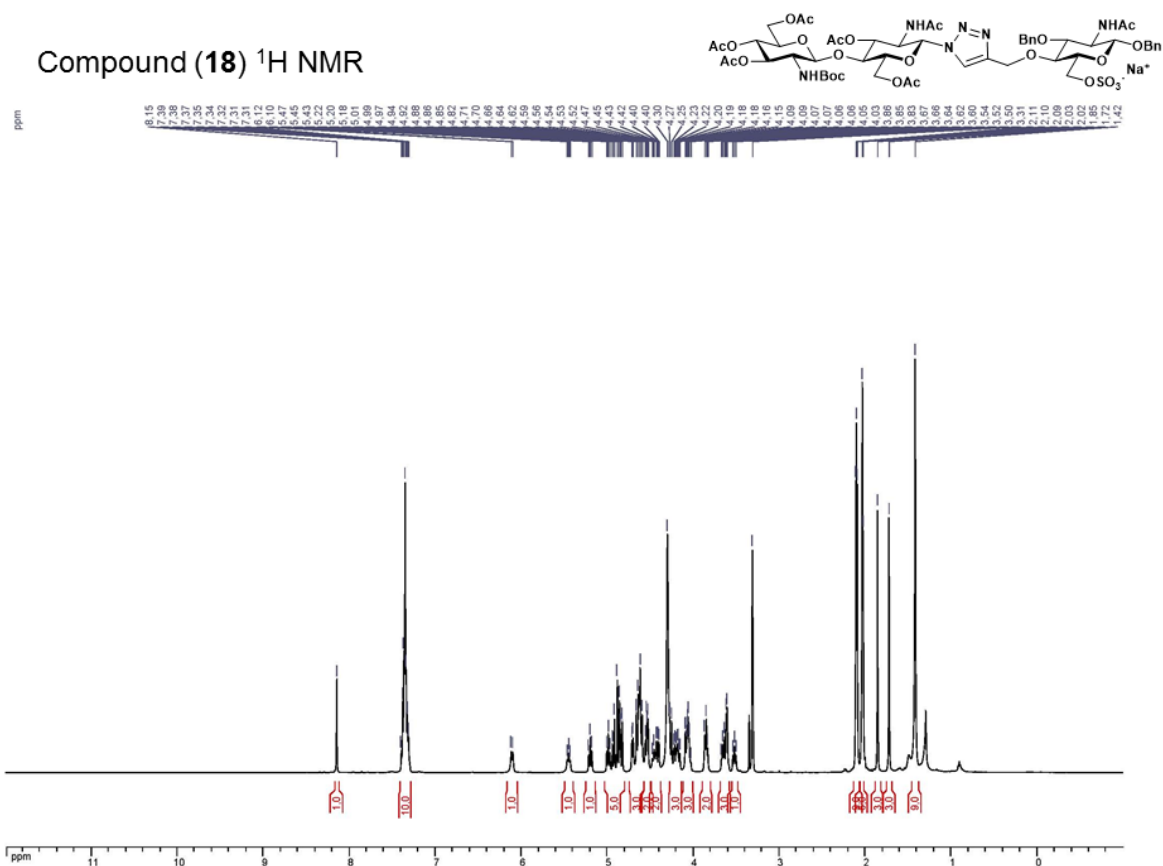Compound (18) <sup>1</sup>H NMR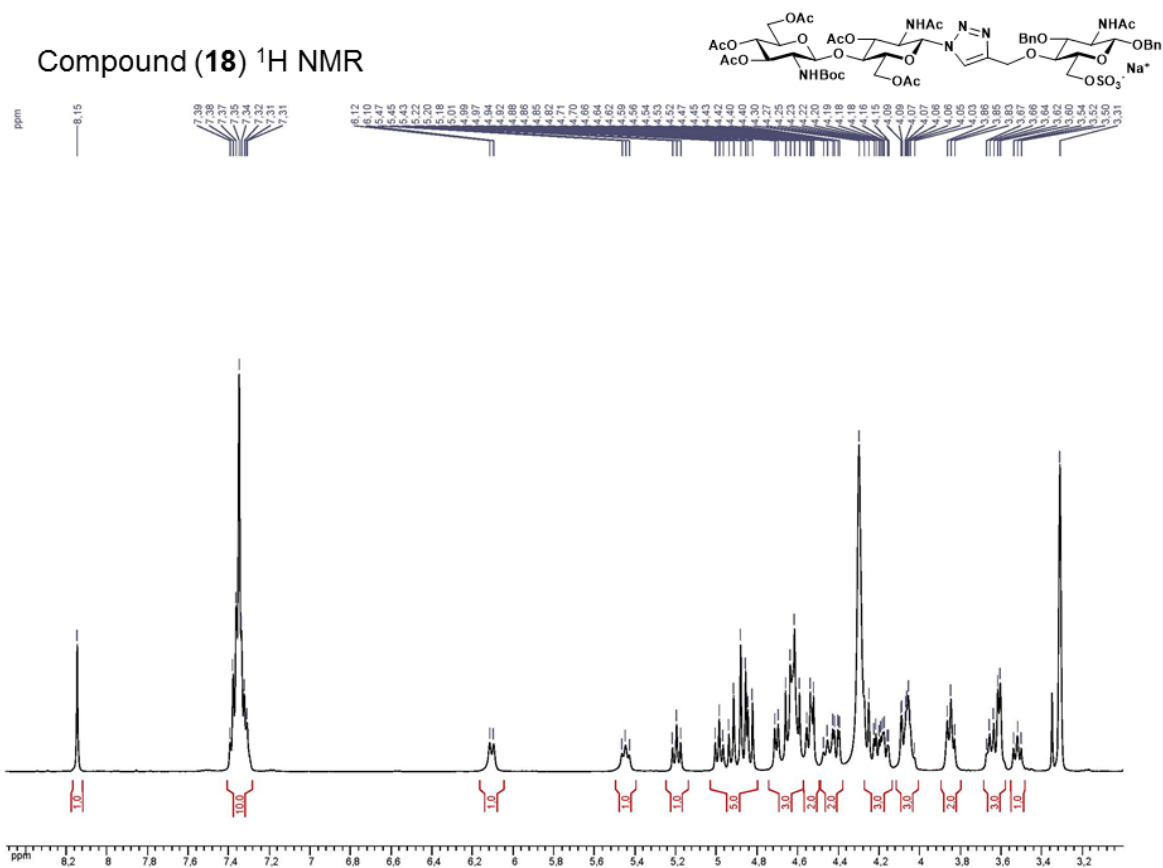

Compound (18) COSY NMR

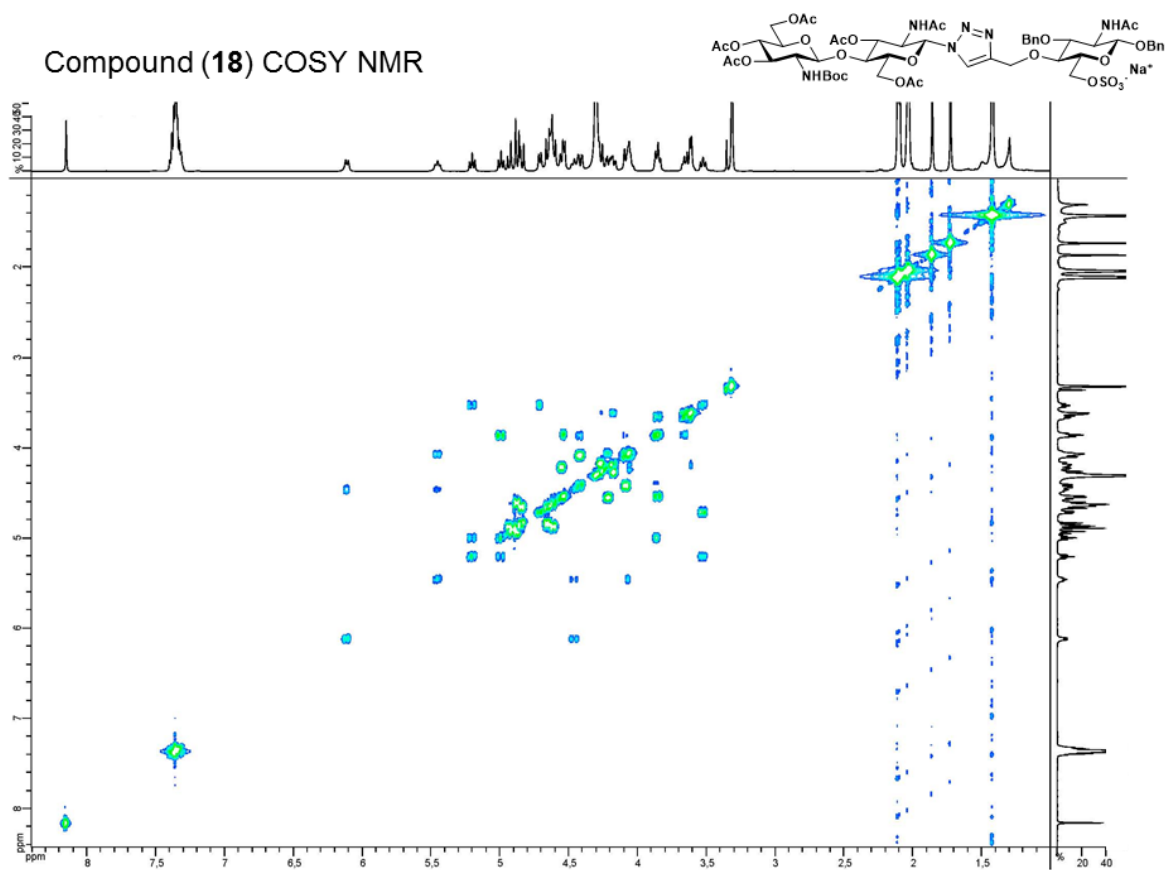

Compound (18) COSY NMR

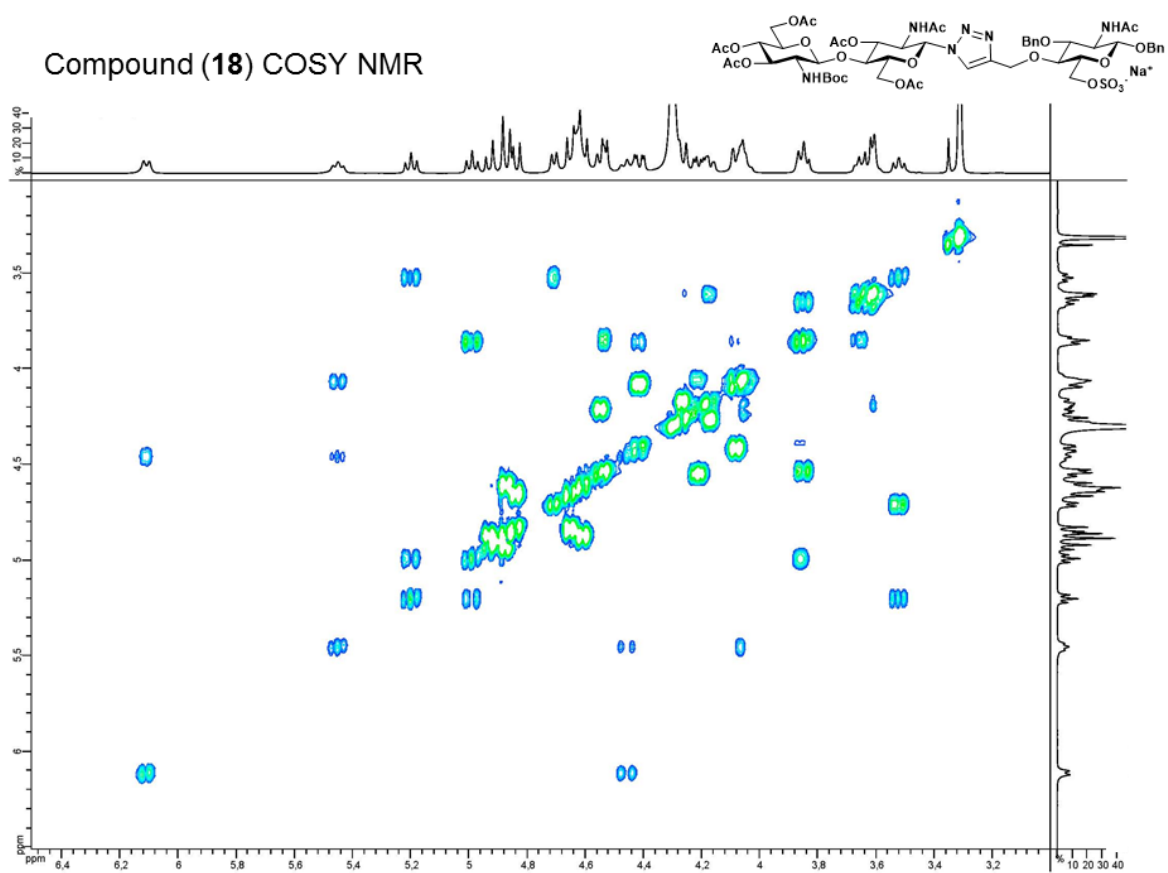

Compound (18)  $^{13}\text{C}$  NMR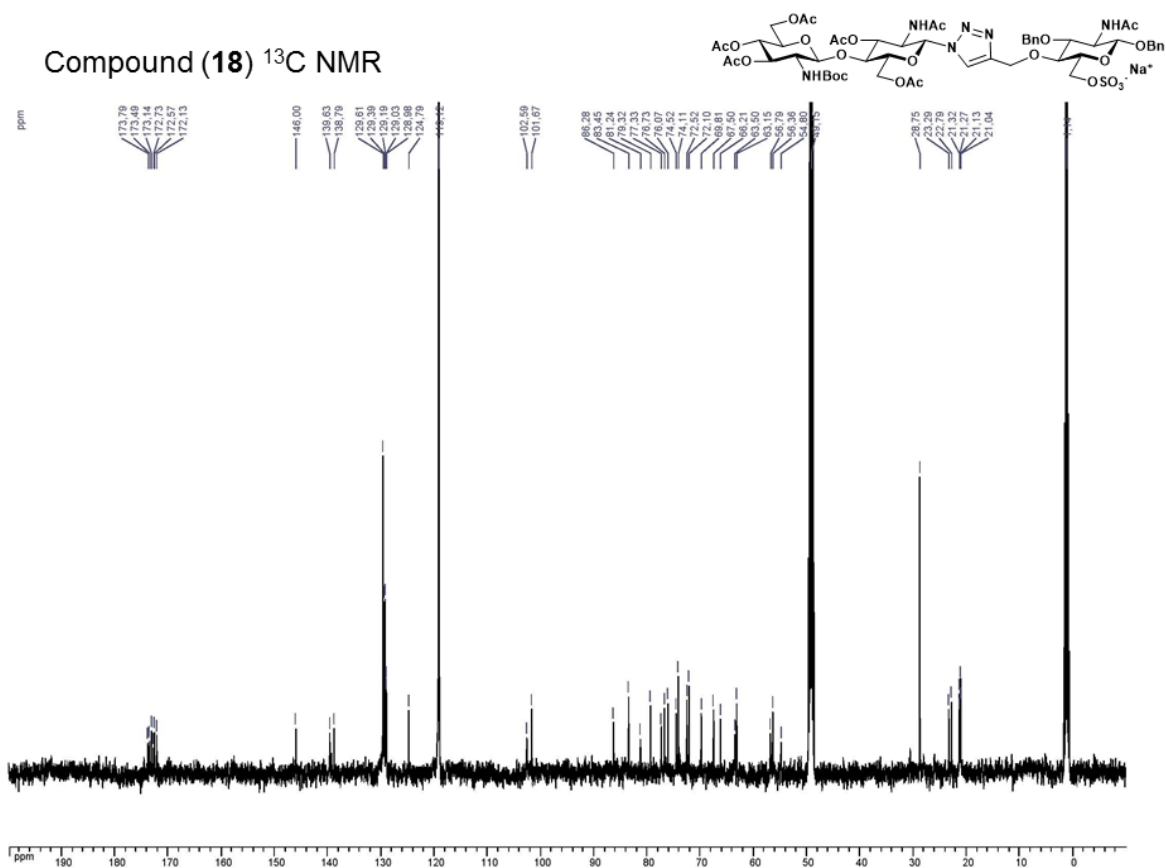

## Compound (18) HSQC NMR

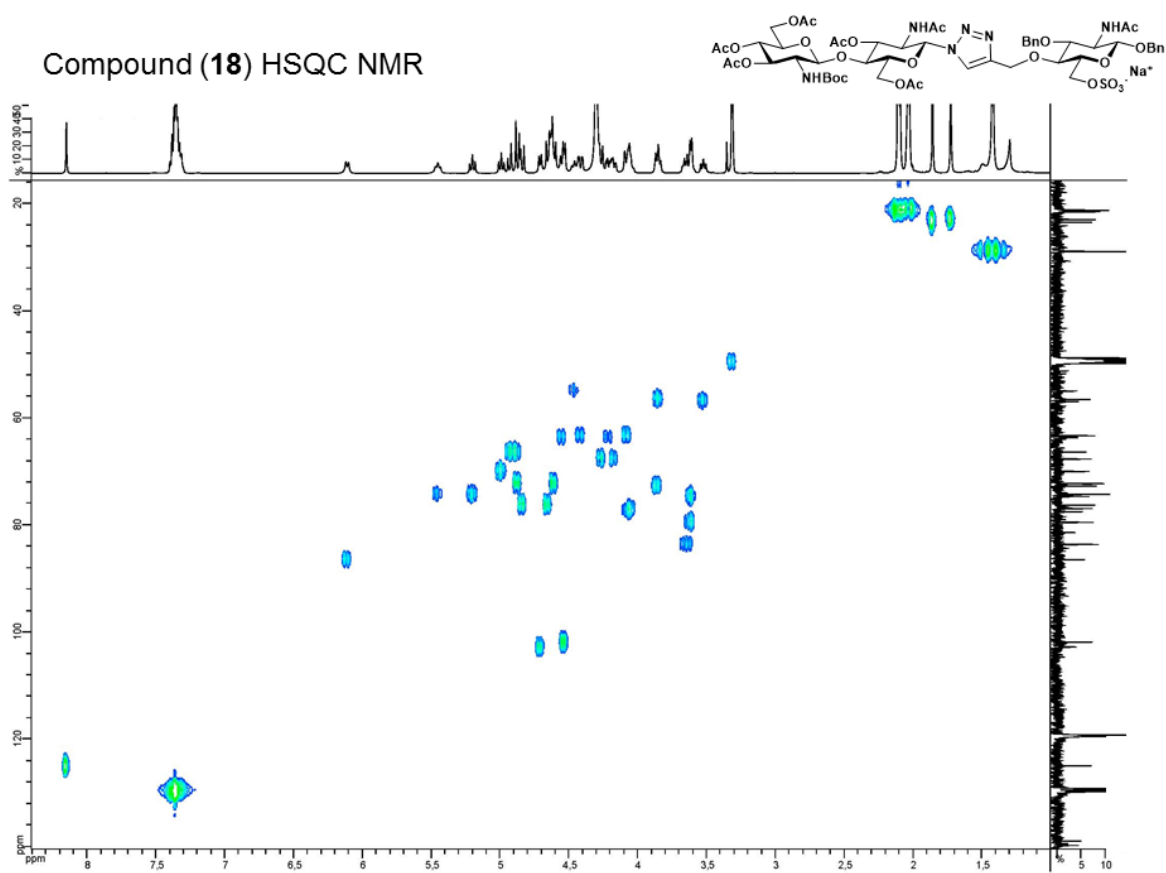



Compound (18) HMBC NMR

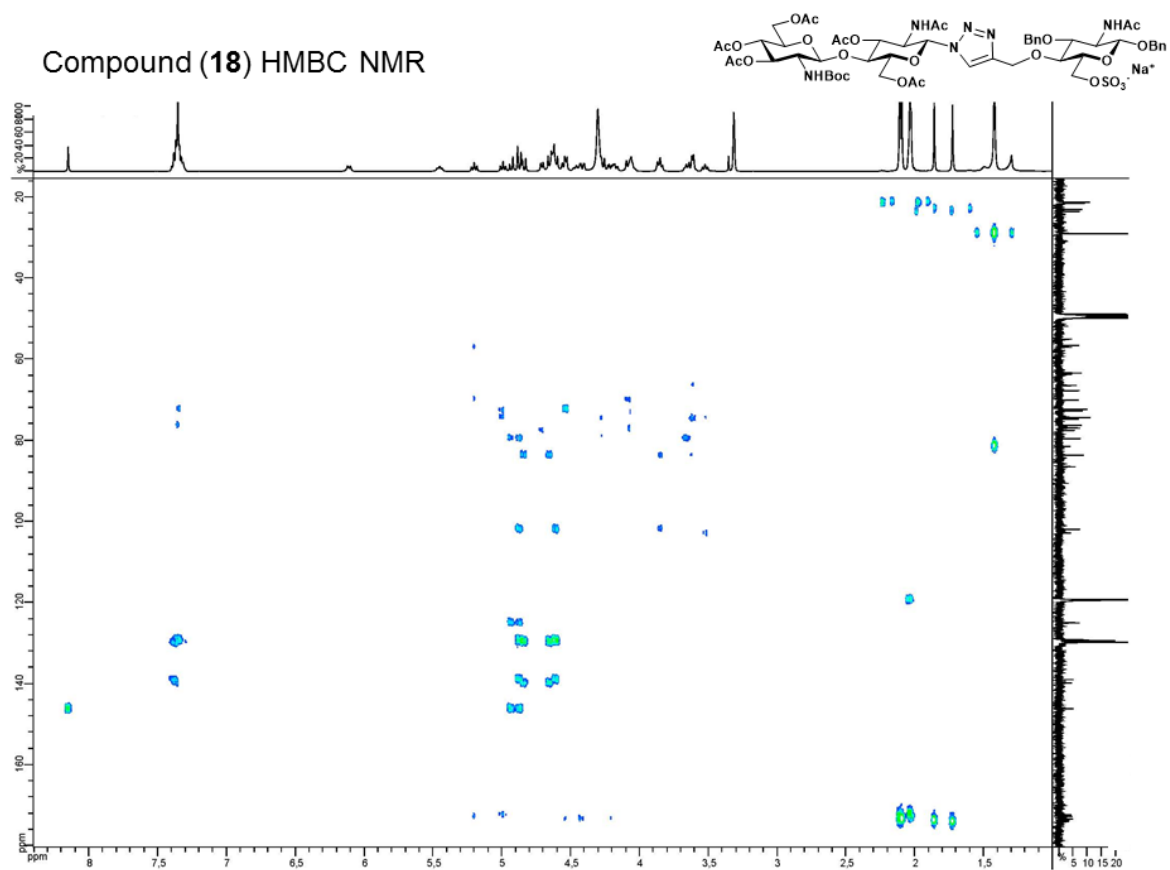



Compound (19) COSY NMR

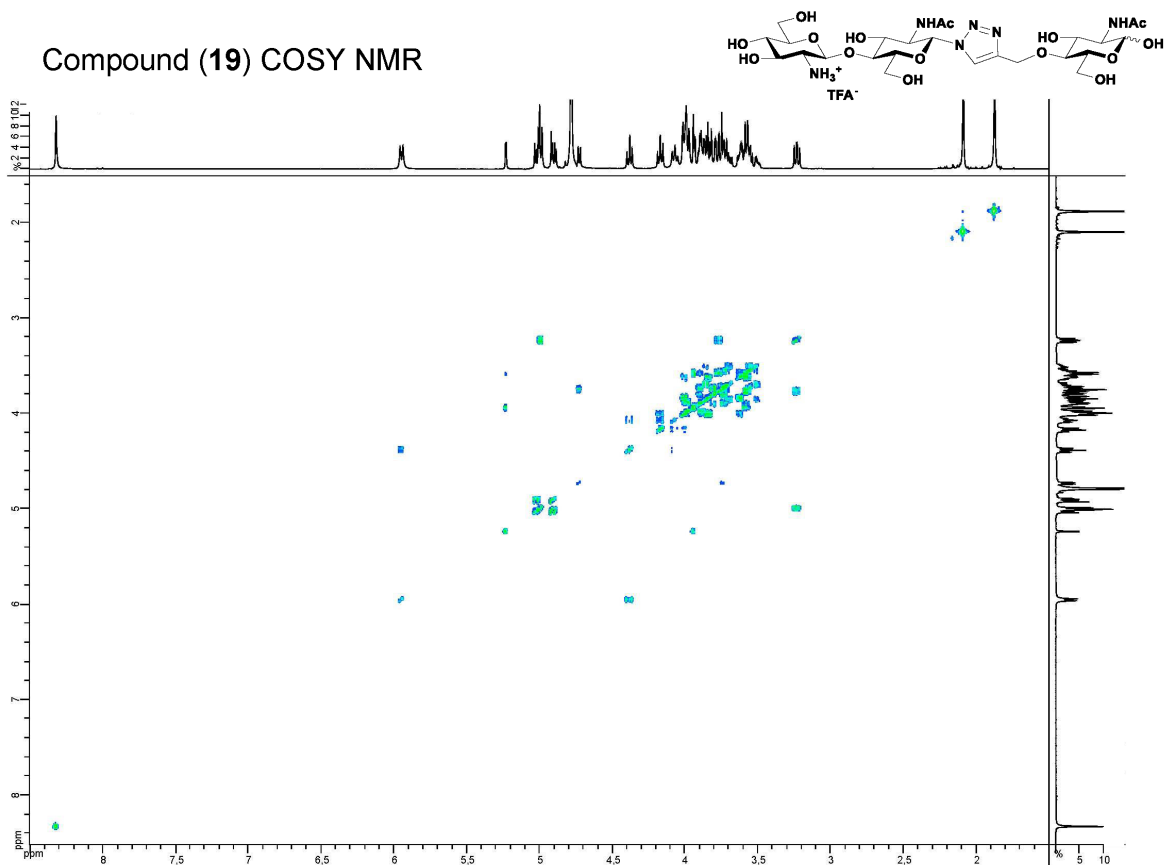

Compound (19) COSY NMR

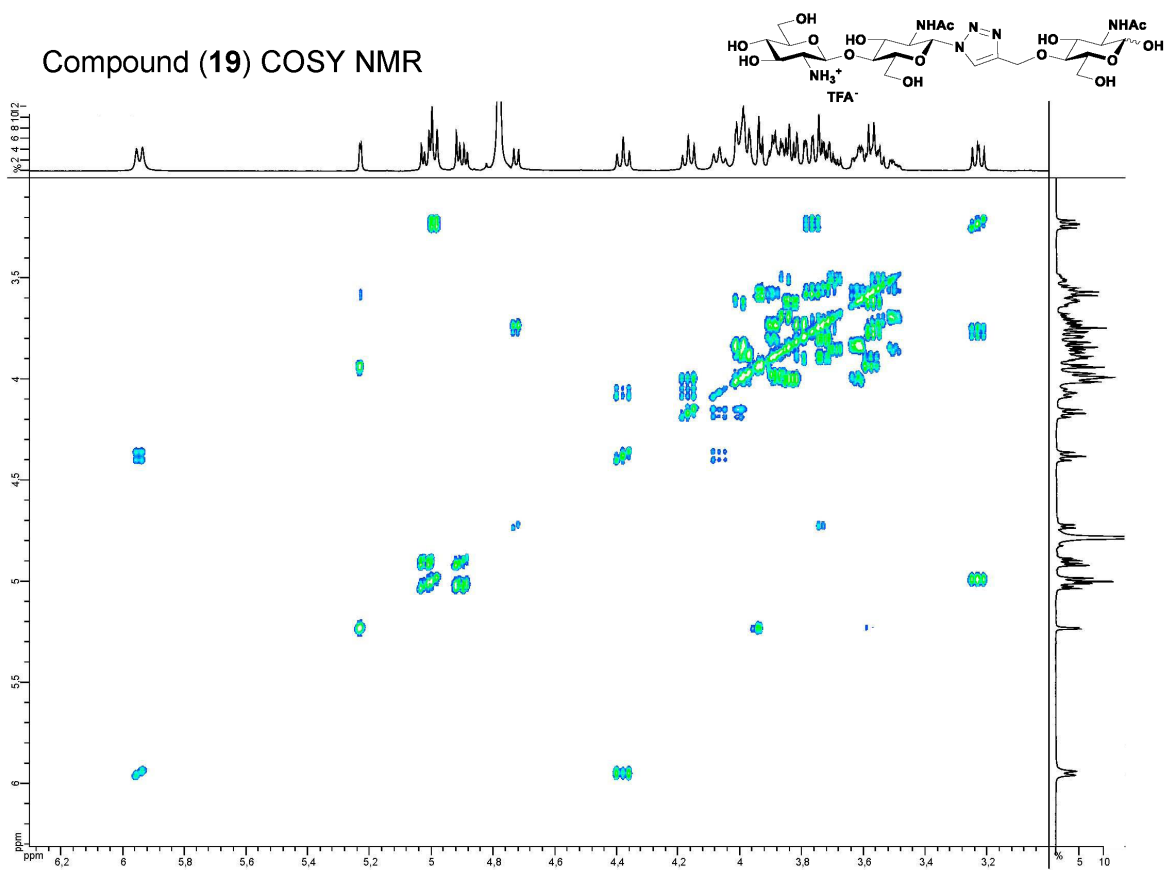

Compound (19)  $^{13}\text{C}$  NMR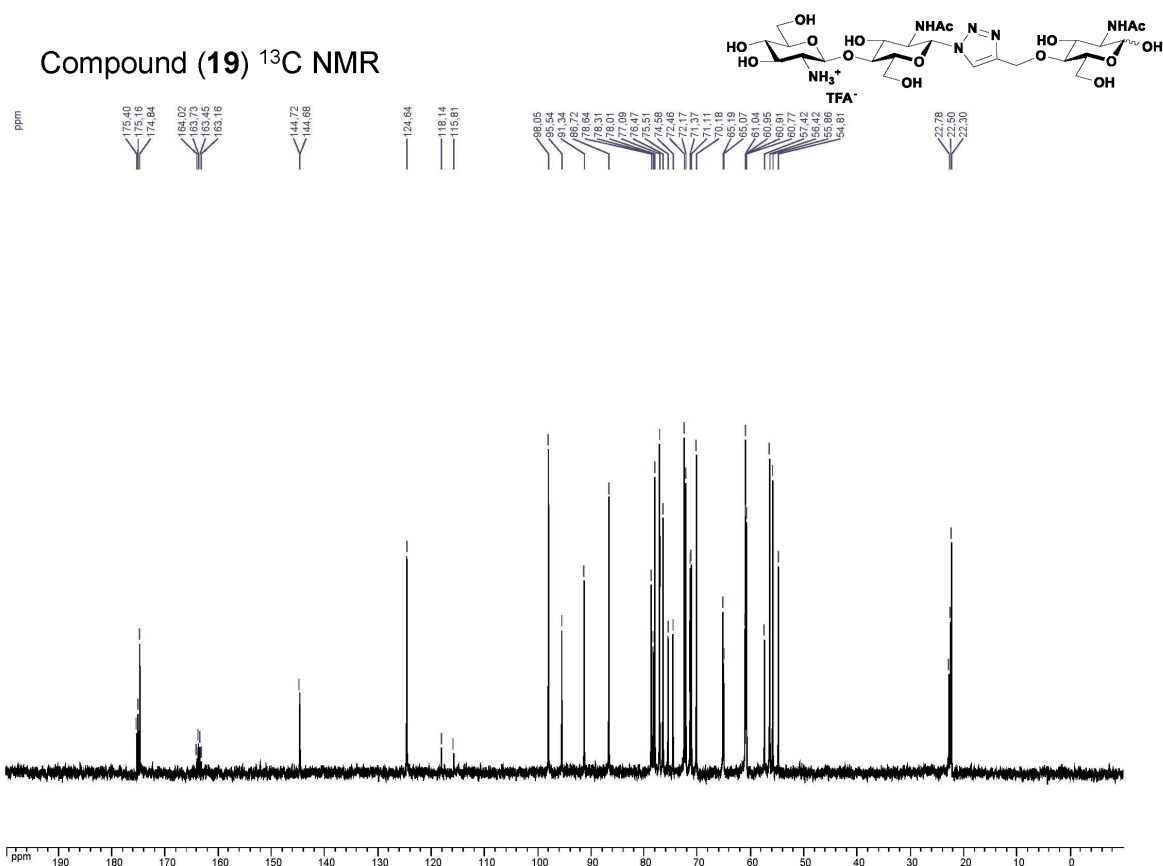

## Compound (19) HSQC NMR

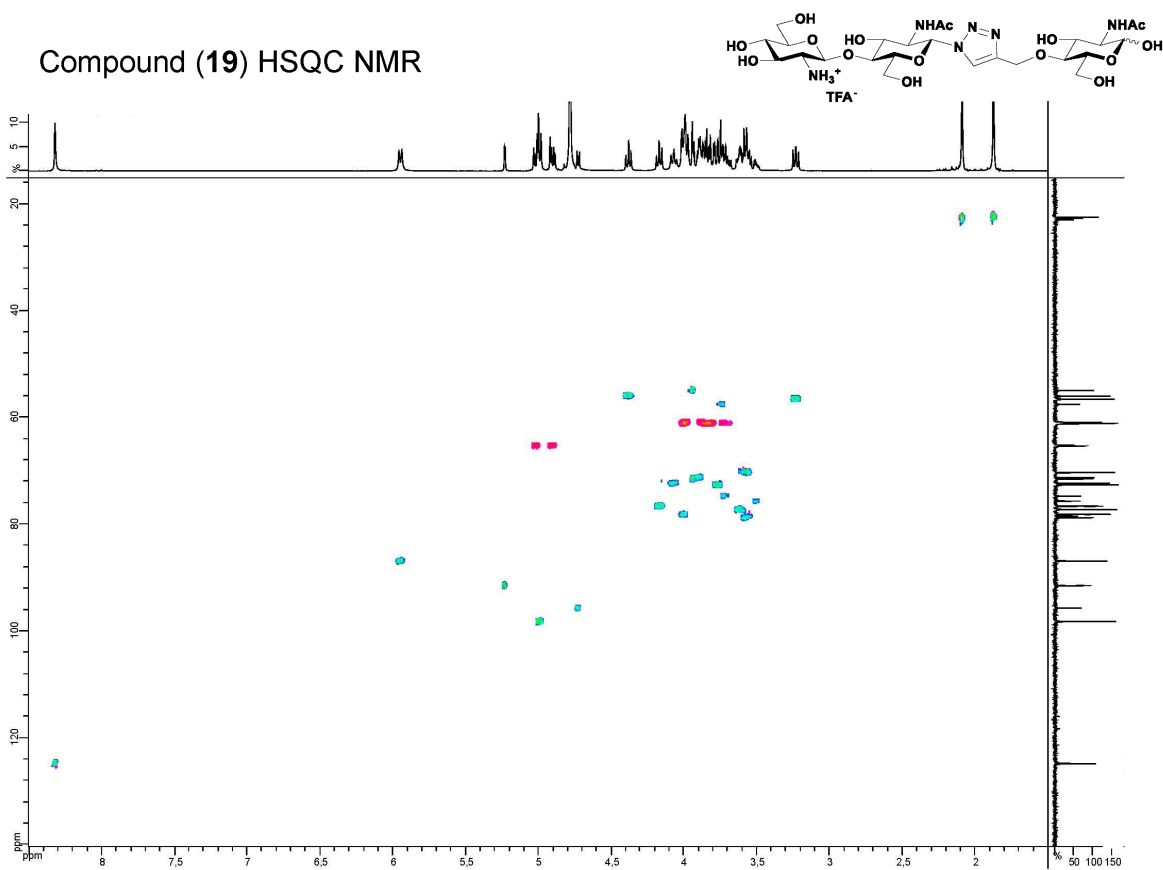

## Compound (19) HMBC NMR

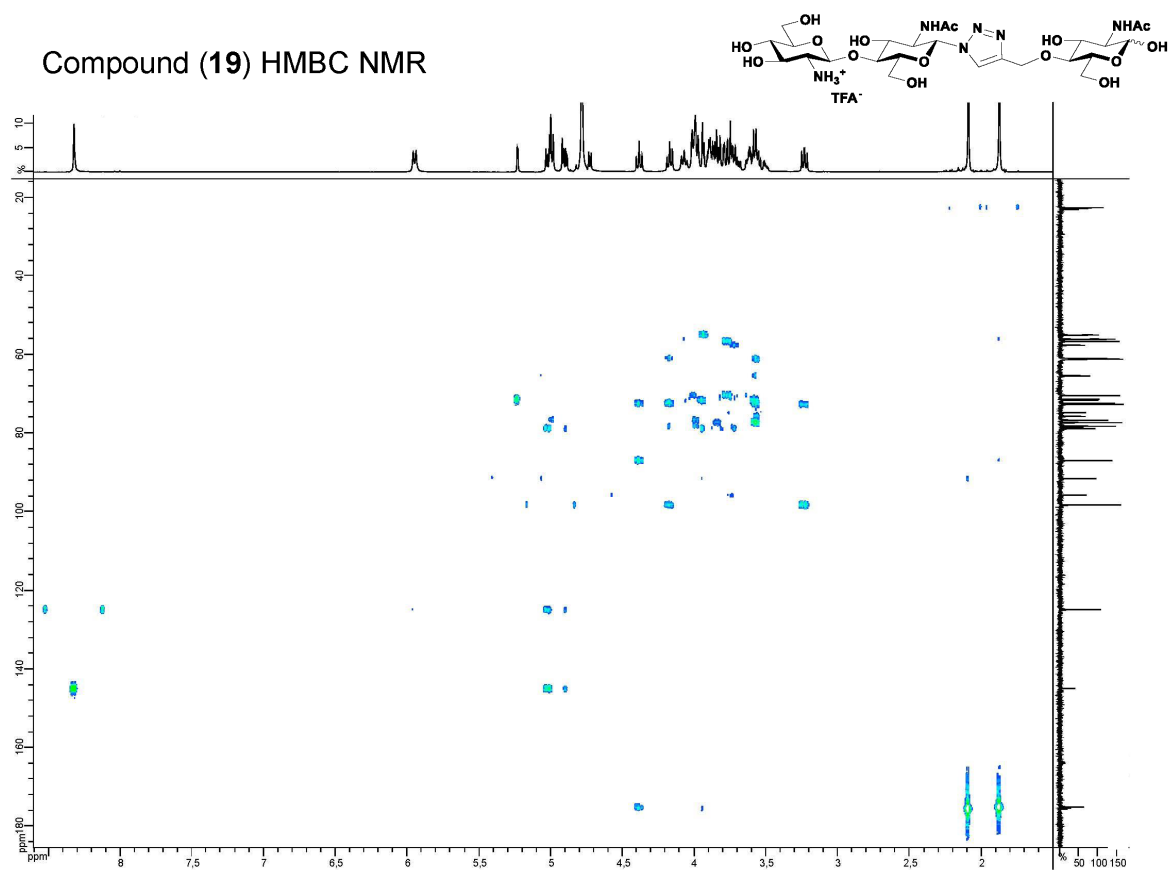

Compound (20)  $^1\text{H}$  NMR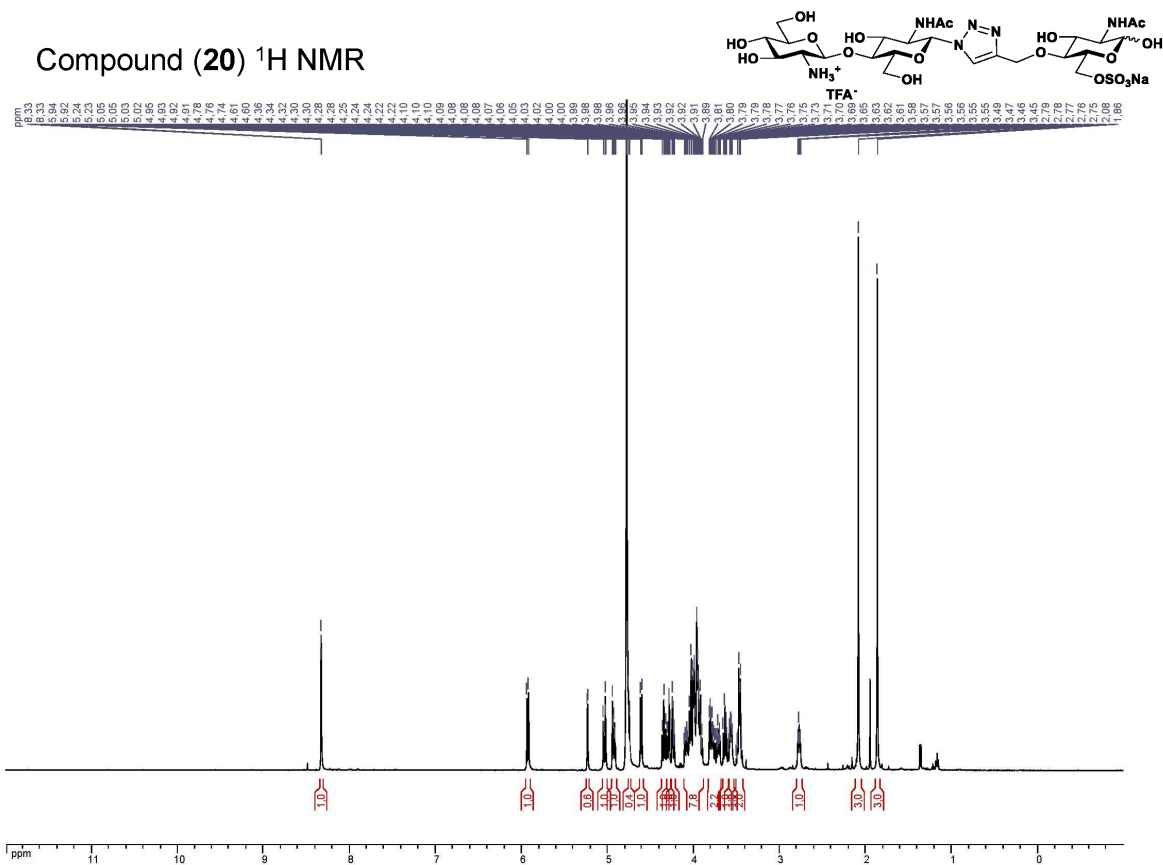Compound (20)  $^1\text{H}$  NMR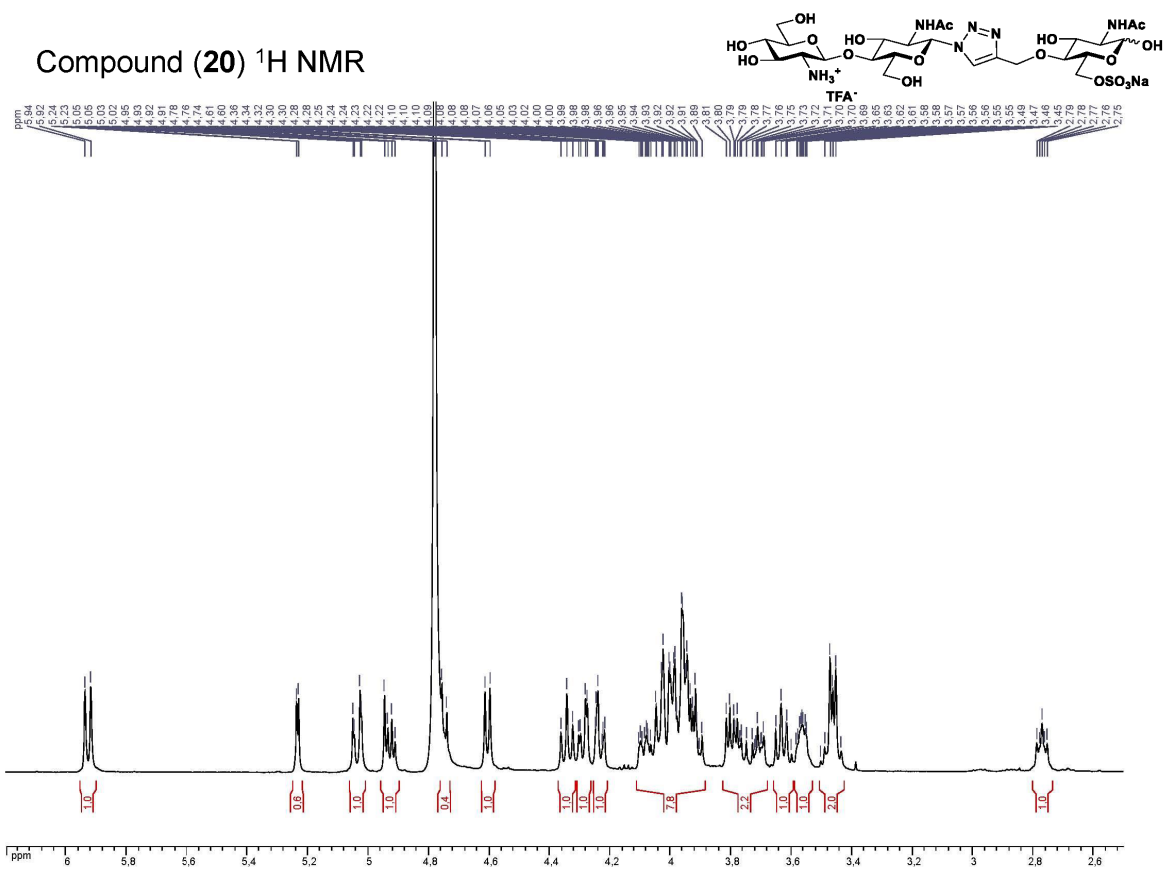

Compound (20) COSY NMR

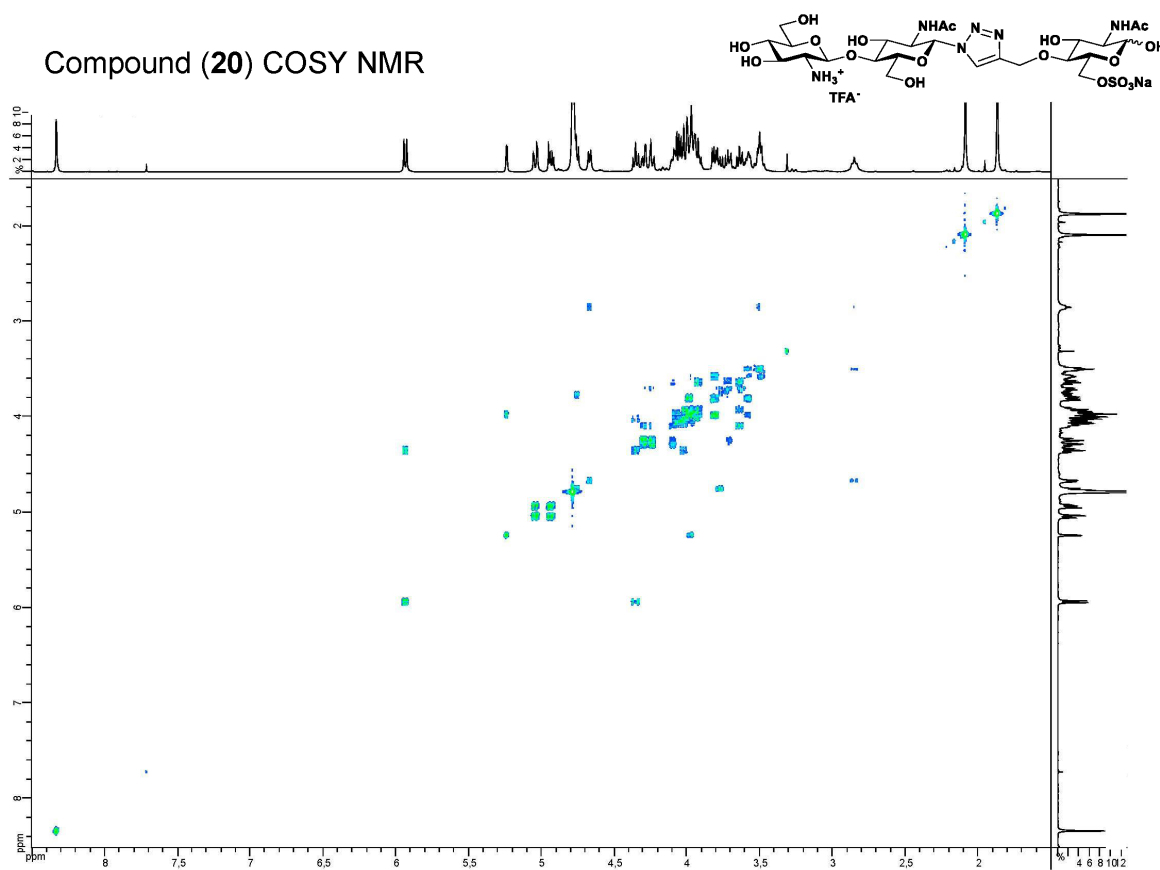

Compound (20) COSY NMR

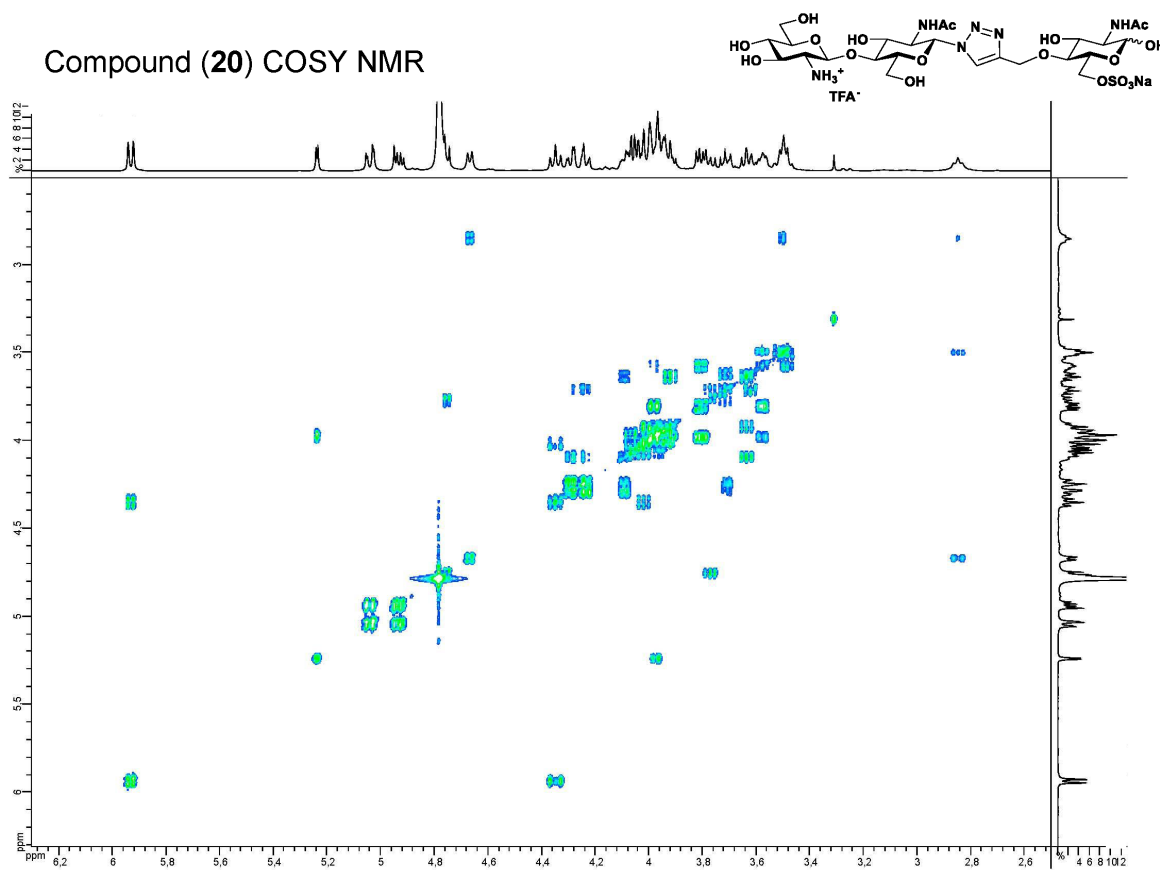

Compound (20)  $^{13}\text{C}$  NMR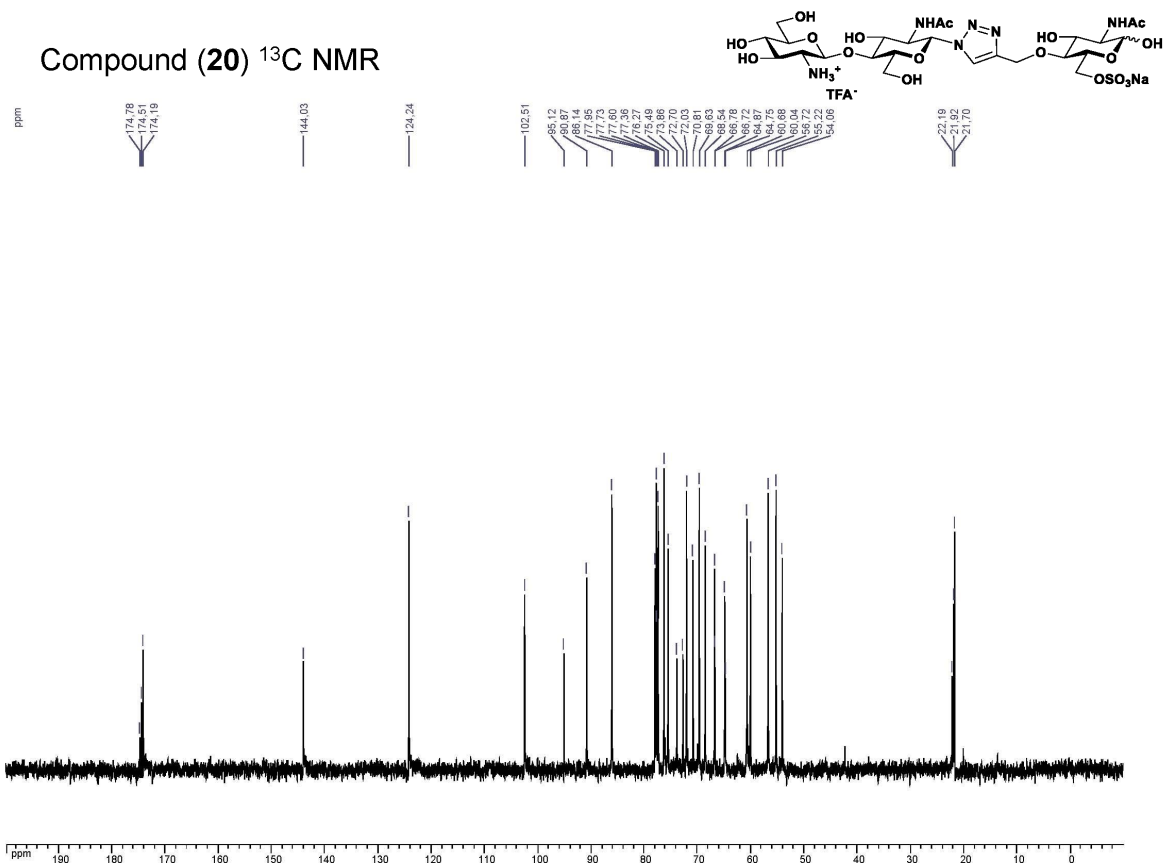

## Compound (20) HSQC NMR

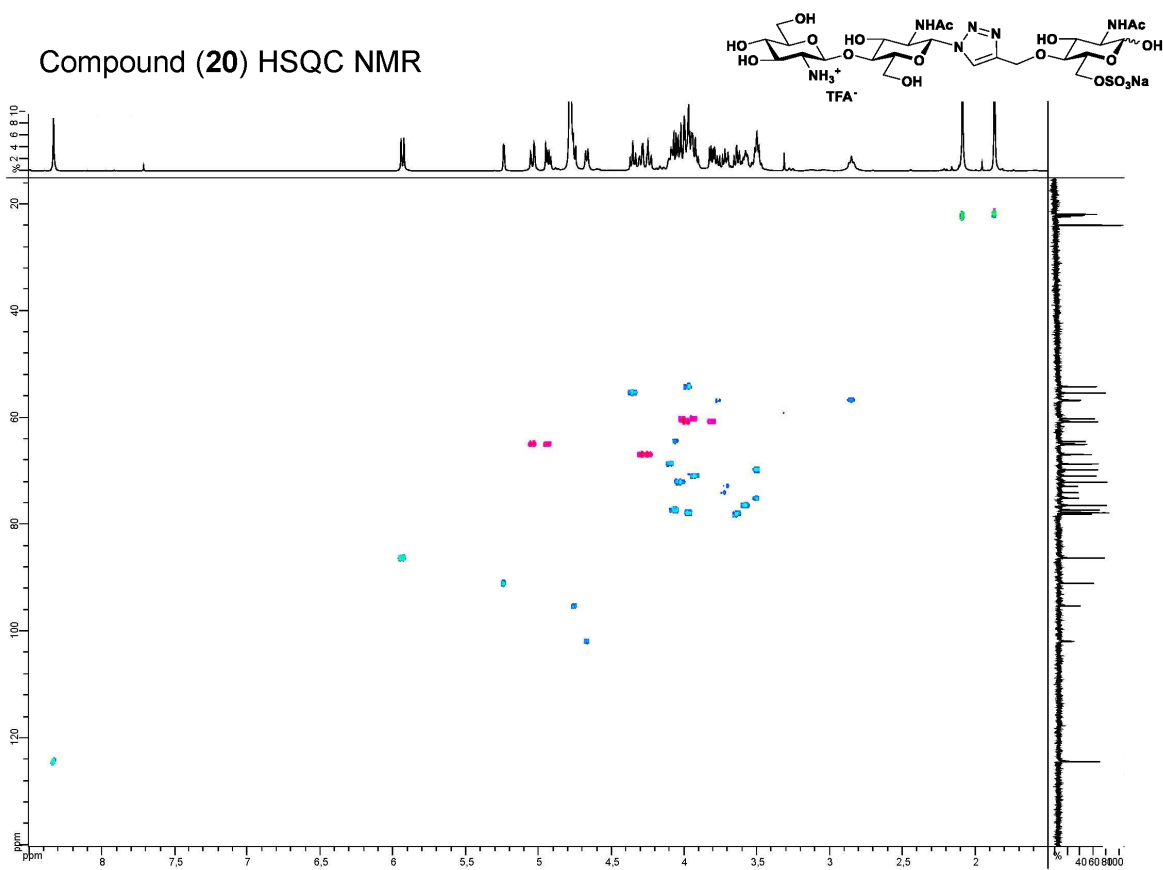



Compound (20) HMBC NMR

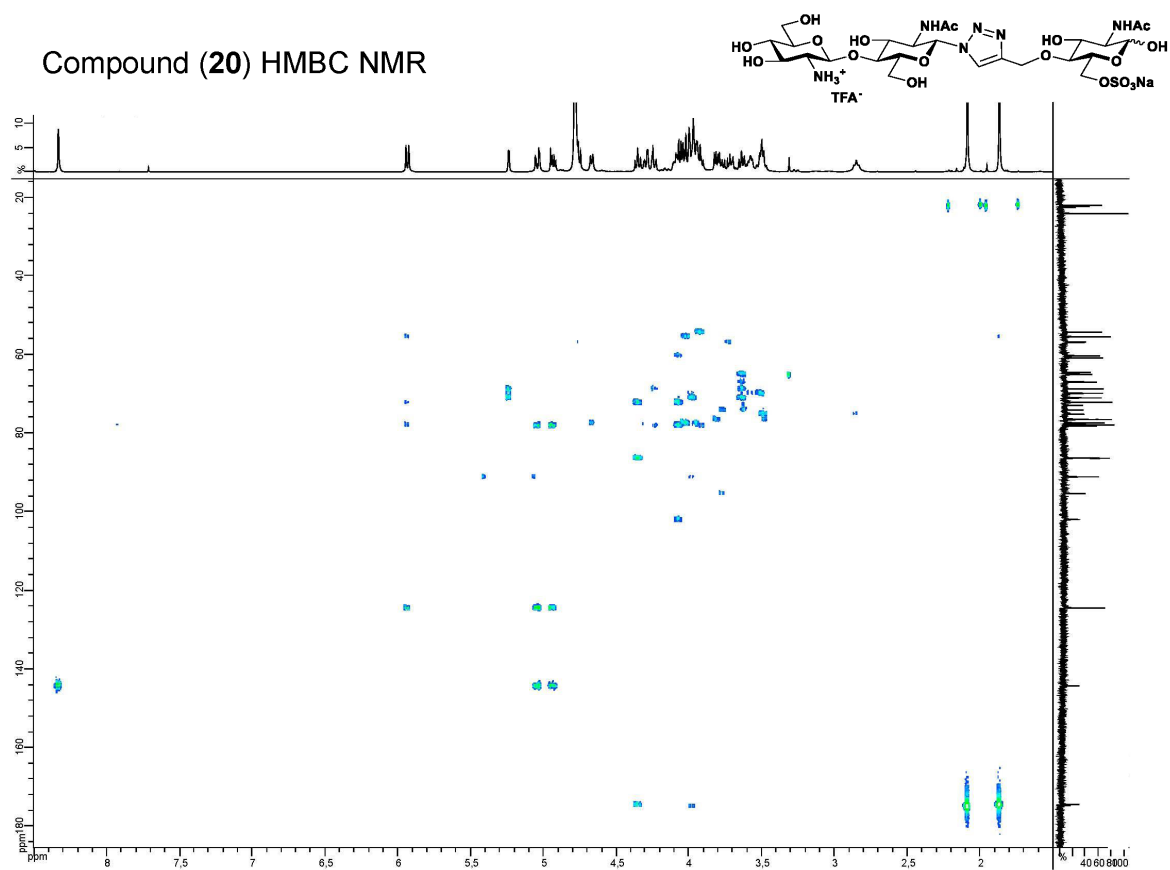

Compound (21)  $^1\text{H}$  NMR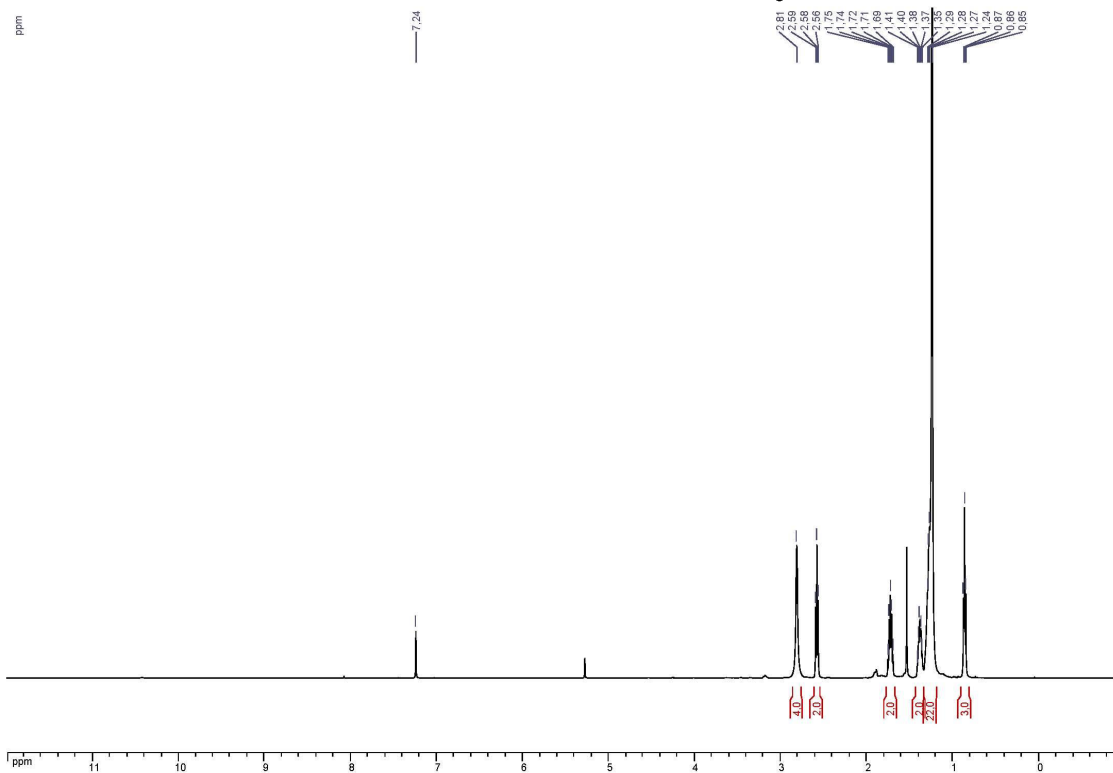Compound (21)  $^{13}\text{C}$  NMR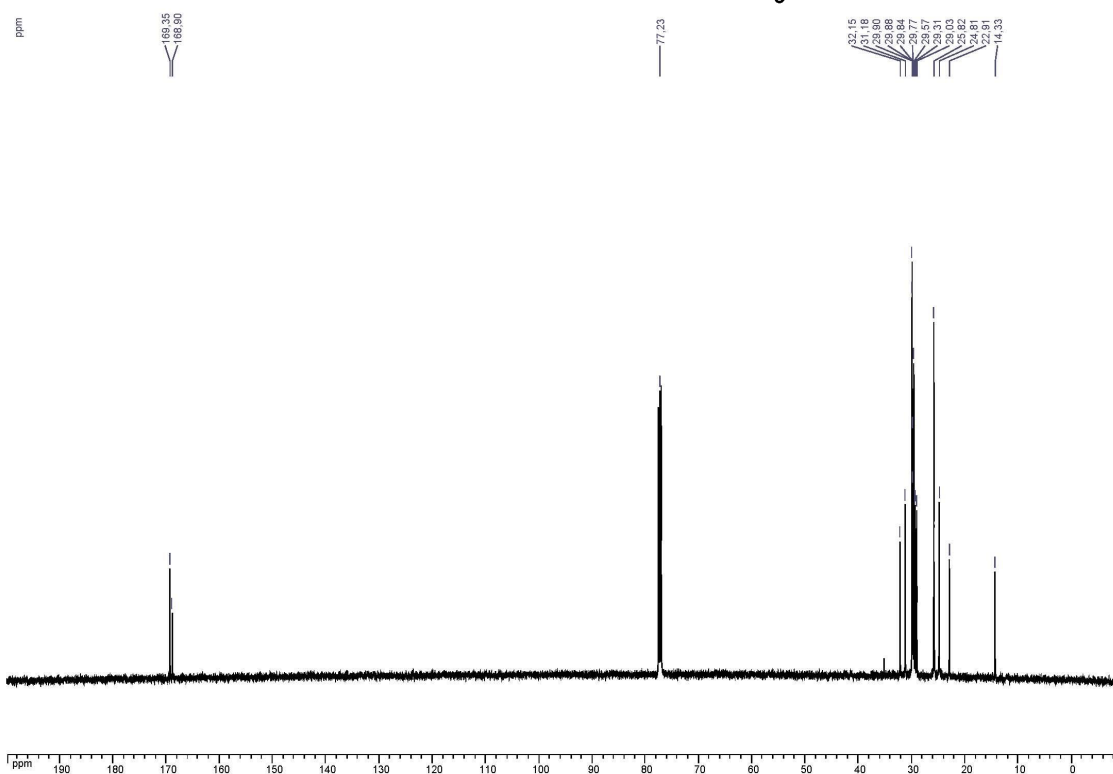

Compound (22)  $^1\text{H}$  NMR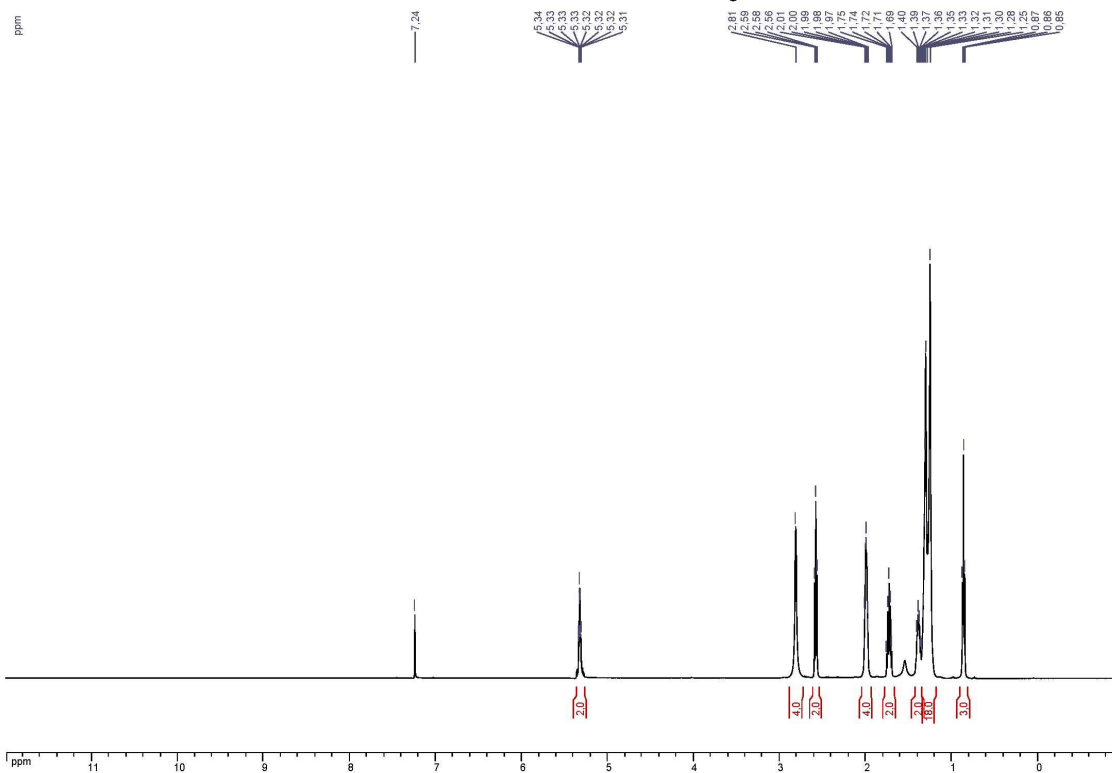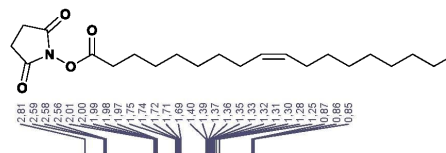Compound (22)  $^{13}\text{C}$  NMR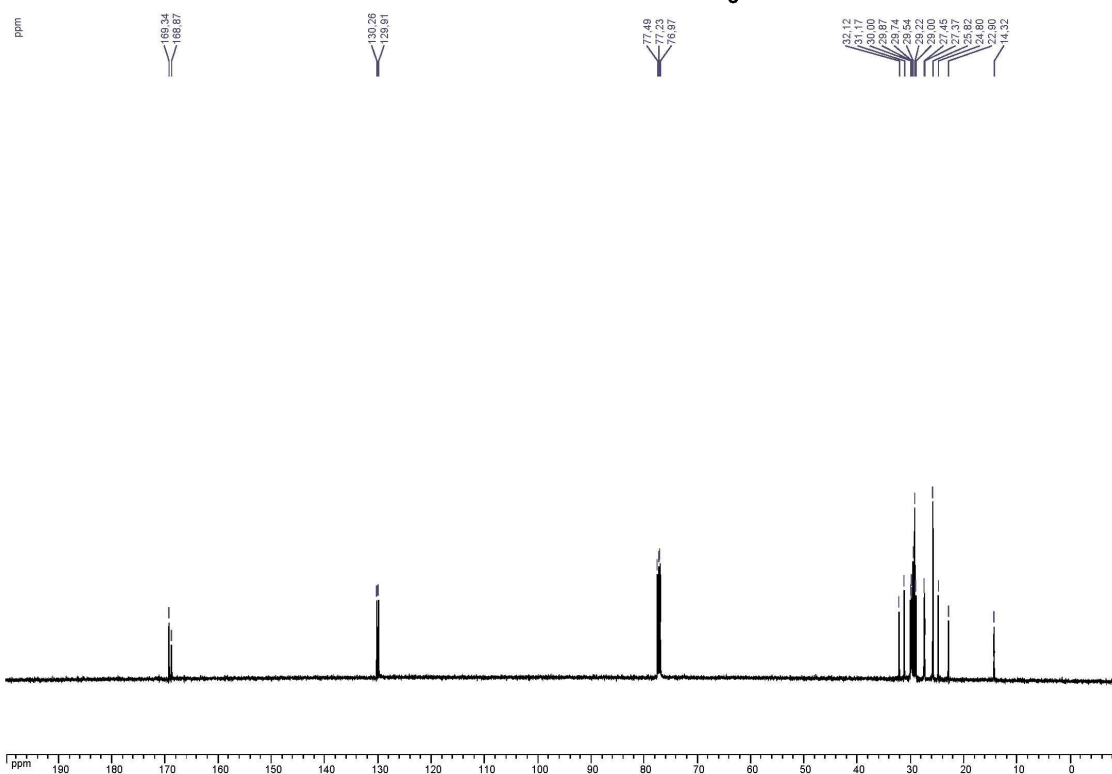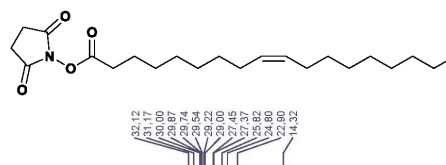

Compound (3) <sup>1</sup>H NMR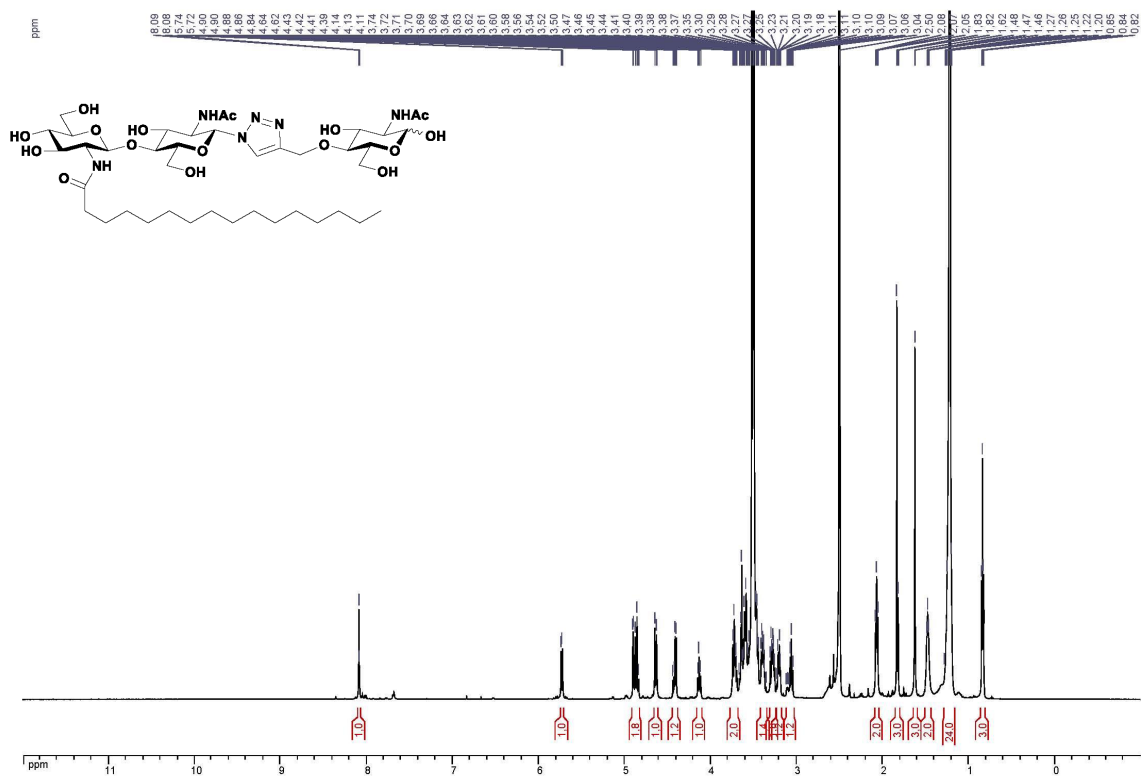Compound (3) <sup>1</sup>H NMR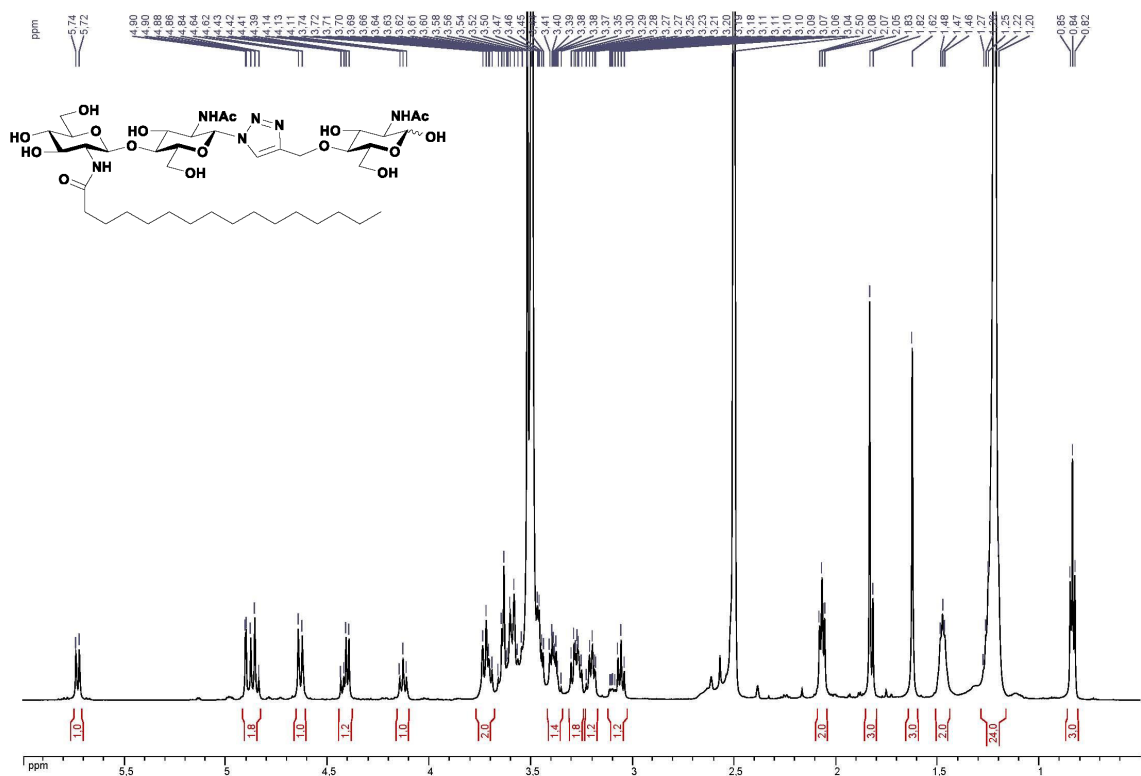

## Compound (3) COSY NMR

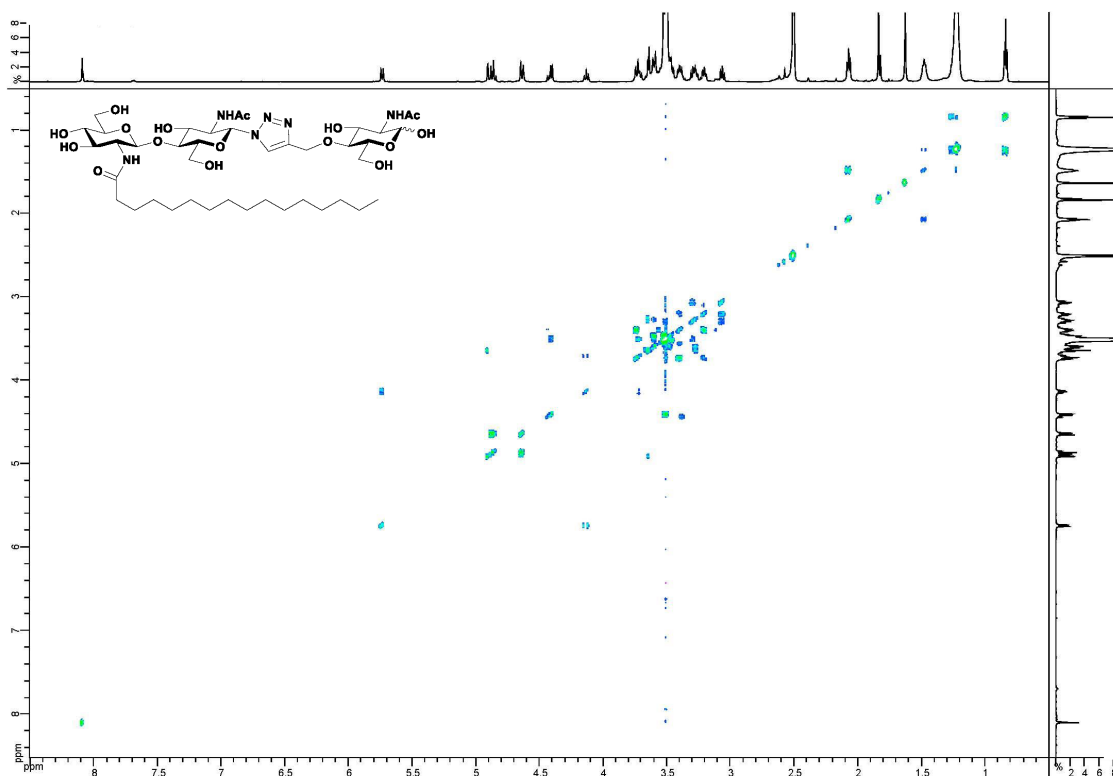

## Compound (3) COSY NMR

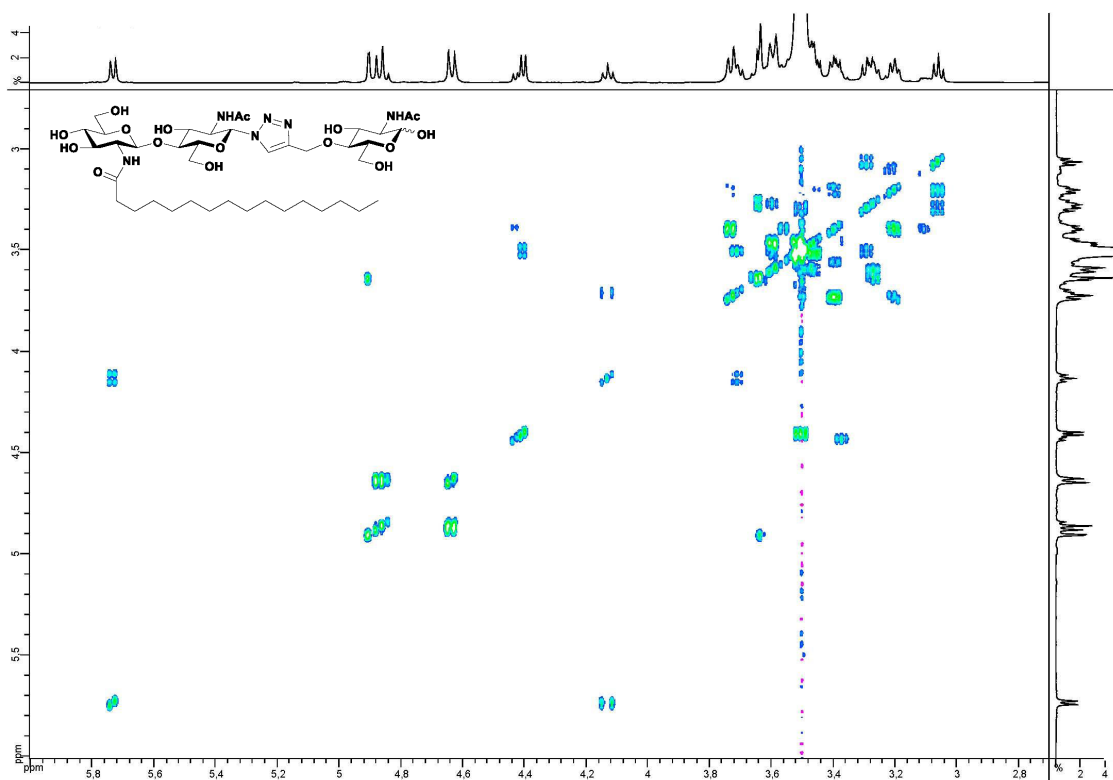

Compound (3)  $^{13}\text{C}$  NMR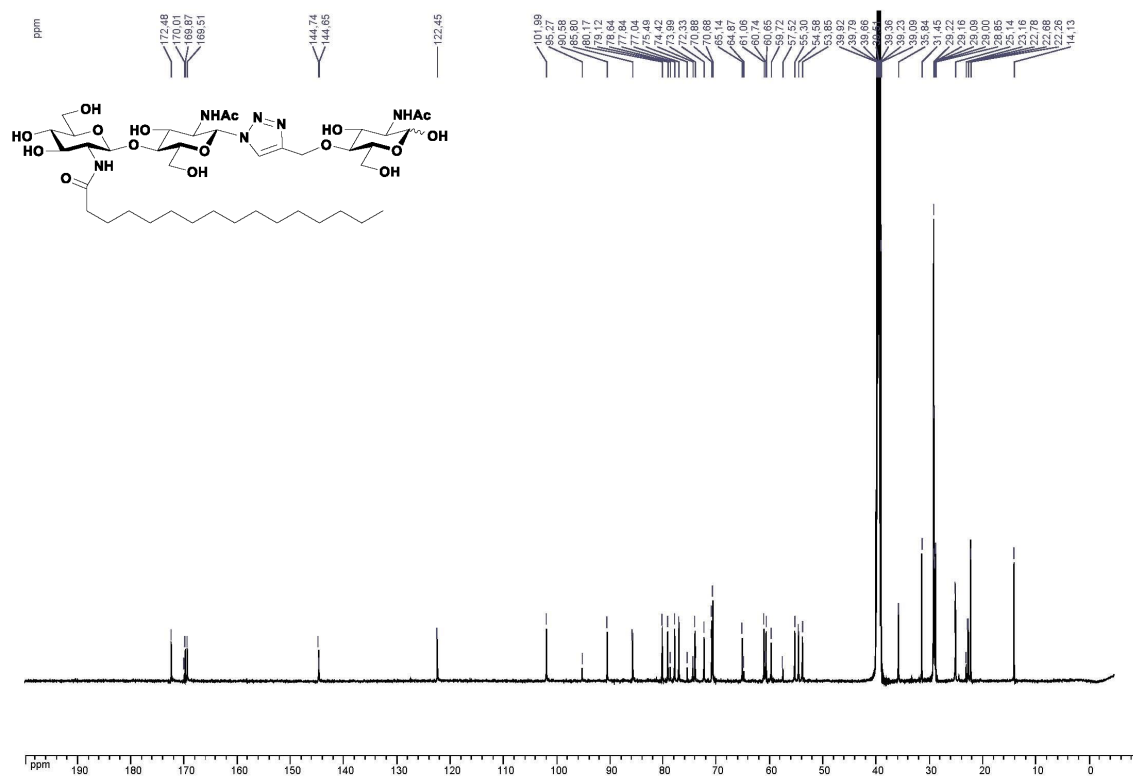

## Compound (3) HSQC NMR

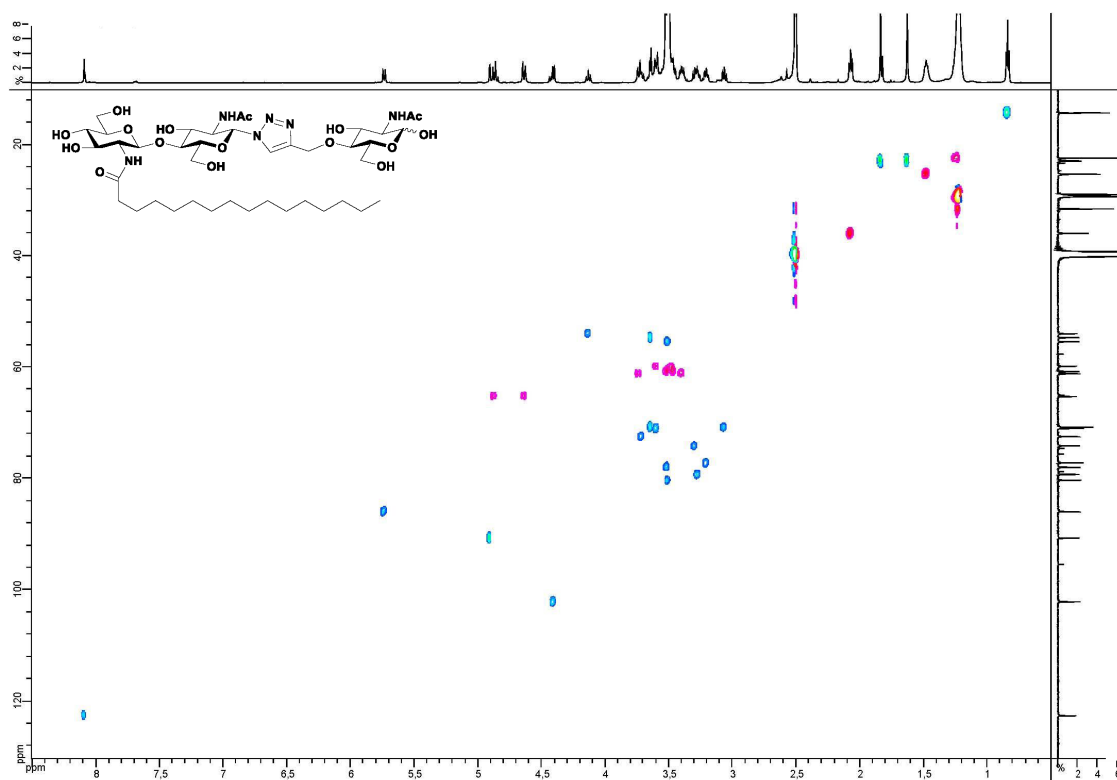

## Compound (3) HMBC NMR

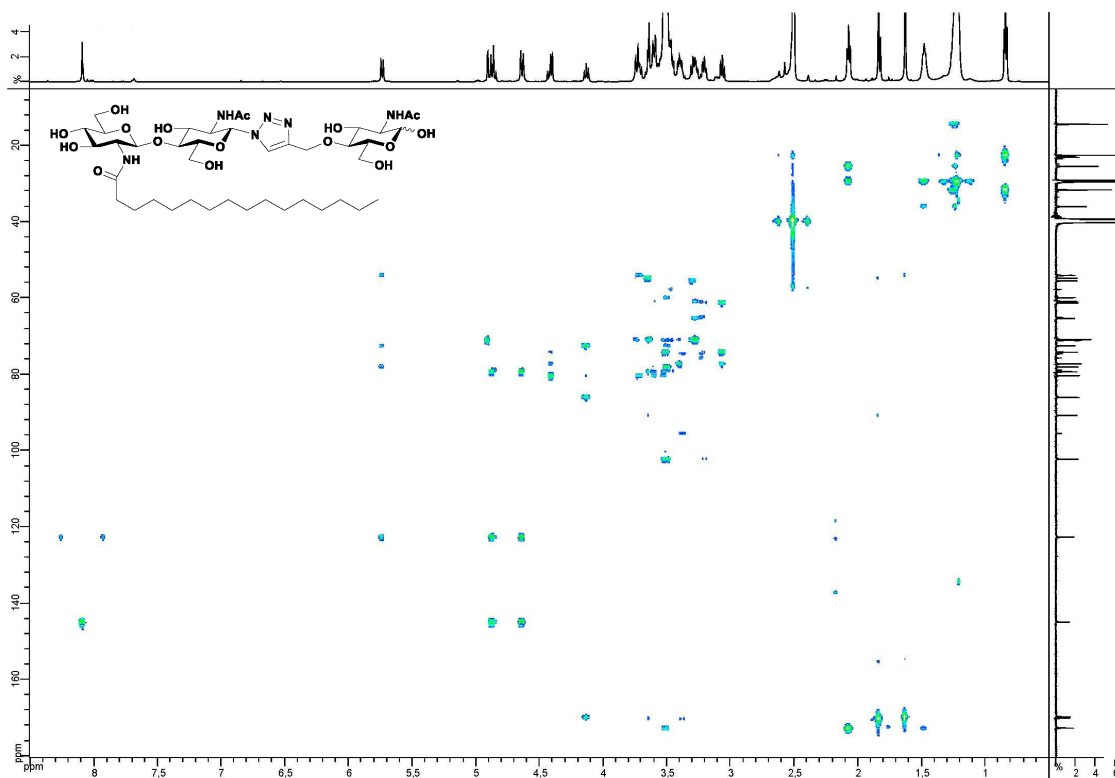





## Compound (4) COSY NMR

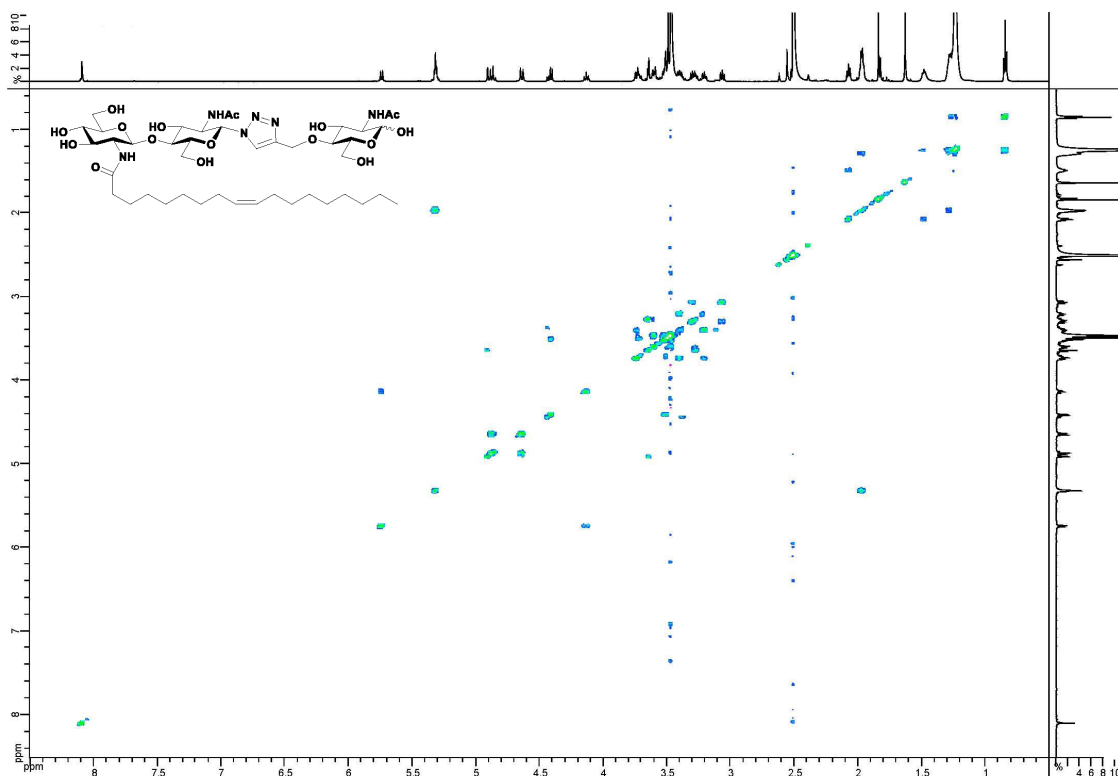

## Compound (4) COSY NMR

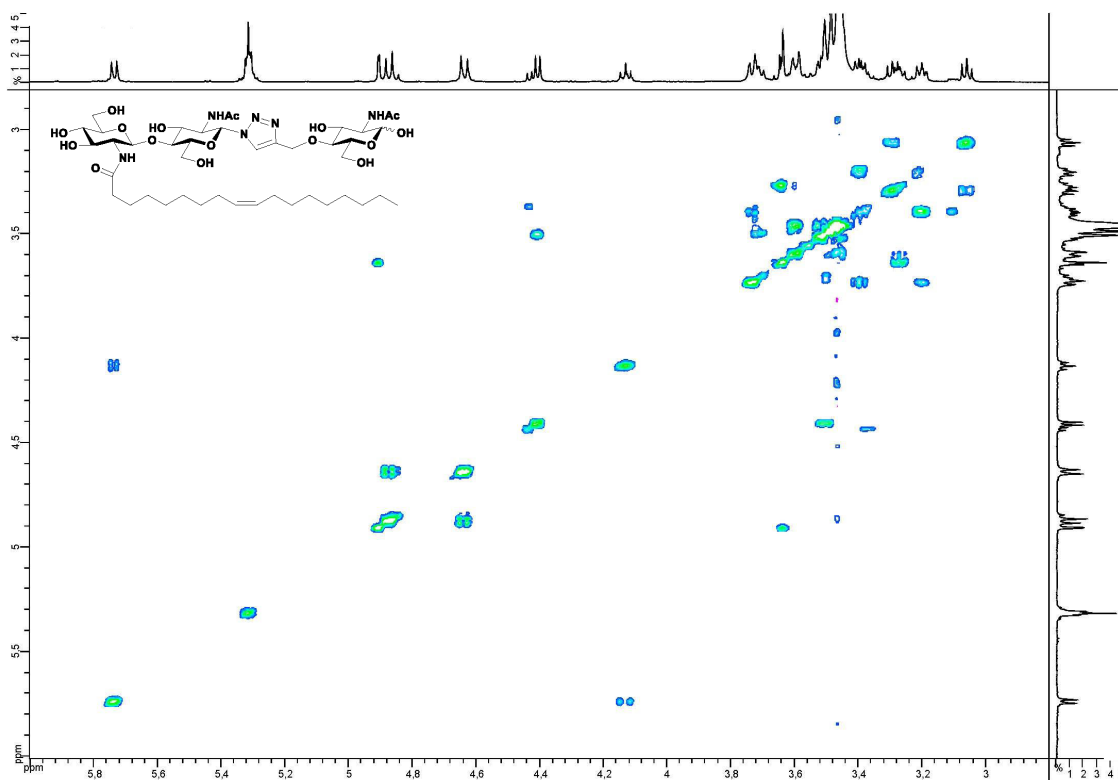

Compound (4)  $^{13}\text{C}$  NMR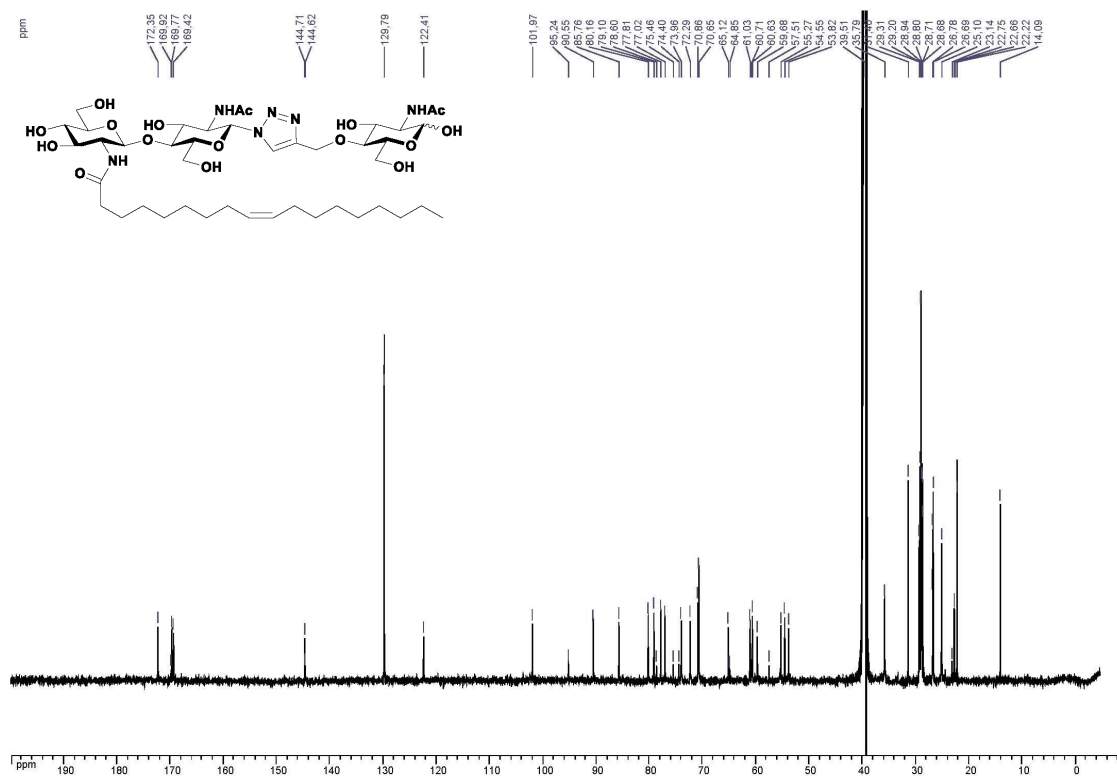

## Compound (4) HSQC NMR

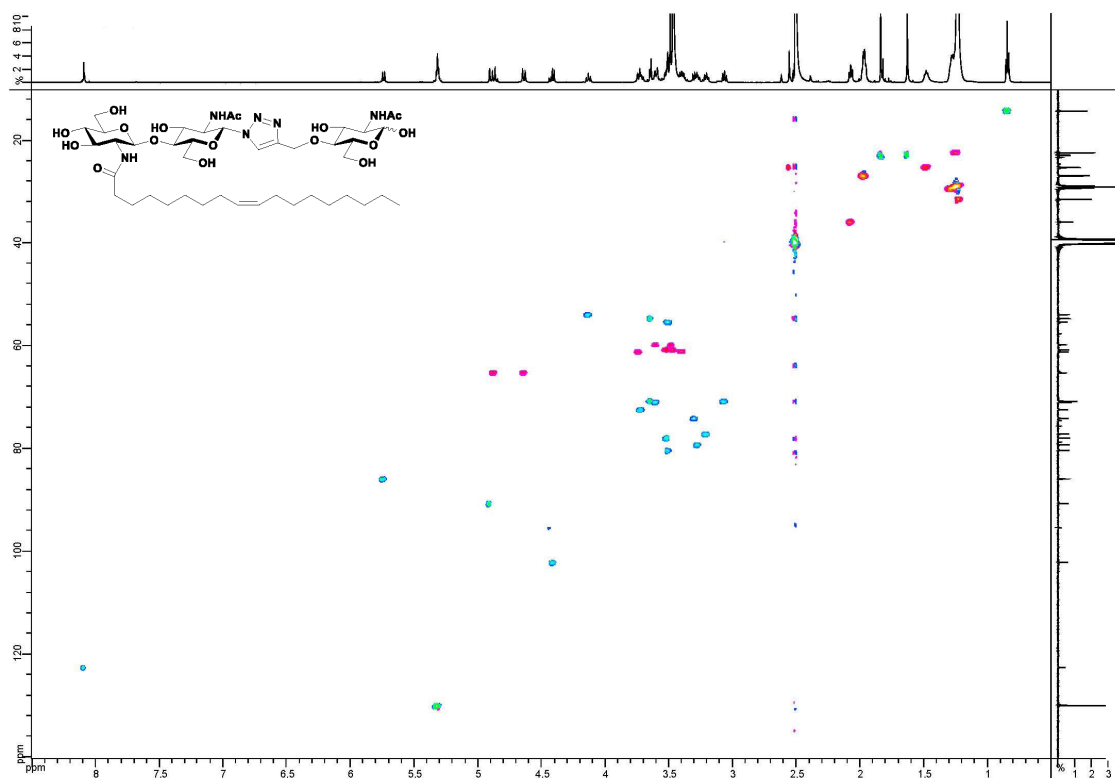

## Compound (4) HMBC NMR

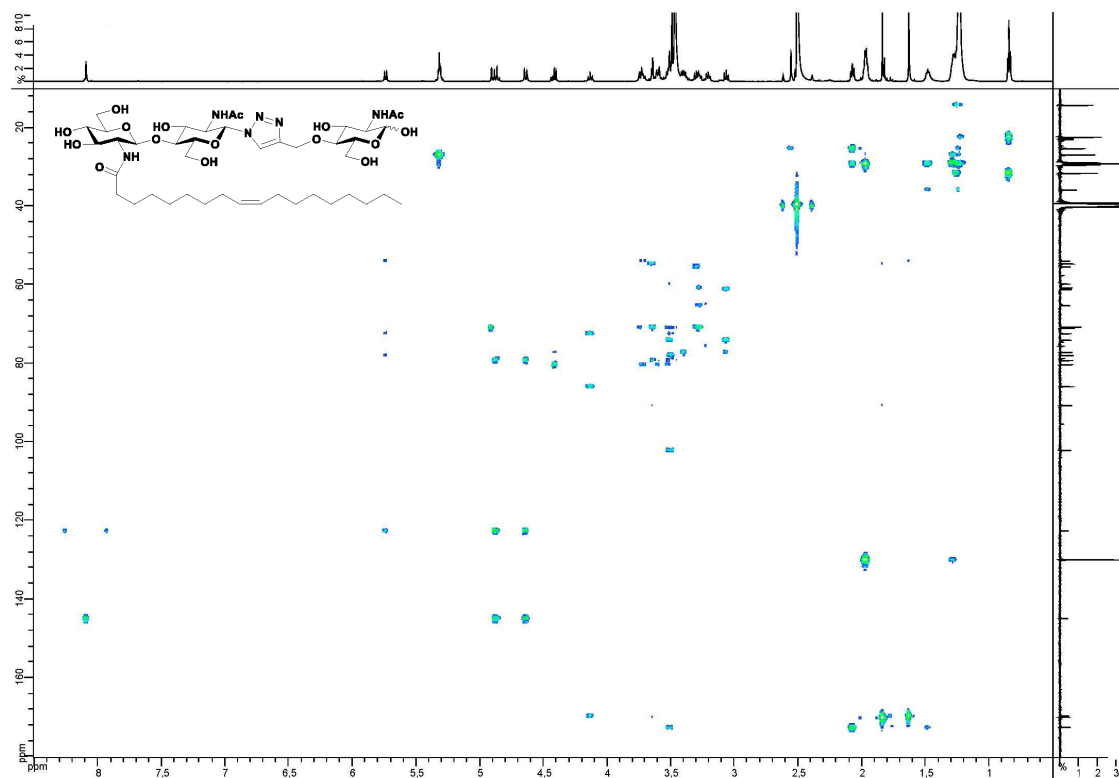

Compound (3S) <sup>1</sup>H NMR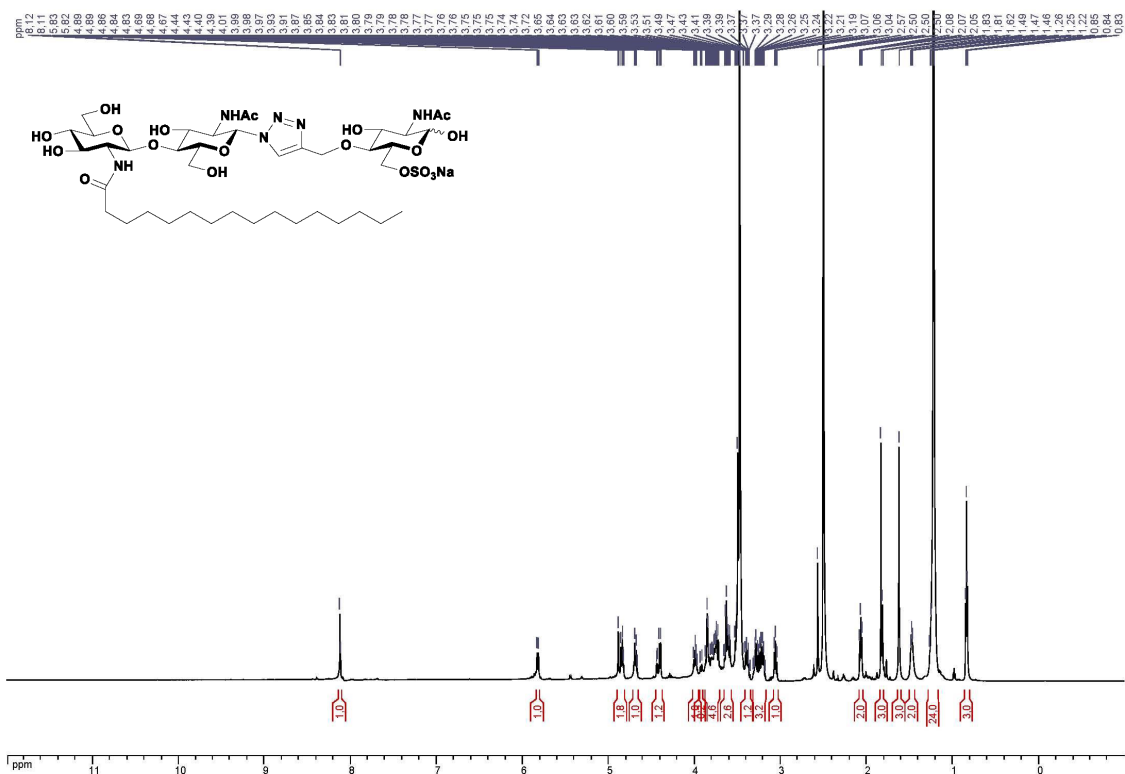Compound (3S) <sup>1</sup>H NMR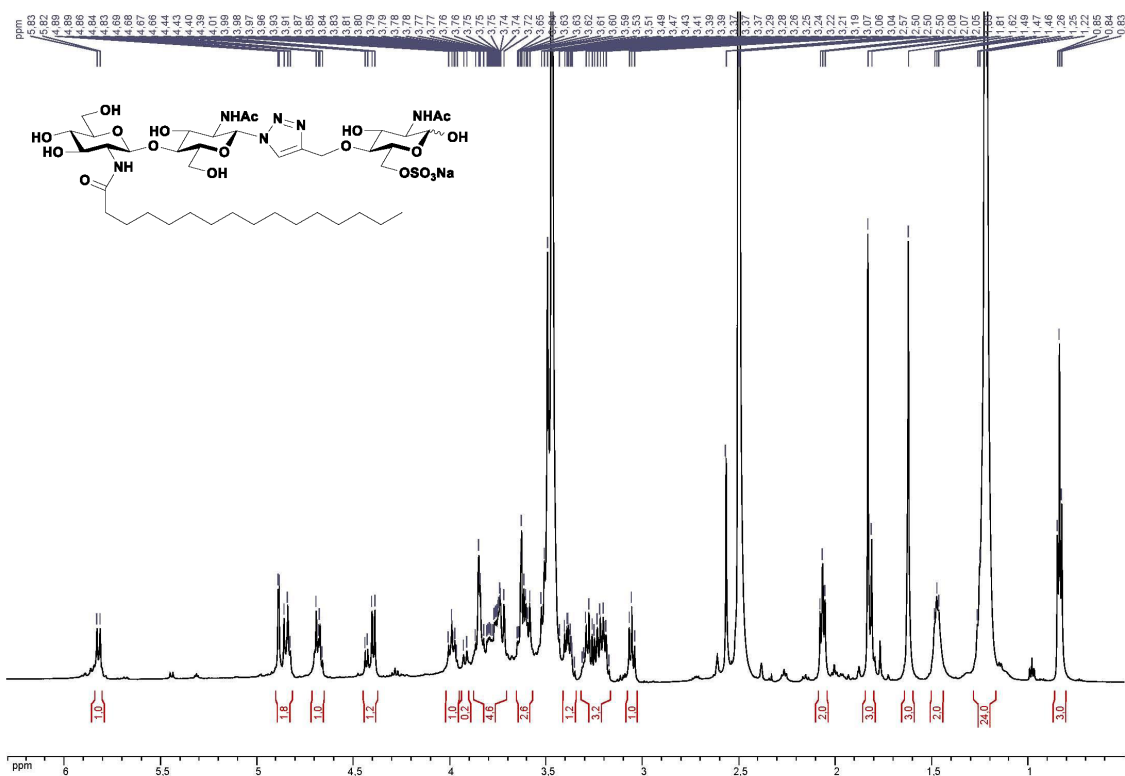

## Compound (3S) COSY NMR

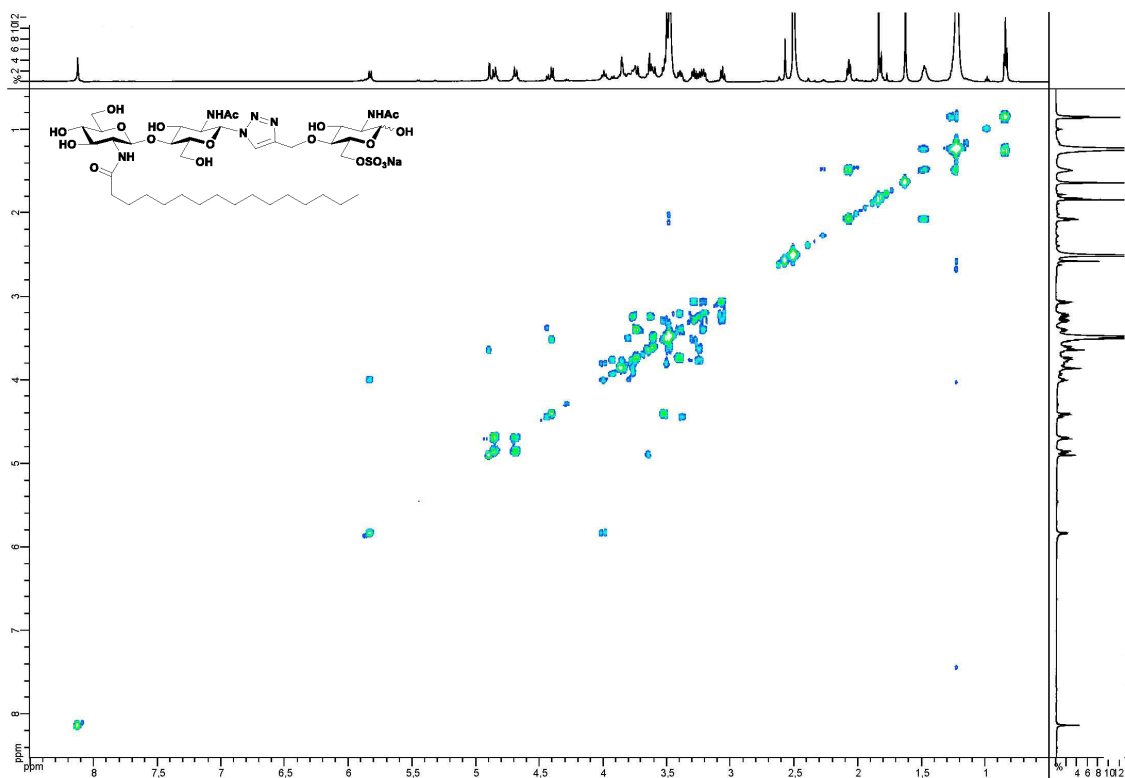

## Compound (3S) COSY NMR

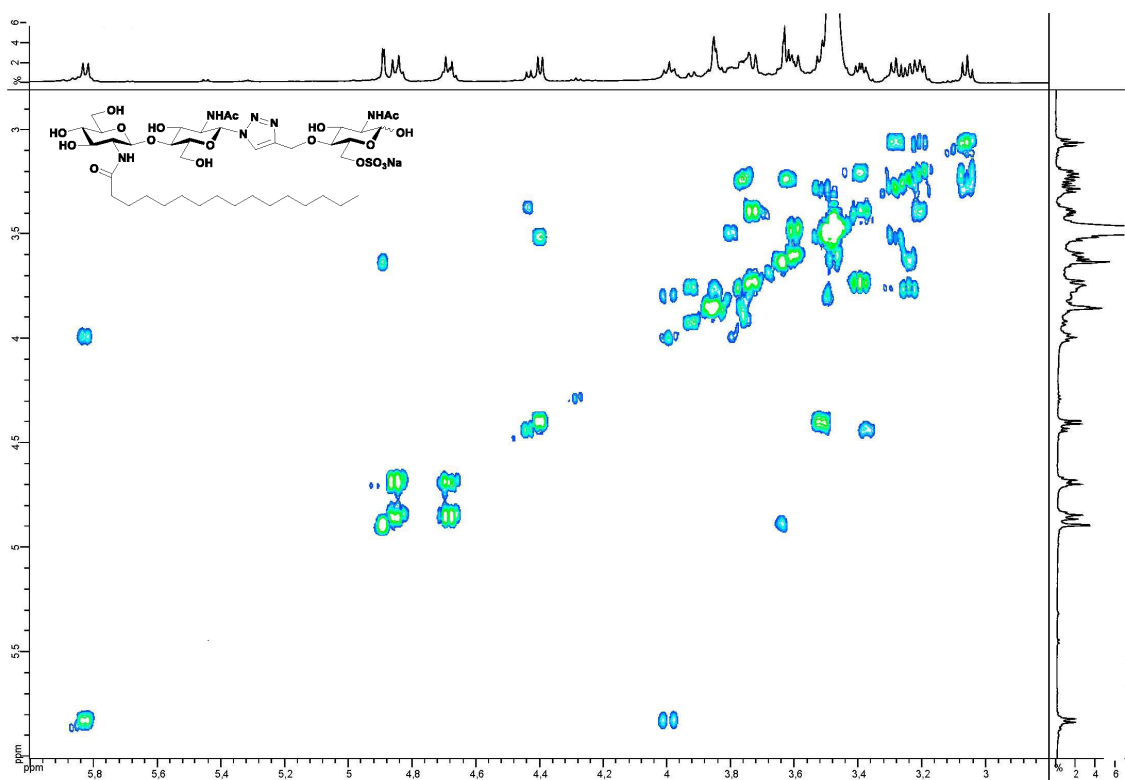

Compound (3S)  $^{13}\text{C}$  NMR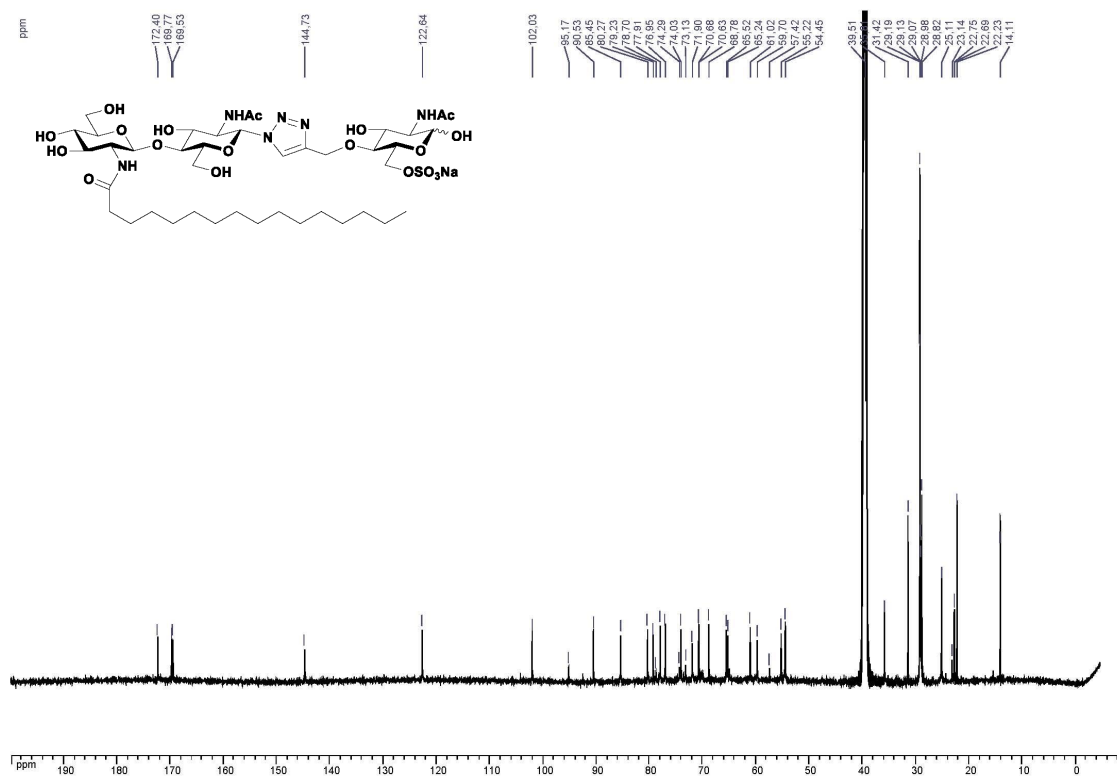

## Compound (3S) HSQC NMR

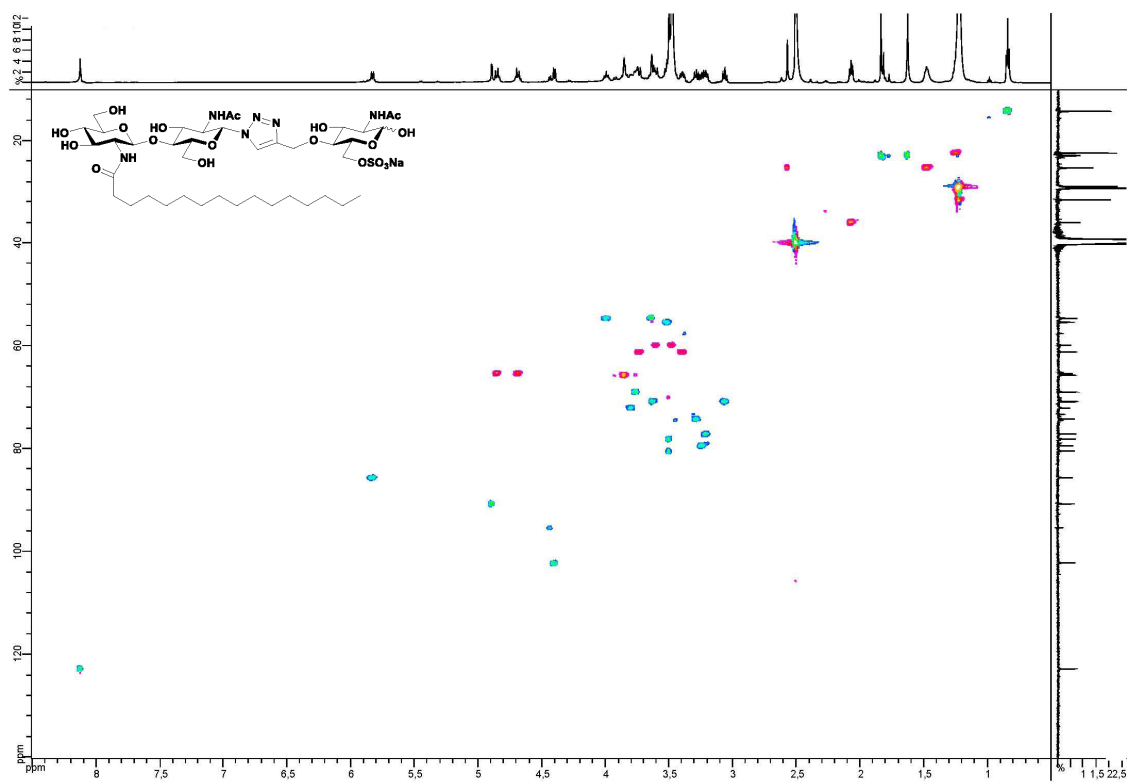

## Compound (3S) HMBC NMR

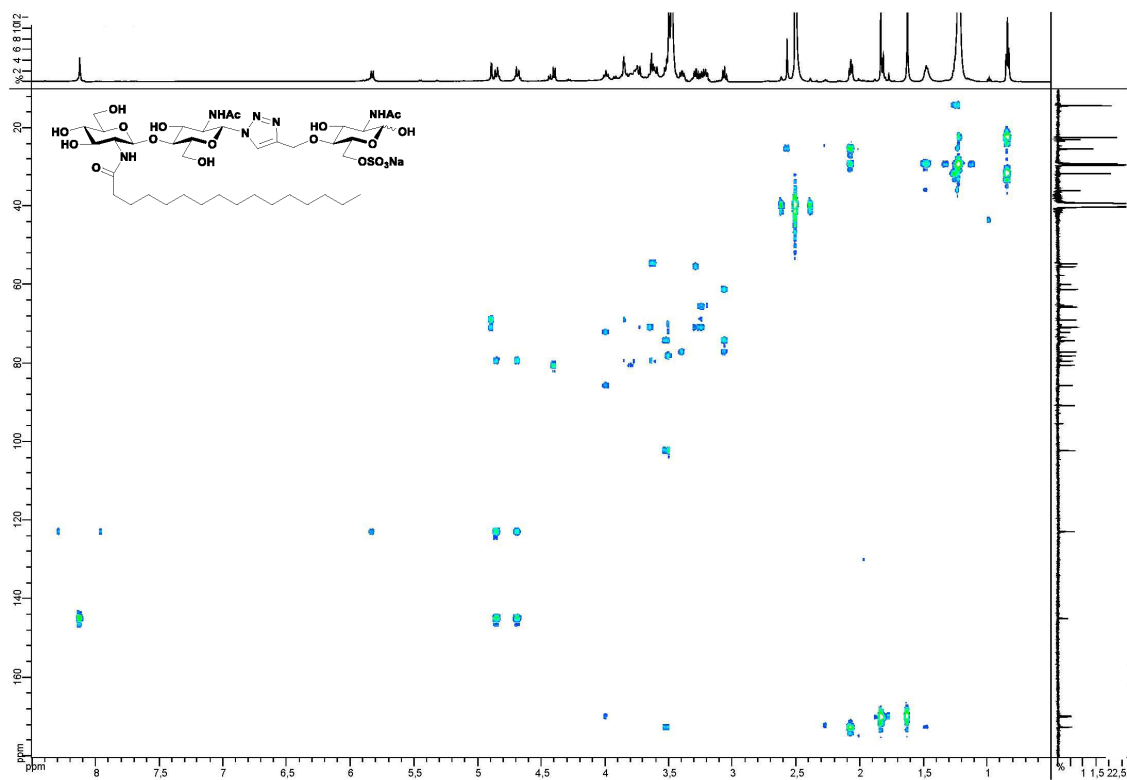

Compound (4S) <sup>1</sup>H NMR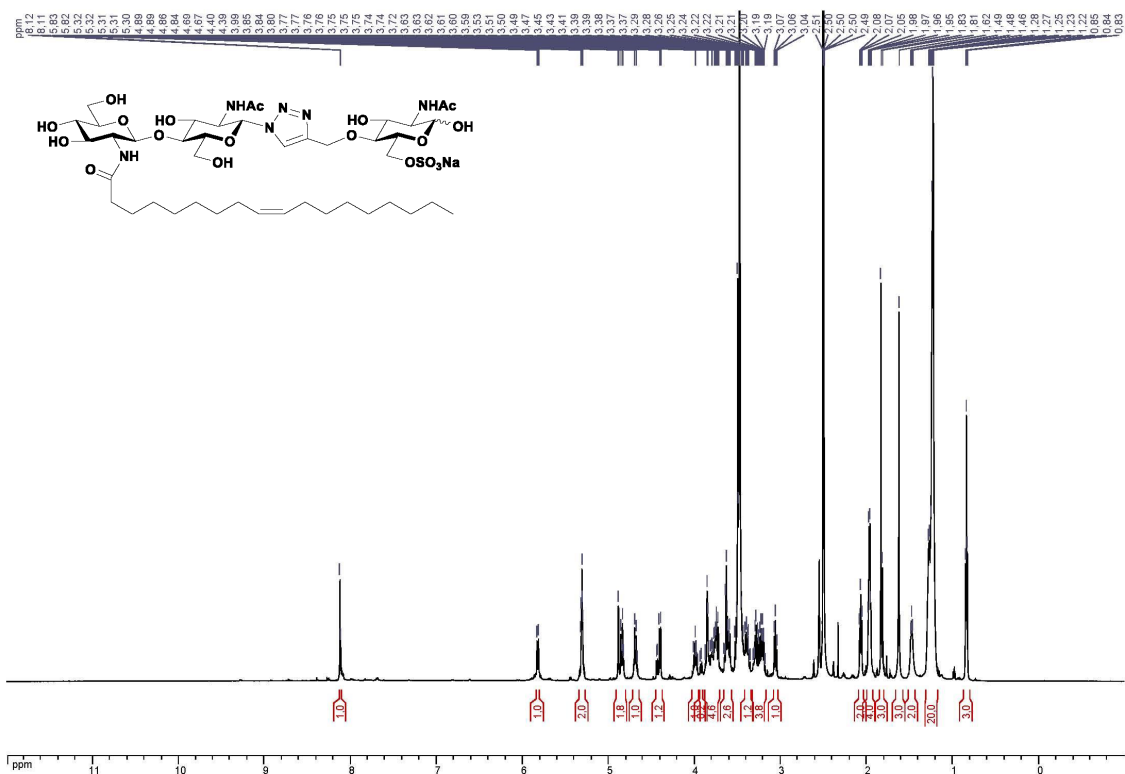Compound (4S) <sup>1</sup>H NMR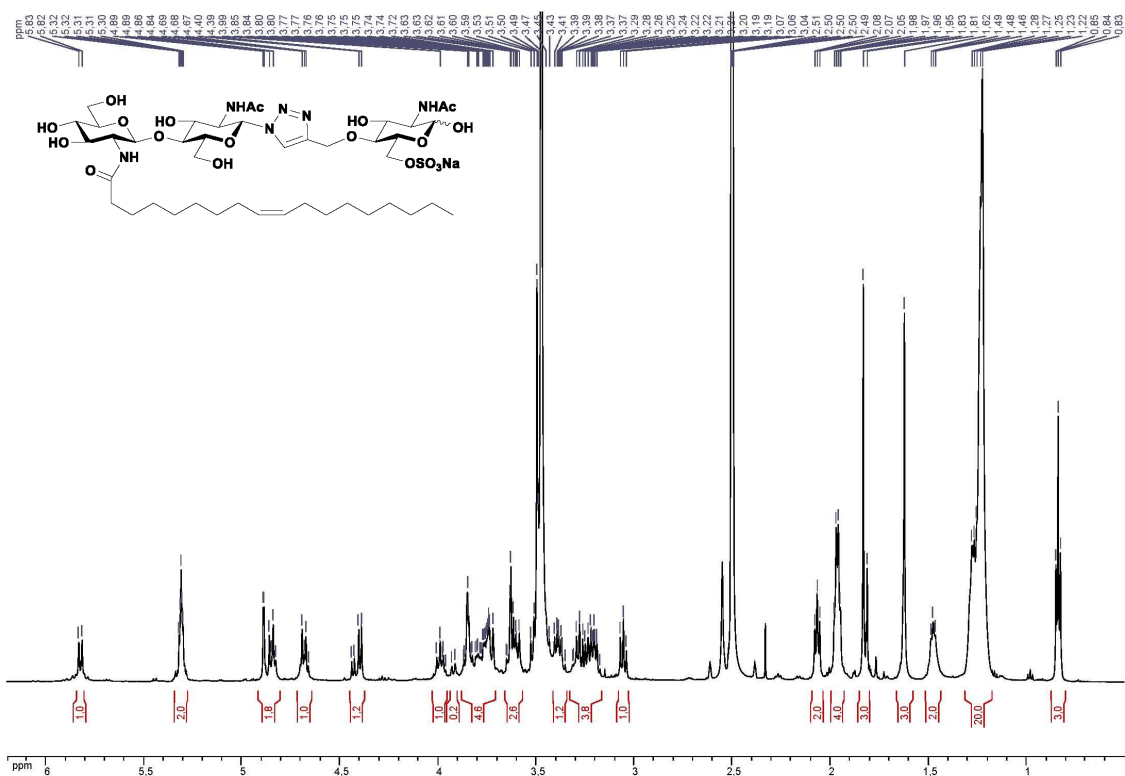



## Compound (4S) COSY NMR

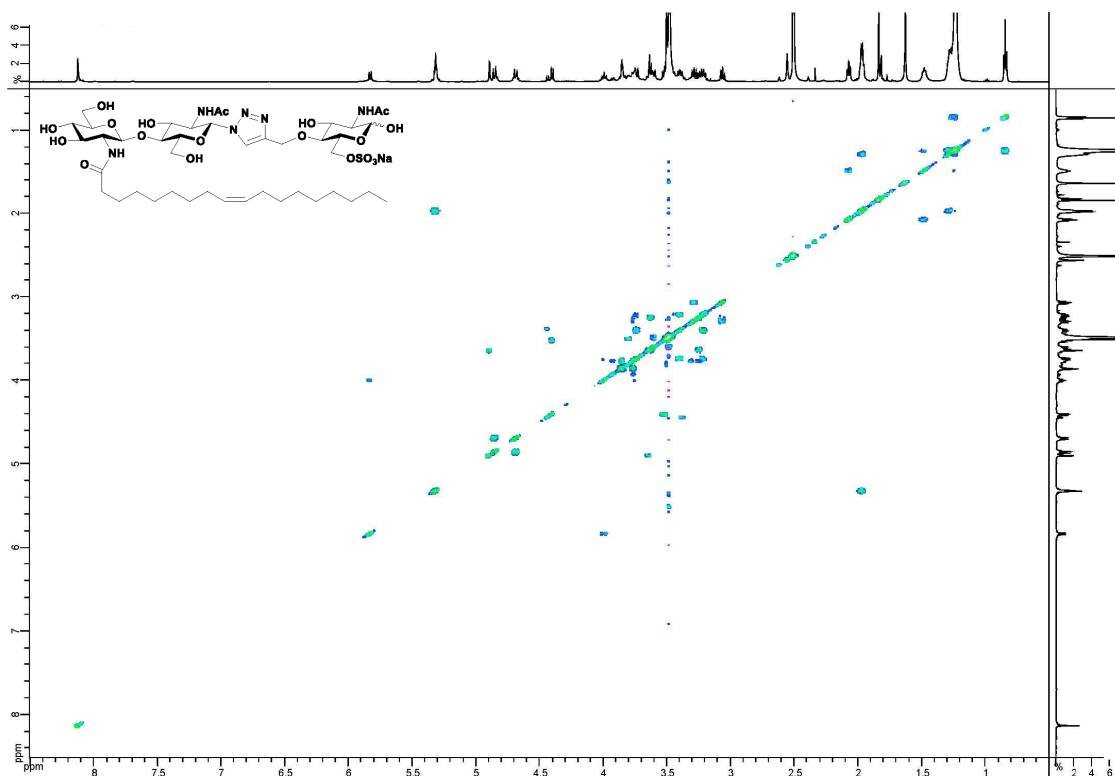

## Compound (4S) COSY NMR

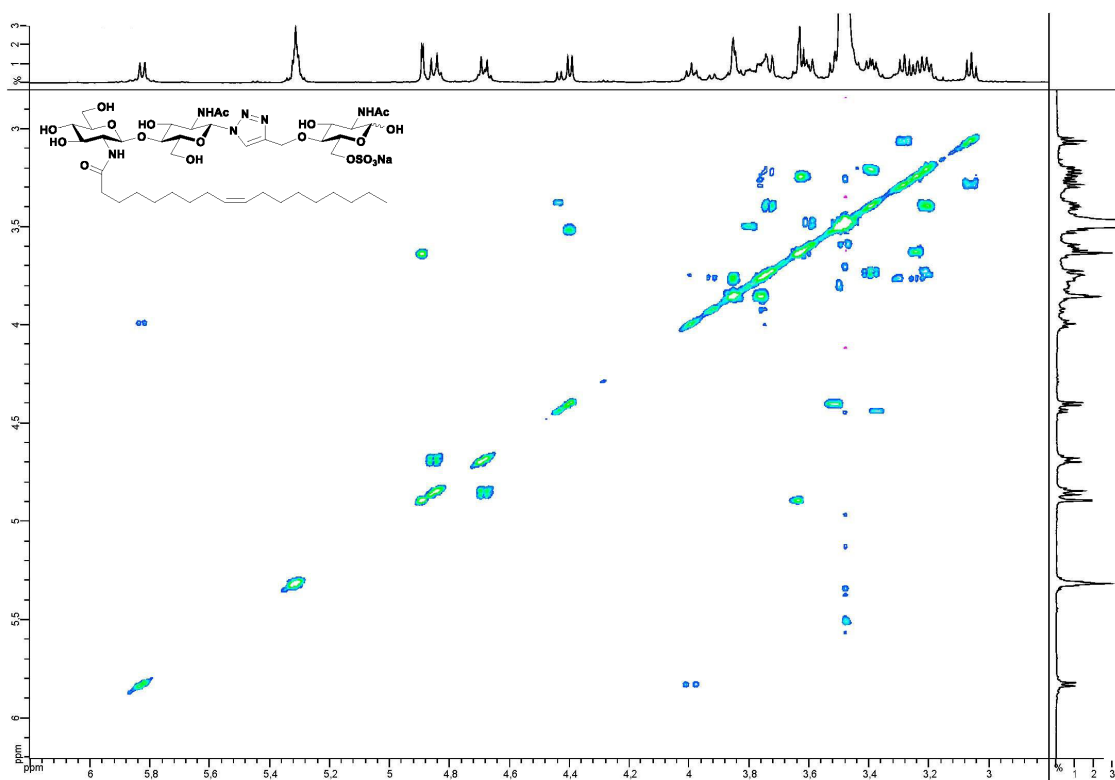

Compound (4S)  $^{13}\text{C}$  NMR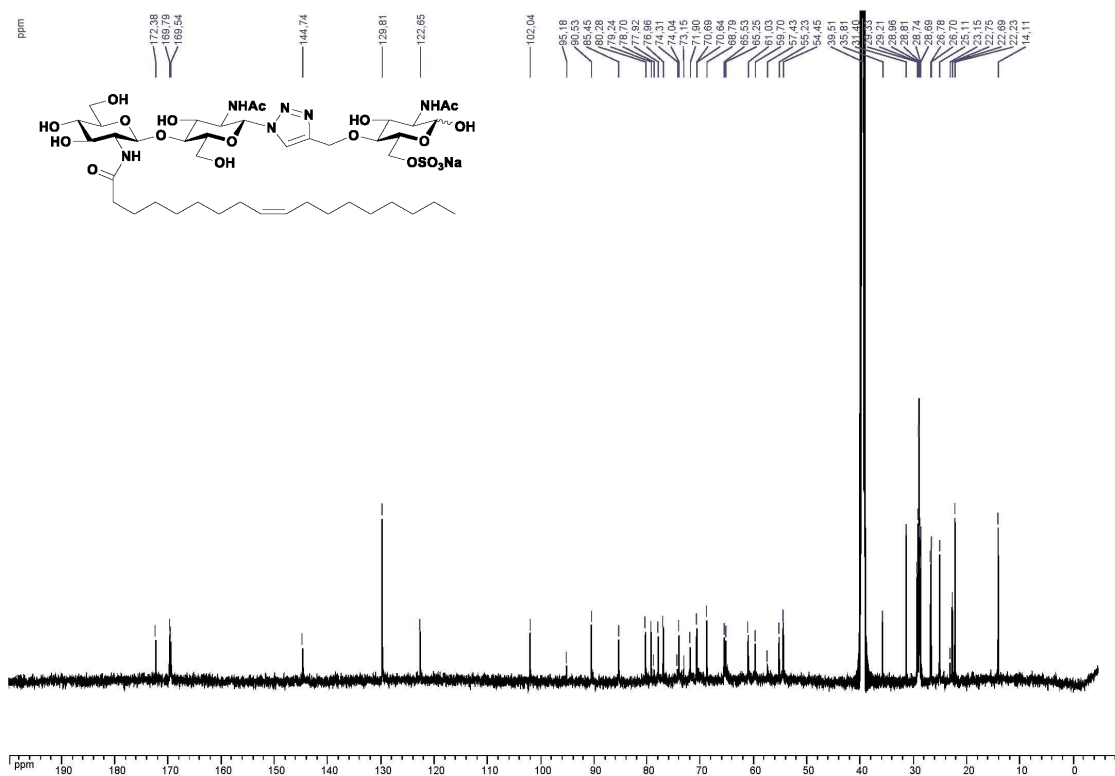

## Compound (4S) HSQC NMR

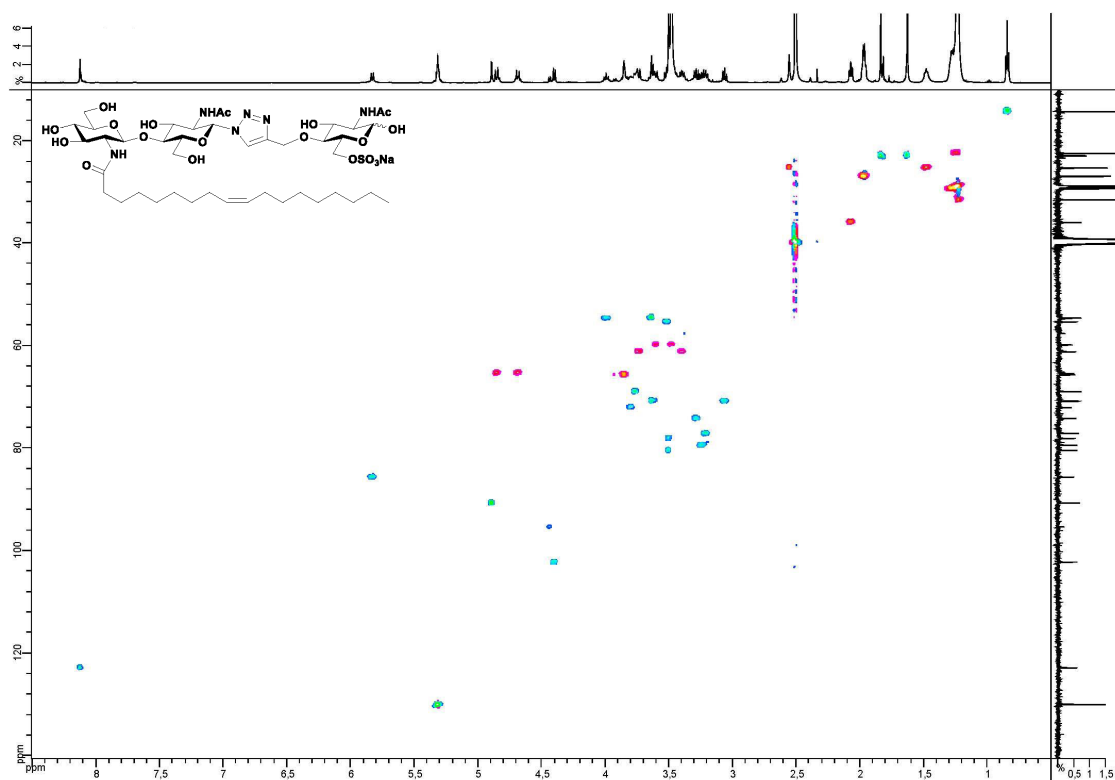

## Compound (4S) HMBC NMR

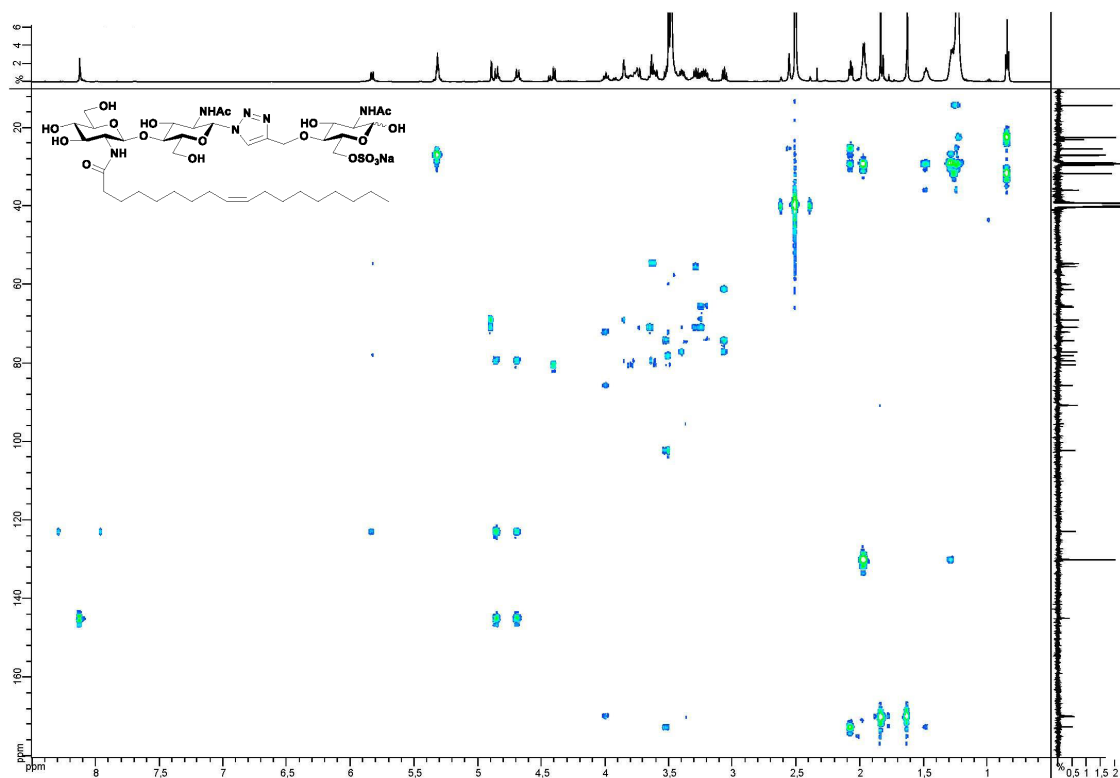

Supplement: c7ob01201b1.pdf [file c7ob01201b1.pdf]
